1 **Ambulacrarian insulin-related peptides and their putative**  
2 **receptors suggest how insulin and similar peptides may**  
3 **have evolved from Insulin-like Growth Factor**

4  
5 Jan A. Veenstra<sup>1</sup>,

6

7 <sup>1</sup> INCIA UMR 5287 CNRS, Université de Bordeaux, Pessac, France.

8

9 Corresponding Author:

10 Jan A. Veenstra<sup>1</sup>

11 INCIA UMR 5287 CNRS, Université de Bordeaux, allée Geoffroy St Hillaire, CS 50023, 33 615

12 Pessac Cedex, France

13 Email address: [jan-adrianus.veenstra@u-bordeaux.fr](mailto:jan-adrianus.veenstra@u-bordeaux.fr)

14

15

16

17

18

19

20 **Abstract**

21 **Background**

22 Some Insulin/IGF-related peptides (irps) stimulate a receptor tyrosine kinase (RTK) that transfers the  
23 extracellular hormonal signal into an intracellular response. Other irps, such as relaxin, do not use an

24 RTK, but a G-protein coupled receptor (GPCR). This is unusual since evolutionarily related hormones  
25 typically either use the same or paralogous receptors. In arthropods three different irps, *i.e.* arthropod  
26 IGF, gonadulin and *Drosophila* insulin-like peptide 7 (dilp7), likely evolved from a gene triplication, as  
27 in several species genes encoding these three peptides are located next to one another on the same  
28 chromosomal fragment. These arthropod irps have homologs in vertebrates, which suggests that the  
29 initial gene triplication was perhaps already present in the last common ancestor of deuterostomes and  
30 protostomes. It would be interesting to know whether this is indeed so and how insulin might be related  
31 to this trio of irps.

## 32 **Methodology**

33 Genes encoding irps as well as their putative receptors were identified in genomes and transcriptomes  
34 from echinoderms and hemichordates.

## 35 **Results**

36 A similar triplet of genes coding for irps is also found in some ambulacrarians. Two of these are  
37 orthologs of arthropod IGF and dilp7 and the third is likely a gonadulin ortholog. In echinoderms two  
38 novel irps emerged, gonad stimulating substance (GSS) and multinsulin, likely from gene duplications  
39 of the IGF and dilp7-like genes respectively. The structures of GSS diverged considerably from IGF,  
40 which would suggest they use different receptors than IGF, but no novel irp receptors evolved. If IGF  
41 and GSS use different receptors and the evolution of GSS from a gene duplication of IGF is not  
42 associated with the appearance of a novel receptor while irps are known to use two different types of  
43 receptors, it seems to suggest that the ancestor of GSS and IGF might have acted on both types of  
44 receptors while one or both of its descendants act on only one. There are three ambulacrarian GPCRs  
45 that have amino acid sequences suggestive of being irp GPCRs, two of these are orthologs of the  
46 gonadulin and dilp7 receptors. This suggests that the third might be an IGF receptor, and that by  
47 deduction GSS only acts on the RTK. The evolution of GSS from IGF may represent a pattern, where  
48 IGF gene duplications lead to novel genes coding for shorter peptides that activate an RTK. It is likely  
49 this is how insulin and the insect neuroendocrine irps evolved independently from IGF.

## 50 **Conclusion**

51 The local gene triplication described from arthropods that yielded three genes encoding irps was  
52 already present in the last common ancestor of protostomes and deuterostomes. It seems plausible that

53 irps, such as those produced by neuroendocrine cells in the brain of insects and echinoderm GSS  
54 evolved independently from IGF and thus are not true orthologs, but the result of convergent evolution.

55

56

57 Key words: insulin; relaxin; receptor tyrosine kinase; G-protein coupled receptor; evolution; gonadulin;

58 octinsulin; multinsulin; dilp7

## 59 Introduction

60 Many protein hormone and neuropeptide signaling pathways have orthologs in both protostomes  
61 and deuterostomes showing that these pathways were already present in their last common bilaterian  
62 ancestor. In some cases the orthologs of the peptide ligands show only limited sequence similarity, but  
63 their receptors contain protein domains that are sufficiently conserved to establish homology. Virtually  
64 all ligands employ either a single receptor or a number of related receptors that evolved by gene  
65 duplication. Co-evolution of peptide ligands and receptors insures that related protein hormones or  
66 neuropeptides use receptors akin to those of their orthologs (Mirabeau & Joly, 2013; Hsueh & Feng,  
67 2020).

68 Insulin/IGF-related peptides (irps) are an exception to this rule. Whereas insulin and IGF act  
69 through a receptor tyrosine kinase (RTK), relaxin uses a leucine-rich repeat G-protein coupled receptor  
70 (LGR). This raises the interesting question as how this apparent jump from one type of receptor to  
71 another may have come about. In cockroaches, termites and stick insects three different irp genes,  
72 gonadulin, arthropod insulin-like growth factor (aIGF) and arthropod relaxin, are located next to one  
73 another in the genome and thus likely originated from a local gene triplication (Veenstra, 2020b). To  
74 avoid confusion with the vertebrate relaxins and related peptides, the arthropod relaxins will be referred  
75 to as *Drosophila* ilp7 (dilp7) in this manuscript. One of their irps, aIGF, is known to use an insulin RTK,  
76 while gonadulin acts through insect LGR3 (Vallejo et al., 2015; Garelli et al., 2015; Colombani et al.,  
77 2015). Bioinformatic evidence suggested that dilp7 must be the ligand for insect LGR4 and this has  
78 now been confirmed experimentally in *Drosophila* (Veenstra, Rombauts & Grbić, 2012; Imambocus et  
79 al., 2020), but dilp7 may also activate an RTK (Linneweber et al., 2014). This suggests that the  
80 archtype arthropod IGF-related peptide acted through both an RTK and an LGR and that after a likely  
81 gene triplication, some of the ligands may have lost one of the two original receptors. Although it is  
82 possible that the gene triplication of the ancestral insulin gene occurred in an early arthropod or  
83 protostomian, it may well have occurred in a bilaterian ancestor, as homologs of both aIGF and dilp7  
84 are also present in deuterostomes.

85 Brain neuroendocrine insect irps are more closely related to IGF than either dilp7 or gonadulin and  
86 a gene duplication that gave rise to separate genes encoding these peptides is therefore likely to have  
87 occurred after the triplication that gave rise to the ancestor genes of gonadulin and dilp7. Yet in insect  
88 genomes irp genes are not located near the IGF gene. Thus the particular organization of these genes  
89 suggests that whereas the gonadulin and dilp7 genes likely originated by two successive local gene

90 duplications, the IGF gene duplication that gave rise to an initial arthropod neuroendocrine brain irp  
91 must have materialized in a different fashion. If the earlier mentioned gene triplication was already  
92 present in the last common ancestor of the deuterostomes then a similar argument can also be made for  
93 the evolution of insulin. Given the importance of insulin as a human hormone and the inherent interest  
94 of its evolutionary origin, I explored the evolution of bilaterian insulin-related peptides in more detail  
95 and here report on the genes coding for such peptides and their receptors in the Ambulacraria that  
96 suggest how insulin may have evolved from IGF.

97

## 98 **Materials and Methods**

### 99 *Nomenclature*

100 Hormones have often been discovered independently by different groups using different bioassays.  
101 The vertebrate insulin-like growth factors are a good example of that. Predicted protostomian peptides  
102 and their receptors have sometimes been given names that refer to similar deuterostomian proteins. In  
103 some cases this is very confusing, *e.g.* vertebrate LGR-3, -4 and -5 are not the orthologs of arthropod  
104 receptors that have been given the same names. A similar problem occurs with arthropod relaxin that is  
105 not an ortholog of vertebrate relaxin. This peptide will therefore be called dilp7 (*Drosophila* insulin-  
106 like peptide 7). I will refer to arthropod LGR3 as the gonadulin receptor, arthropod LGR4 as the dilp7  
107 receptor and arthropod LGR5 as GRL101, a GPCR initially identified from the pond snail *Lymnaea*  
108 *stagnalis* (Tensen et al., 1994) that is an ortholog of arthropod LGR5 (Veenstra, 2020b).

109 Another nomenclature problem concerns the terms, insulin-like and insulin-related that are not well  
110 defined. Insulin and IGF are related and must share a common evolutionary origin with other peptide  
111 ligands like vertebrate relaxin, INSL3, arthropod dilp7 and gonadulin and a large number of other  
112 bilaterian peptides. All these peptides are often collectively called insulin-like or insulin-related without  
113 any specification as to in which aspects these hormones are similar to insulin. The typical core  
114 sequence of six cysteine residues and its use of an RTK are two characters that are shared by vertebrate  
115 IGF and insulin. However, several related peptides have eight cysteine residues and others like  
116 vertebrate relaxin use an LGR and not an RTK. Insulin and IGF are also different in that IGF is a single  
117 chain molecules, while the insulin precursor is processed into a two chain molecule. The term insulin-  
118 like seems more appropriate for a subset of the insulin/IGF-related peptides that look similar to insulin  
119 and act through an RTK, yet are different from IGF. Calling IGF-related peptides like vertebrate  
120 relaxin, INSL3 or arthropod gonadulin for which there is no evidence that they act through an RTK,

121 insulin-like is confusing. Unfortunately for many bilaterian peptides we can only speculate as to which  
122 type of receptor they use. The difference between one or two chain ligands, *i.e.* IGF versus insulin, is  
123 also useless as there is good evidence that some insect IGF-related peptides are processed into two-  
124 chain molecules when expressed in neuroendocrine cells and produced as single chain ligands when  
125 produced by the fat body, yet in both cases stimulate an RTK. It is for these reasons that all these  
126 peptides will be referred to as insulin/IGF-related peptides, abbreviated irps.

127

## 128 *Sequence analysis*

129 Sequences for insulin related peptides and their likely receptors were identified from a number of  
130 Ambulacraria species. This was done using using the Artemis program (Rutherford et al., 2000) and the  
131 BLAST+ program (<ftp://ftp.ncbi.nlm.nih.gov/blast/executables/blast/>) on publicly available genome  
132 sequences from the feather star *Anneissia japonica*, the sea urchins *Lytechinus variegatus* (Davidson et  
133 al., 2000) and *Strongylocentrus purpuratus* (Sea Urchin Genome Sequencing Consortium, 2006), the  
134 sea cucumbers *Apostichopus japonicus* (Jo et al., 2017; Zhang et al., 2017) and *Holothuria glaberrima*,  
135 the sea stars *Acanthaster planci* (Hall et al., 2017), *Pisaster ochraceus* (Ruiz-Ramos et al., 2020) and  
136 *Patiria miniata*, the brittle star *Ophiothrix spiculata* and the hemichordates *Saccoglossus kowalevskii*  
137 and *Ptychodera flava* (Simakov et al., 2015). The genomes were downloaded from  
138 <https://www.ncbi.nlm.nih.gov/genome>. For many of these species there are also significant amounts of  
139 RNAseq data and these were analyzed using the sratoolkit  
140 (<https://trace.ncbi.nlm.nih.gov/Traces/sra/sra.cgi?view=software>) in combination with Trinity  
141 (Grabherr et al., 2011) using methods described in detail elsewhere (Veenstra, 2020b). Some protein  
142 sequences were found in the NCBI database, but several of them contain errors or are incomplete.  
143 Where possible these were corrected and/or completed using the methods described above. As there is  
144 only a single crinoid genome assembly available, transcriptome data from the three crinoid species  
145 *Antedon mediterranea*, *Florometra serratissima* and *Oligometra serripinna* were also included. For the  
146 same reason transcriptome data from the brittle star *Amphiura filliformis*, *Ophioderma brevispina* and  
147 the hemichordate *Schizocardium californicum* were likewise analyzed. Obviously, transcriptome data  
148 can only demonstrate the presence of gene but not its absence and their usefulness depends largely on  
149 the variety of tissues sampled and the expression levels of the genes of interest. Nevertheless, such data  
150 often provide additional sequences that even if they are incomplete increase the robustness of sequence  
151 comparisons. Genomic and transcriptomic RNAseq short read archives (SRAs) were downloaded from

152 NCBI (<https://www.ncbi.nlm.nih.gov/sra/>); a list of the SRAs analyzed is provided in the  
153 supplementary data.

154 As queries for the insulin-like peptides a number of such peptides from a variety of species was  
155 used. Insulin RTKs are easily identified in genome and transcriptome assemblies, as their kinase  
156 domains are very well conserved. The LGRs that could function as insulin receptors are more variable.  
157 Vertebrate RXFP1 and RXFP2 are LGRs are known receptors for relaxin and Ins3 and *Drosophila*  
158 LGR3 and LGR4 for gonadulin, and dilp7 respectively. Other LGRs function as receptors for the  
159 various glycoprotein hormones, GPA2/GPB5, bursicon, TSH, FSH and LH. These GPCRs cluster on  
160 phylogenetic trees with another protostomian LGR, GRL101. This GPCR was initially identified from  
161 the pond snail *Lymnaea stagnalis* and was the first GPCR discovered to have in addition to six leucine-  
162 rich repeats also twelve repeats of a sequence that was known to exist in the low density lipoprotein  
163 receptor and are now called LDLa repeats (Tensen et al., 1994). I have suggested previously (Veenstra,  
164 2020b) that this receptor might be an IGF receptor.

165 Both the RTK and LGR receptors have large ectodomains. Those of the insulin RTKs are very  
166 similar from one receptor to another, while those of the LGRs differ between different types. The latter  
167 all contain numerous Leucine-rich repeats (LRRs) and some also have LDL-receptor class A (LDLa)  
168 repeats. Both LRRs and LDLa's are present in many other proteins. Initial searches for orthologous  
169 receptors were therefore done using the transmembrane regions of various insect and vertebrate LGRs  
170 and the protein kinase domain of RTK. Once partial sequences of putative receptors were identified, the  
171 coding sequences of these domains were then used to complete the cDNA sequences as best as  
172 possible, using either Trinity on RNAseq SRAs or Artemis on genome sequences.

173

#### 174 *Sequence similarity and phylogenetic trees*

175 Both phylogenetic and sequence similarity trees use Clustal omega (Sievers et al., 2011) to produce  
176 alignments. Fasttree (Price, Dehal & Arkin, 2010), using the `./FastTreeDbl` command with the `-spr 4, -`  
177 `mlacc 2` and `-slownni` options, was used to construct trees and estimate probabilities.

178 In order to identify putative receptors for the various irps, LGRs that show homology to various  
179 arthropod and vertebrate LGRs were identified and a phylogenetic tree based exclusively on the  
180 transmembrane regions of these receptors was constructed.

181

#### 182 *Precursor processing*

183 Precursors of insulin-like peptides contain signal peptides that are removed on entry into  
184 endoplasmatic reticulum. Signal P 5.0 (Almagro Armenteros et al., 2019) was used online  
185 (<http://www.cbs.dtu.dk/services/SignalP/>) to predict where this cleavage would most likely occur.  
186 Some, but not all precursors are further processed by convertases. Of these furin is ubiquitously present  
187 in all cell types and can thus potentially cleave any secreted protein with appropriate cleavage site. Its  
188 consensus cleavage site is K/R-X-K/R-R, the two human IGF precursors are processed at KSAR and  
189 KSER respectively (Humbel, 1990). Precursors that are produced in cells with a regulated pathway,  
190 such as neuroendocrine and enteroendocrine cells, are also exposed to other convertases like PC1/3 and  
191 PC2. Their consensus cleavages site is KR. However, effective proteolytic processing by convertases is  
192 strongly influenced by amino acid residues surrounding these consensus cleavage sites. For example  
193 bulky residues immediately following the arginine residue, a proline residue before the consensus site  
194 or disulfide bridges nearby can cause sufficient steric hindrance to inhibit cleavage. Using rules  
195 proposed to predict cleavage by PC1/3 and PC2 in both vertebrates and insects (Devi, 1991; Rholam et  
196 al., 1995; Veenstra, 2000) I have tried to indicate in Figs. 3-6 where the various precursors might be  
197 cleaved. It must be noted though that there is no certainty that these site will be cleaved nor can it be  
198 excluded that proteolytic processing occurs at sites that have not been indicated as such.

199

## 200 *Expression*

201 With a few notable exceptions (*e.g.* Lin et al., 2017), little is known about the expression of the  
202 various insulin-like peptides in either echinoderms or hemichordates and except for the GSS our  
203 knowledge of their functions is also very limited. Expression data may reveal some preliminary clues  
204 as to where and when they are expressed and thus provide a hint as to their function. For this reason the  
205 number of reads corresponding to the various insulin-related peptides and their putative receptors was  
206 determined in a number of SRAs that might provide evidence as to the time and tissue specific  
207 expression of these proteins. The analysis was performed as described previously (Veenstra, 2020b)  
208 and the data are supplied in Spreadsheet S2.

209

210

## 211 **Results**

212 *Peptides related to insulin and IGF*



213 Some protein sequences were found in the NCBI database, but several of them contain errors or are  
214 incomplete. Where possible these were corrected and/or completed using the methods described above.  
215 As there is only a single crinoid genome assembly available, transcriptome data from the three crinoid  
216 species *Antedon mediterranea*, *Florometra serratissima* and *Oligometra serripinna* were also included.  
217 For the same reason transcriptome data from the brittle star *Amphiura filliformis*, *Ophioderma*  
218 *brevispina* and the hemichordate *Schizocardium californicum* were likewise analyzed. Obviously,  
219 transcriptome data can only demonstrate the presence of gene but not its absence and their usefulness  
220 depends largely on the variety of tissues sampled and the expression levels of the genes of interest.  
221 Nevertheless, such data often provide additional sequences that even if they are incomplete increase the  
222 robustness of sequence comparisons.

223 Insulin-like peptide precursors are typically characterized as having A, B and C domains that  
224 correspond to the A- and B-chains of insulin and the connecting peptide respectively. In IGF D and E  
225 domains are also recognized, in which the D domain refers to the extension of the A chain and the E  
226 domain to part of the precursor after the D domain that is cleaved from IGF in the Golgi apparatus. For  
227 *dilp7* orthologs it is appropriate to add an F (front) domain for the sequence in N-terminal of the B-  
228 chain that in some peptides is not only larger, but also well conserved (Fig. 1).

229 Previous work on insulin-related peptides in in echinoderms have identified two different types of  
230 insulin-like peptides, gonad-stimulating substances (GSS) and insulin-like growth factors (Mita et al.,  
231 2009; Perillo & Arnone, 2014; Semmens et al., 2016; Smith et al., 2019). The insulin-like growth  
232 factors, but not GSS, are also present in hemichordates. While only a single IGF gene was found in the  
233 crinoids and hemichordates, other ambulacrarians have two such genes (Figs. 2, S1, S2; Spreadsheet  
234 S1). These proteins have large C-terminal extension that are rich in charged amino acid residues,  
235 especially arginine and lysine, but also aspartic and glutamic acid residues. A comparison of the protein  
236 sequences and cDNAs from human IGFs identifies the exact separation between the D and E domains  
237 in these proteins (Humbel, 1990). However, although the corresponding sequences of the hemichordate  
238 and echinoderm IGFs contain numerous arginine and lysine residues (Figs. 2, S1, S2), there are no  
239 obvious convertase cleavage sites as many potential arginine residues are succeeded by residues known  
240 to inhibit such enzymes in vertebrates. It is thus not impossible that the D domains of these proteins are  
241 much larger than in the vertebrate IGFs and if so likely contain numerous positively charged amino  
242 acid residues. There are few transcriptome SRAs for specific tissues, the data that is available suggest  
243 that the IGFs are expressed by many tissues, with the ovary showing significant expression. *Patiria*

244 *pectinifera* is the only species with follicle cell specific SRAs and IGF-1 is strongly expressed by these  
245 cells and is probably transferred to the oocyte (Spreadsheet S2).

246 The GSS are known to induce oocyte maturation and ovulation in a two step process, where GSS  
247 stimulates the follicle cells to produce 1-methyladenine which subsequently induces resumption of  
248 meiosis in the oocyte and about 30 minutes later this is followed by ovulation (Chiba, 2020).  
249 Interestingly, GSS was not found in either the genome nor the extensive transcriptome data from the  
250 feather star *Anneissia japonica* and was similarly not encountered in the transcriptomes of three other  
251 crinoids (Suppl data). Transcriptomes may miss expression of some genes and large genome assemblies  
252 are never perfect. The short sequence reads in the genomic SRAs from *Anneissia* were therefore also  
253 analyzed for the presence of GSS, but again no evidence for such a gene was found. This peptide is  
254 thus likely absent from *Anneissia* and perhaps all Crinoidea. In the Holothuroidea and the Asterozoa,  
255 but not the Echinoidea, this gene is duplicated with the two paralogous peptides showing significant  
256 sequence variability (Figs. 3, S3, S4; Spreadsheet S1). As for all these peptides and their putative  
257 receptors expression data is very limited, but in *Apostichopus* the two GSSs are differentially  
258 expressed, with GSS-1 being expressed at specific stages during embryonic development as well as by  
259 muscle and GSS-2 strongly expressed by both the ovary and the testes. Interestingly, it is the ortholog  
260 of GSS-1 that in *Holothuria scabra* has been tested for biological activity and induces ovulation (Chieu  
261 et al., 2019). This makes one wonder what the effects of GSS-2 on ovulation might be in this species.  
262 However, *Apostichopus* was the only species where a significant GSS expression was found in the  
263 gonads (Spreadsheet S2).

264 Two other insulin-like peptides are commonly present in both hemichordates and echinoderms,  
265 including the Crinoidea. The first is an ortholog *dilp7* which has a very characteristic F domain while  
266 its A chain is also remarkably well conserved (Figs. 4, S5, S6; Spreadsheet S1). The precursors of this  
267 peptide contain typical neuroendocrine KR convertase sites and seems to have its highest expression in  
268 the nervous system, although it is also found in other tissues. During embryogenesis its expression  
269 occurs relatively late (Spreadsheet S2). The second peptide present in all ambulacrarians has been  
270 called octinsulin as it has eight cysteine residues and is thus predicted to have four rather than three  
271 disulfide bridges. In echinoderms octinsulin is a single copy gene, but hemichordates have several such  
272 genes (Fig. 5, S7, S8; Spreadsheet S1). Octinsulin expression levels are the highest in nervous tissue,  
273 and significant expression is also found in the gut and stomach of *Strongylocentrotus* and *Patiria*

274 *pectinifera* respectively. Although virtually absent from normal gut in *Apostichopus*, it has significant  
275 expression during gut regenerating in this species (Spreadsheet S2).

276 The Asterozoa have genes coding for a fifth type of insulin, that is usually present in multiple  
277 copies and that are referred to as multinsulins. The predicted peptides share structural similarity with  
278 the *dilp7* orthologs and their genes have typically four coding exons rather than the two or three of the  
279 other *irp* genes. The sprawl of these peptides is perhaps best illustrated by a phylogenetic tree that  
280 suggest independent multiplication of these genes in several species (Fig. S10). Within a single species  
281 the various multinsulins thus often seem more closely related to one another than to their putative  
282 orthologs of other Asterozoa. Some of the multinsulins, like the octinsulins, have acquired two  
283 additional cysteine residues and are thus predicted to have four disulfide bridges, but the location of  
284 these additional cysteine residues differs from that in octinsulins (Figs. 6, 7, S9, S10; Spreadsheet S1).  
285 Like *dilp7* the multinsulins have typical neuroendocrine KR convertase cleavage sites and can thus be  
286 expected to be expressed in neuroendocrine and/or enteroendocrine cells but expression data on *P.*  
287 *pectinifera* suggest a relatively ubiquitous expression in several tissues.

288 The genome assemblies of *A. planci* and *Pisaster ochraceus* shows these genes to be clustered in  
289 the genome and some RNAseq sequences suggests that at least on occasion coding exons from different  
290 genes may be combined (Fig. S10). This and the large numbers of SNPs typically present in animals  
291 caught in nature and used for RNAseq preparation make it impossible to reliably determine their exact  
292 numbers.

293 Genome assemblies allow identification of the introns in these genes. All insulin genes have a  
294 characteristic phase 1 intron somewhere in the conceptual C domain of these molecules. This is the  
295 only intron in the coding sequences of the octinsulin and GSS genes. The IGF genes have a phase 0  
296 intron near the end of the coding sequence and at least some of them have another phase 1 intron just  
297 after the transcription start site. The genes coding for the *dilp7* orthologs and multinsulins share an  
298 additional phase 2 intron and the multinsulin genes have yet another phase 1 intron. All these introns  
299 appear perfectly conserved (Fig. 7).

300

### 301 *Synteny of genes producing insulin-like peptides*

302 In the *Strongylocentrotus* genome all five genes are located on the same chromosome, with the two  
303 IGF genes and those encoding octinsulin and *dilp7* orthologs next to one another and GSS at a distance  
304 of 6,000,000 bp (base pairs). At least the *Anneissia* octinsulin and IGF genes are likely located next to

305 one another on the same chromosome also, as in the current genome assembly two of the three coding  
306 exons of IGF and one of the two octinsulin coding exons are located within about 10,000 bp. The three  
307 missing exons of these two genes are all located on minicontigs of less than 2,000 bp, as is one of the  
308 coding exons for the *dilp7* ortholog. The contigs of the *Lytechinus variegatus* genome assembly are  
309 smaller and this may explain why in this species the genes are located on three different scaffolds, with  
310 the two ILGF-like peptides and the octinsulin together on a single contig. However in the recently  
311 published genome of the closely related *L. pictus* (Warner et al., 2021) the *dilp7* ortholog is also closely  
312 associated with the other three genes. The GSS gene is on the same chromosome but at a distance of  
313 28,000,000 bp. In the *Apostichus japonicus* genome assembly the genes encoding the octinsulin and the  
314 two IGF genes are located on the same contig, and the other genes each on a different one. In the draft  
315 *Holothuria glaberrima* genome assembly only the two IGF genes are located on the same contig,  
316 however in a single Oxford nanopore read (SRR9125585.2851.1) from *H. scabra* the octinsulin, *dilp7*  
317 and two IGF genes are located next to one another as well (Fig. 8).

318 Whereas the various Echinozoa genome assemblies suggest a certain degree of synteny with regard  
319 to the various *irp* genes, the Asterozoa genome shows that such synteny is disintegrating. This is most  
320 clearly demonstrated in the genome assemblies from *Pisaster ochraceus* and *Acanthaster planci*, where  
321 the scaffolds are much larger than from *Patiria miniata*. In these species synteny is largely lost (Fig. 8).  
322 Interestingly the various multinsulin genes are present in small clusters on different chromosomes in  
323 those species.

324

#### 325 *Sequence similarity tree peptides related to insulin*

326 Peptides having the characteristic insulin signature are notoriously variable in their primary amino  
327 acid sequences. Although the various residues allows one to align those sequences, such alignments  
328 will not always yield reliable phylogenetic trees as the basic tenet of such analyses is often not met. As  
329 an alternative I have proposed to use “sequence similarity trees”. Such trees are constructed using the  
330 same methods but do not pretend to illustrate phylogenetic relations, rather similarities between the  
331 different proteins.

332 The structures of the multinsulins are most similar to the *dilp7* orthologs (Fig. 6) and so it is not  
333 surprising that the sequence similarity tree (Fig. 9) groups the multinsulins with the *dilp7* orthologs.  
334 The hypothesis that this structural similarity between these two types of peptides may reflect a close  
335 evolutionary relationship is reinforced by the presence of an intron that is present in the genes encoding

336 these peptides but lacking in the genes encoding octinsulin, IGF and GSS (Fig. 7). The tree also  
337 illustrates significant sequence similarity between GSS and the IGF.

338

#### 339 *Orthologs of receptors for irps: Receptor tyrosine kinase*

340 A single insulin RTK gene was found in all species analyzed here. An alternatively spliced form is  
341 present in *Acanthaster* and is likely commonly present in echinoderms (Spreadsheet S1). Hundreds of  
342 ambulacrarian protein sequences were identified at NCBI using a BLAST search with the *S. kovalevskii*  
343 protein kinase domain as a query. After aligning them with Clustal omega the protein kinase domains  
344 were used to make a phylogenetic tree. Results revealed no other known or predicted proteins with a  
345 similar protein kinase domain (data not shown). The insulin RTK is ubiquitously expressed  
346 (Spreadsheet S2).

347

#### 348 *Orthologs of receptors for irps peptides: LGRs*

349 LGR sequences were obtained using the combination of genomic sequences and, where available,  
350 transcriptome shotgun sequences and RNAseq SRAs. The latter were used to produce contigs using  
351 Trinity (Spreadsheet S1). Short read assemblers are good in combining sequences into larger  
352 continuous ones, but they do produce artifacts, which are more easily obtained when very similar  
353 sequences are present in multiple copies, such as the multinsulins, or the numerous LDLa and LRR  
354 repeats. These repeats are usually individually coded by single exons that are sometimes skipped and  
355 when such skipped individual reads enter in the RNAseq SRA, incorrect constructs are obtained.  
356 Furthermore, these repeats are present in numerous proteins, and from time to time this leads to  
357 assembled sequences that are from mRNA species from different genes. It is therefore to be expected  
358 that not all assembled transcripts, neither those in the databank nor those produced here, will be correct.  
359 Some errors were corrected by challenging divergent sequences that were discovered on comparing  
360 putative orthologs with one another. Other differences could be confirmed as true differences, but it is  
361 not impossible that some errors remain, particularly for those sequences that are incomplete. LGRs that  
362 might function as receptors for the various irps were identified by their homology with such receptors  
363 from vertebrates and arthropods. The transmembrane regions of the GPCRs don't have the assembly  
364 problems of the LDLa and LRR repeats and are the most characteristic domain of the GPCRs. This  
365 makes it easier to construct a phylogenetic trees for these receptors based on their transmembrane  
366 regions than that it is to produce complete LGR transcripts.

367 Results show a surprisingly similar distribution of LGRs in the species studied. The tree resolves  
368 two major branches, one for the glycoprotein hormone receptors, which itself is divided in two  
369 subbranches, one for orthologs of the GPA2/GPB5 receptor - containing the receptors for human TSH,  
370 FSH and LH - and a second one for the bursicon receptor orthologs. All species studied are represented  
371 by one member on each of these two subbranches, except for *Ophiothrix*, where the draft genome  
372 reveals two orthologs each for the bursicon and GPA2/GPB5 receptors (Fig. 10). These are likely  
373 receptors for the bursicon and GPA2/GPB5 orthologs identified from various echinoderm species  
374 (Semmens et al., 2016). It is interesting to see that whereas vertebrates have different receptors for  
375 TSH, FSH and LH, most echinoderms have only one GPA2/GPB5-receptor ortholog (Fig. S11), even  
376 though *A. rubens* has two GPA2 and three GPB5 orthologs (Semmens et al., 2016). The LGRs for the  
377 glycoproteins were included in the search for putative receptors for the ambulacrarian irp LGRs in  
378 order to be sure that no such receptors would be missed.

379 The lower branches of the LGR phylogenetic tree are the ones of interest as they contain receptors  
380 with irp ligands. It consists of three subbranches, that are characterized by *Drosophila* LGR3 and  
381 LGR4 – the receptors for gonadulin and dilp7 respectively - and *Periplaneta* LGR5, an ortholog of  
382 *Lymnaea* GRL101. Here in all ambulacrarian species studied only one ortholog was found for each of  
383 them, despite extensive attempts to find additional LGRs in the various genomes and transcriptomes.

384 The GRL101 transmembrane regions puts it very close to vertebrate glycoprotein hormone and  
385 relaxin LGRs. LRRs are present in many different proteins, but when the LRR part of the *Anneissia*  
386 GRL101 (amino acid residues 576-717) is used as query in a protein BLAST against human proteins,  
387 the glycoprotein hormone and relaxin receptors are identified as most similar to this ectodomain of  
388 GRL101, suggesting that similarity of the GRL101 receptors with vertebrate LGRs is not limited to the  
389 transmembrane region of this GPCR.

390 Sequence alignments of these GPCRs show strong sequence similarity (Figs. S12-S14), however  
391 the dil7 receptor ortholog varies more between species. A schematic representation of the the  
392 ectodomains of the LGRs on this second branch is drawn in Fig. 11. The orthologs of the dilp7 and  
393 gonadulin receptors each have a single LDLa repeat, except for the *Patiria* and *Acanthaster* orthologs  
394 of the dilp7 receptor which both have two LDLa repeats (Fig. S13). This additional LDLa is likely due  
395 to a relatively recent duplication of the LDLa since the two LDLa repeats have very similar amino acid  
396 sequences (Spreadsheet S1). All three receptors are expressed in the nervous system and the gonadulin



397 receptor is well expressed in the gonads, both testis and ovary, and strongly so in the follicle cells of *P.*  
398 *pectinifera* (Spreadsheet 2).

399

## 400 **Discussion**

401 The genomic and transcriptomic data from both the hemichordates and the echinoderms show that  
402 these two groups share three irps, octinsulin, IGF and a dilp7 orthologs, that are present in both  
403 echinoderms and hemichordates. IGF and dilp7 are orthologs of the arthropod peptides that together  
404 with gonadulin originated from a gene triplication. The structure of gonadulin is poorly maintained,  
405 even within insects (Veenstra, 2020b). The variable structure of gonadulin and its loss in many  
406 arthropod lineages suggests that the evolutionary pressure on gonadulin is weak. This may explain why  
407 the amino acid sequence of gonadulin looks significantly different from octinsulin. Nevertheless, there  
408 are two lines of evidence that suggest that these peptides must be orthologs as well. For one, synteny of  
409 the chromosome fragment containing these genes is conserved between the sea urchin  
410 *Strongylocentrotus purpuratus*, the hemichordate *Saccoglossus kowalewski* and the cockroach *Blattella*  
411 *germanica*, suggesting that these peptides are likely orthologs. More importantly, all ambulacrarians  
412 have an ortholog of the gonadulin receptor and the only plausible ligand for such a receptor encoded by  
413 their genomes is octinsulin. Thus the gene triplication previously reported from arthropods must have  
414 occurred in a common bilaterian ancestor of the deuterostomes and protostomes.

415 Crinoids have the simplest irp signaling system, one gene each for IGF, octinsulin and the dilp7  
416 ortholog. Their putative receptors - insulin RTK, GRL101, and the orthologs of the dilp7 and gonadulin  
417 receptors – similarly are also each coded by a single gene. The hemichordates have a very similar  
418 repertoire, except that the octinsulin gene is systematically amplified and in some species the dilp7  
419 ortholog as well. It thus appears likely that the first deuterostome had a single copy of each of these  
420 genes.

421 Within the echinoderms the irp genes evolved considerably, as shown both by an increase in their  
422 numbers and the loss of synteny. Whereas the feather stars appear to have only a single IGF gene, all  
423 other echinoderms have two such genes and two novel irps, GSS and multinsulin, appeared. The GSS  
424 sequences are most similar to those of IGF, suggesting that they evolved from a gene duplication event  
425 from the IGF gene. Although some GSS genes are located on the same chromosome as the other irps,  
426 they are not close to the IGF genes, indicating that the IGF-GSS split was not a local duplication but  
427 may have been the result of an incorrectly repaired chromosome break.

428 In the Asterozoa a fifth type of irp gene emerged, those that code for the multinsulins which share  
429 significant sequence similarity with the dilp7 orthologs. The initial multinsulin gene must thus have its  
430 origin in a gene duplication of the dilp7 ortholog gene, with which they furthermore share a  
431 characteristic intron. Later the multinsulin gene seems to have undergone several additional gene  
432 duplications in this respect the multinsulins resemble the insect neuroendocrine irps.

433 The co-evolution of ligands and receptors allows one to assign the putative receptors for gonadulin,  
434 the dilp7 ortholog and IGF as the orthologs of the receptors of their arthropod orthologs. This allows  
435 the identification of the ambulacrarian LGRs that are the orthologs of the gonadulin and dilp7 receptors  
436 as likely receptors for octinsulin and the dilp7 respectively, as well as the insulin RTK as a receptor for  
437 IGF.

438 The appearance of the multinsulins is not accompanied by the evolution of a novel insulin-receptor.  
439 Some animals have multiple insulin RTKs, *e.g.* some arthropods have up to four such genes (Veenstra,  
440 2020a,b), however, in spite of extensive searches for a second insulin RTK in ambulacrarian genomes,  
441 none was found. Searches for an additional LGR that might function as a receptor for the GSS and/or  
442 multinsulin were unsuccessful and this raises the question which receptors are activated by these  
443 peptides.

444 I have previously argued that the close chromosomal association of the IGF, gonadulin and dilp7  
445 ortholog genes in basal insects suggest that they derived from a gene triplication (Veenstra, 2020b).  
446 There are three possible scenarios that can explain how IGF and gonadulin came to respectively  
447 activate an RTK and an LGR. It is possible that the original irp activated either an RTK and that an  
448 LGR was later acquired as a second receptor by gonadulin, alternatively the original irp activated an  
449 LGR and IGF acquired an RTK as a second receptor. Given the importance of insulin RTKs for growth  
450 in very basal metazoans, it is improbable that the original irp activated an LGR and that an RTK was  
451 acquired much later during evolution (see *e.g.* Mortzfeld et al., 2019). This indicates that an irp  
452 acquired an LGR as a second receptor and the question is whether this happened before or after the  
453 gene triplication that yielded IGF, gonadulin and dilp7. In both *Saccoglossus* and arthropods the IGF  
454 gene is in the middle of the three. This suggests that this represents the gene organisation after the gene  
455 triplication and that the dilp7 and gonadulin orthologs each evolved independently from the arch irp  
456 rather than that dilp7 evolved from gonadulin or *vice versa*. Had dilp7 originated from a gene  
457 duplication of gonadulin or the other way round, they also might have been more similar to one another  
458 than they are. The acquisition of a second receptor must be an extremely rare event. Since both



459 gonadulin and dilp7 use an LGR this would mean that such an extremely rare event of the acquisition  
460 of a second receptor would have occurred not only twice, but even with a very similar receptor.  
461 Furthermore, some metazoans have an LGR that is closely related to the dilp7 and gonadulin LGRs  
462 suggesting that it could be an IGF receptor (see below). It is for these reasons that the author favors the  
463 hypothesis that the arch irp already acted on both an LRG and an RTK, but, clearly, this remains a  
464 hypothesis.

465 The binding of insulin and relaxin to their respective receptors has gotten resolved in much detail  
466 in the last couple of years. The effective binding and stimulation of insulin RTK by the small irp from  
467 the snail *Conus* to the RTK shows that a small irp can be an effective ligand for this receptor (Menting  
468 et al., 2015). On the other hand the complex interaction of relaxin to its LGR makes it more difficult to  
469 imagine a smaller peptide as an effective ligand (Hoare et al., 2019). Furthermore, considering the well  
470 conserved F-domain of the dilp7 receptor orthologs it is likely that it is necessary for interaction with  
471 its LGR receptor. The loss of this structure in multinsulin suggests that it is unlikely to be a dilp7  
472 receptor agonist. On the other hand, the poor sequence conservation in the various *Drosophila* irps that  
473 activate a single RTK is reminiscent of the large structural variability of the multinsulins. This seems to  
474 suggest that the multinsulins are RTK ligands rather than that they activate the LGR.

475 The emergence of the GSS is neither accompanied with the evolution of a novel receptor for these  
476 irps. This can also be explained by assuming that IGF acts on both the RTK and an LGR and that the  
477 GSS have lost their affinity for the LGR. This raises the question whether an IGF LGR might exist.

478 If there were an IGF LGR, one would expect it to be related to the gonadulin and dilp7 receptors.  
479 GRL101 appears a plausible candidate as its transmembrane regions are closely related to the receptors  
480 for gonadulin and dilp7. The ectodomain of GRL101 consists of two parts, a series of LRRs and a  
481 second series of LDLa's. In the related GPCRs the LRRs are expected to bind with the insulin core of  
482 gonadulin and dilp7 orthologs, just like the human relaxin receptors (Hoare et al., 2019). When the  
483 LRR part of the *Anneissia* GRL101, the most basal echinoderm, was used as query for similar human  
484 proteins in a BLAST search, the glycoprotein hormone and relaxin receptors were identified as the  
485 most similar proteins. This shows that the resemblance of GRL101 to the other LGRs is not limited to  
486 the transmembrane regions and reinforces the hypothesis that the ligand of GRL101 has an insulin-like  
487 structure. GRL101 has a large number of LDLa's, the ligands of which are typically positively charged  
488 surfaces, which in the case of proteins consist of Lys and Arg residues (Daly et al., 1995; Prévost &  
489 Raussens, 2004; Fisher, Beglova & Blacklow, 2006; Yasui, Nogi & Takagi, 2010; Dagil et al., 2013).

490 Thus the ligand of GRL101 may consist of two parts, an insulin-like structure and a piece with several  
491 positive charges that interact with the LDLa's. The C-terminal tails of the IGFs, whether from  
492 arthropods, echinoderms or hemichordates, are all rich in charged amino acid residues. The C-terminal  
493 tail of IGF with its numerous positively charged amino acid residue might interact with the LDLa's of  
494 GRL101. I therefore posit that in those species that have a GRL101 it functions as the second receptor  
495 for IGF. The absence of such a tail in GSS would make it likely that it acts on the RTK rather than an  
496 IGF GPCR.

497 The suggestion that GSS activates the RTK goes against the hypothesis that these peptides act  
498 through GPCRs. Indeed it has recently been proposed that it is the ortholog of the dilp7 receptor that  
499 would be activated by the gonad stimulator in *P. miniata* (Mita et al., 2020). Given the clear orthology  
500 of both the dilp7 echinoderm orthologs with the *Drosophila* peptide and the similar orthology between  
501 the dilp7 receptor and the echinoderm receptor, the conclusion that the two constitute a functional  
502 ligand receptor combination seems inescapable. It was impossible to find a GSS in either the genome  
503 assembly or the individual reads of all the genomic SRAs of *Anneissia japonica*, yet it does have a  
504 dilp7 receptor ortholog, thus if the dilp7 receptor were to function as a GSS receptor, it most likely  
505 would not be an exclusive receptor. *A priori* this does not exclude the possibility that GSS could  
506 function as a ligand for the same receptor. As mentioned above, since the dilp7 orthologs have well  
507 conserved F domains, one has to assume that it is important for binding to its receptor. Since this  
508 domain is absent from RTK ligands, it is difficult to understand how GSS that similarly lacks this  
509 domain would be able to bind the dilp7 receptor. It would thus seem unlikely that peptides as different  
510 as GSS and dilp7 would be effective ligands of the same LGR. Furthermore, the GSS genes have been  
511 duplicated and their structures have diverged considerably. Those duplicate gonad stimulators are  
512 present in many species and have not been selected against. Hence they must be physiologically  
513 relevant and able to interact with a receptor. Sharing a common evolutionary origin the two gonad  
514 stimulators should be expected to act either on the same or paralogous receptors, but the number of  
515 putative echinoderm receptors for irps is limited, so it must be the same one. The same arguments that  
516 were used to argue that the multinsulins are likely RTK agonists but not LGR ligands, are therefore  
517 equally valid here and suggest that GSS is an RTK ligand.

518 Furthermore, the experimental evidence that GSS stimulates the ortholog of the dilp7 receptor is not  
519 convincing. The reported response to the dilp7 receptor when expressed in Sf9 cells is very weak and  
520 does not represent a typical response seen in this type of assay. Although the authors have shown high

521 affinity binding of GSS to the follicle cells, such high affinity binding should also have been present in  
522 the Sf9 cells expressing the putative GSS receptor, but this was not reported. The follicle cell SRAs  
523 from which the putative GSS receptor was identified contains large amounts of RNAseq reads for the  
524 gonadulin receptor, a receptor that is more closely related to the vertebrate relaxin receptors than the  
525 dilp7 receptor, but surprisingly the authors do not mention this receptor, which they must have found  
526 (Mita et al., 2020).

527 I suggest that initially there was an IGF-like hormone that activated both a GPCR and an RTK,  
528 after two gene duplications some of the descendant ligands either lost their C-terminal tails or one  
529 acquired a larger one and this allowed all three ligands to activate, at least initially, the RTK while each  
530 acquired its own LGR. Later, some of the ligands may have lost their affinity for one receptor. Since  
531 the primary amino acid sequence of gonadulin is very different from that of the other irps, it likely lost  
532 its capacity to activate the RTK (Fig. 12). Holometabolous insect species have lost GRL101 and hence  
533 in those species IGF can only act on the RTK. Under this hypothesis the arginine-rich C-terminal tail  
534 would be useless in such insect species and in higher flies, such as *Drosophila*, it was indeed lost  
535 (Veenstra, 2020b). In vertebrates, there is no GRL101 and so IGF can only activate the two RTKs,  
536 while the relaxin related peptides are not known to interact with RTK. The presence of a similar  
537 arginine-rich E domain of the vertebrate IGF precursors might thus be an evolutionary relict.

538 This scheme raises the question as to how the functions of these two receptors activated by IGF  
539 might differ. IGF and the drosophila irps stimulate growth, the echinoderm GSS stimulates oocyte  
540 maturation and ovulation (Mita et al., 2009), relaxin and INSL3 affect various developmental and  
541 reproductive processes (Ivell et al., 2020; Esteban-Lopez & Agoulnik, 2020), gonadulin is expressed by  
542 the gonads as well as the imaginal in flies (Garelli et al., 2012; Liao & Nässel, 2020; Veenstra, 2020b;  
543 Veenstra et al., 2021) and dilp7 is expressed in a sex specific manner (Miguel-Aliaga, Thor & Gould,  
544 2008; Yang et al., 2008; Castellanos, Tang & Allan, 2013). These hormones stimulate growth,  
545 development and reproduction, processes that are intimately linked; without growth and development  
546 reproduction is impossible and growth without reproduction is useless in sexually reproducing species.  
547 On the other hand, resources used for growth and development can not be used for reproduction or *vice*  
548 *versa*.

549 Growth is rarely a linear process independent of development; animals are not only getting bigger,  
550 but they also mature into adults. Metamorphosis is markedly different between hemi- and holo-  
551 metabolous insect species. Every time a cockroach nymph molts, it becomes a little more adult,

552 however during the first molts of a caterpillar the insects mainly become bigger, it is only when it molts  
553 into a pupa that it significantly changes its morphology. Cockroaches have GRL101, caterpillars don't.  
554 This suggests that the RTK might be more directed toward linear growth, or allowing growth by  
555 increasing uptake of resources, such as glucose and amino acids, while the LGRs might be more  
556 important for insuring that the animal develops into an adult and becomes sexually competent. Both  
557 holometabolous insects and vertebrates have lost GRL101 and use steroid hormones to induce sexual  
558 maturation. Interestingly, in vertebrates the production of steroid hormones is controlled by  
559 glycoprotein hormones, the second group of ligands for LGRs.

560 It is plausible that IGF in an early bilaterian was produced by the tissue that stored energy and  
561 perhaps even protein as insects do in the form of storage proteins (Haunerland, 1996). Production and  
562 release of IGF might have happened when the animal had sufficient resources to allow for growth  
563 and/or reproduction. In arthropods growth has become a discontinuous process in which a new cuticle  
564 needs to be made before molting can take place. In those species IGF produced by the fat body may  
565 well be the essential growth hormone. However, if the animal is suddenly starved, IGF would no longer  
566 be released. If formation of a new cuticle is too advanced to be interrupted, this become problematic. It  
567 may have obliged the brain to take at least partial control of growth away from the fat body by  
568 releasing one or more of the neuroendocrine irps to force growth and molting to proceed. It is possible  
569 that this achieved by simultaneously reducing growth of organs that are needed for (sexual) maturation  
570 but not essential for immediate survival, like the gonads. This could be how the neuroendocrine insect  
571 irps initially evolved. In echinoderms IGF probably stimulates growth of the follicles and oocytes, but  
572 the final growth spurt, the one that permits resumption of meiosis in the oocytes and subsequent  
573 ovulation, is delayed until optimal conditions to do so prevail. When the time and place are right the  
574 nervous system releases GSS likely in large amounts to finish the maturation process and induce  
575 ovulation. In vertebrates, growth and the release of IGF has also been brought under control of the  
576 brain but more forcefully by bringing IGF secretion by the liver under control of growth hormone.  
577 Whereas in an early ancestor high plasma concentrations of insulin might have led to secretion of IGF,  
578 this is no longer the case. Here insulin may have evolved to insure that plasma concentrations of  
579 glucose are kept sufficiently low by insuring its absorption by tissues in order to avoid its loss by  
580 excretion. In the three cases these peptides have very different functions, ovulation in echinoderms,  
581 sparing glucose in vertebrates and rescuing interrupted growth in insects. It is plausible then that these  
582 hormones each evolved from a non-local IGF gene duplication and that they are thus not proper

583 orthologs but evolved by convergent evolution. This hypothesis would explain, why there is no insulin  
584 gene located near the IGF, octinsulin/gonadulin and dilp7 triplet in cockroaches, echinoderms and  
585 hemichordates, even though insulin – and other peptides such as the insect neuroendocrine insulin-like  
586 peptides and GSS - almost certainly evolved from IGF much later.

587

## 588 **Conclusions**

589 The gene triplication previously reported from arthropods must have occurred in a common  
590 bilaterian ancestor of the deuterostomes and protostomes. The hypothesis that IGF in an ancestral  
591 bilaterian used both a GPCR and an RTK may explain the combination of echinoderm irps and putative  
592 insulin receptors. This hypothesis implies that insulin is not a hormone that evolved before the split  
593 between protostomes and deuterostomes, but that insulin-like peptides evolved independently in  
594 different metazoan clades as miniature copies of IGF capable to activate the RTK but unable to  
595 stimulate the LGR.

596

## 597 **Acknowledgements**

598 This manuscript benefited from the critical contributions of an editor and two reviewers for which I  
599 am most grateful. Work like this is only possible because others made their transcriptome and genomic  
600 sequences publicly available. I express my sincere gratitude to all of them.

601

## 602 **References**

603

- 604 Almagro Armenteros JJ, Tsirigos KD, Sønderby CK, Petersen TN, Winther O, Søren Brunak S, von  
605 Heijne G, and Nielsen H. 2019. SignalP 5.0 improves signal peptide predictions using deep neural  
606 networks. *Nat Biotechnol.* 37:420-423, doi:10.1038/s41587-019-0036-z.
- 607
- 608 Castellanos MC, Tang JC, Allan DW. 2013. Female-biased dimorphism underlies a female-specific role  
609 for post-embryonic *ilp7* neurons in *Drosophila* fertility. *Development.* 140:3915-3926. doi:  
610 10.1242/dev.094714.
- 611
- 612 Chiba K, 2020. Oocyte maturation in starfish. *Cells* 9, 476. doi:10.3390/cells9020476.
- 613
- 614 Chieu HD, Turner L, Smith MK, Wang T, Nocillado J, Palma P, Suwansa-Ard S, Elizur A, Cummins  
615 SF. 2019. Aquaculture breeding enhancement: Maturation and spawning in sea cucumbers using a  
616 recombinant relaxin-like sonad-stimulating peptide. *Front Genet.* 10:77. doi:  
617 10.3389/fgene.2019.00077.

618

619 Colombani J, Andersen DS, Boulan L, Boone E, Romero N, Virolle V, Texada M, Léopold P. 2015.  
620 *Drosophila* Lgr3 couples organ growth with maturation and ensures developmental stability. *Curr Biol*.  
621 25:2723-2729. doi: 10.1016/j.cub.2015.09.020.

622

623 Dagil R, O'shea C, Nykjær A, Bonvin AM, Kragelund BB. 2013. Gentamicin binds to the megalin  
624 receptor as a competitive inhibitor using the common ligand binding motif of complement type repeats  
625 insight from the NMR structure of the 10th complement type repeat domain alone and in complex with  
626 gentamicin. *J. Biol. Chem.* 288, 4424–4435. doi: 10.1074/jbc.M112.434159.

627

628 Daly NL, Scanlon MJ, Djordjevic JT, Kroon PA, Smith R. 1995. Three-dimensional structure of a  
629 cysteine-rich repeat from the low-density lipoprotein receptor. *Proc Natl Acad Sci U S A.* 92:6334-8.  
630 doi: 10.1073/pnas.92.14.6334.

631

632 Davidson PL, Guo H, Wang L, Berrio A, Zhang H, Chang Y, Soborowski AL, McClay DR, Fan G,  
633 Wray GA. 2020. Chromosomal-level genome assembly of the sea urchin *Lytechinus variegatus*  
634 substantially improves functional genomic analyses. *Genome Biol Evol.* 12:1080-1086. doi:  
635 10.1093/gbe/evaa101.

636

637 Devi L. 1991. Consensus sequence for processing of peptide precursors at monobasic sites. *FEBS Lett*  
638 280:189–194. doi: 10.1016/0014-5793(91)80290-j.

639

640 Esteban-Lopez M, AgoulNIK AI, 2020. Diverse functions of insulin-like 3 peptide. *J Endocrinol.*  
641 247:R1-R12. doi: 10.1530/JOE-20-0168.

642

643 Garelli A, Gontijo AM, Miguela V, Caparros E, Dominguez M. 2012. Imaginal discs secrete insulin-  
644 like peptide 8 to mediate plasticity of growth and maturation. *Science.* 336:579-582. doi:  
645 10.1126/science.1216735.

646

647 Garelli A, Heredia F, Casimiro AP, Macedo A, Nunes C, Garcez M, Dias ARM, Volonte YA, Uhlmann  
648 T, Caparros E, Koyama T, Gontijo AM. 2015. Dilp8 requires the neuronal relaxin receptor Lgr3 to  
649 couple growth to developmental timing. *Nat Commun.* 6:8732. doi: 10.1038/ncomms9732.

650

651 Fisher C, Beglova N, Blacklow SC. 2006. Structure of an LDLR-RAP complex reveals a general mode  
652 for ligand recognition by lipoprotein receptors. *Molecular Cell* 22, 277–283. doi:  
653 10.1074/jbc.M112.434159.

654

655 Grabherr MG, Haas BJ, Yassour M, Levin JZ, Thompson DA, Amit I, Adiconis X, Fan L,  
656 Raychowdhury R, Zeng Q, Chen Z, Mauceli E, Hacohen N, Gnirke A, Rhind N, di Palma F, Birren  
657 BW, Nusbaum C, Lindblad-Toh K, Friedman N, Regev A. 2011. Full-length transcriptome assembly  
658 from RNA-Seq data without a reference genome. *Nat Biotechnol.* 15;29:644-652. doi:  
659 10.1038/nbt.1883.

660

661 Hall MR, Kocot KM, Baughman KW, Fernandez-Valverde SL, Gauthier MEA, Hatleberg WL,  
662 Krishnan A, McDougall C, Motti CA, Shoguchi E, Wang T, Xiang X, Zhao M, Bose U, Shinzato C,  
663 Hisata K, Fujie M, Kanda M, Cummins SF, Satoh N, Degnan SM, Degnan BM. 2017. The crown-of-



- 664 thorns starfish genome as a guide for biocontrol of this coral reef pest. *Nature*. 544:231-234. doi:  
665 10.1038/nature22033.
- 666
- 667 Haunerland NH, 1996. Insect storage proteins: gene families and receptors. *Insect Biochem Mol Biol*.  
668 26:755-65. doi: 10.1016/s0965-1748(96)00035-5.
- 669
- 670 Hoare BL, Bruell S, Sethi A, Gooley PR, Lew MJ, Hossain MA, Inoue A, Scott DJ, Bathgate  
671 RAD.2019. Multi-component mechanism of H2 Relaxin binding to RXFP1 through NanoBRET kinetic  
672 analysis. *iScience*. 2019 Jan 25;11:93-113. doi: 10.1016/j.isci.2018.12.004.
- 673
- 674 Hsueh AJW, Feng Y, 2020. Discovery of polypeptide ligand-receptor pairs based on their co-evolution.  
675 *FASEB J*. 34:8824-8832. doi: 10.1096/fj.202000779R.
- 676
- 677 Humbel RE, 1990. Insulin-like growth factors I and II. *Eur J Biochem*. 190:445-62. doi:  
678 10.1111/j.1432-1033.1990.tb15595.x.
- 679
- 680 Imambocus BN, Wittich A, Tenedini F, Zhou F, Hu C, Sauter K, Varela EM, Herédia F, Casimiro AP,  
681 Macedo A, Schlegel P, Yang CH, Miguel-Aliaga I, Pankratz MJ, Gontijo AM, Cardona A, Soba P,  
682 2020. Discrete escape responses are generated by neuropeptide-mediated circuit logic. *bioRxiv preprint*  
683 doi:10.1101/2020.09.22.307033.
- 684
- 685 Ivell R, Alhujaili W, Kohsaka T, Anand-Ivell R. 2020. Physiology and evolution of the INSL3/RXFP2  
686 hormone/receptor system in higher vertebrates. *Gen Comp Endocrinol*. 299:113583. doi:  
687 10.1016/j.ygcen.2020.113583.
- 688
- 689 Jo J, Oh J, Lee HG, Hong HH, Lee SG, Cheon S, Kern EMA, Jin S, Cho SJ, Park JK, Park C. 2017.  
690 Draft genome of the sea cucumber *Apostichopus japonicus* and genetic polymorphism among color  
691 variants. *Gigascience*. 6:1-6. doi: 10.1093/gigascience/giw006.
- 692
- 693 Liao S, Nässel DR. 2020. *Drosophila* insulin-like peptide 8 (DILP8) in ovarian follicle cells regulates  
694 ovulation and metabolism. *bioRxiv*. doi: 10.1101/2020.05.02.073585.
- 695
- 696 Lin M, Mita M, Egertová M, Zampronio CG, Jones AM, Elphick MR., 2017. Cellular localization of  
697 relaxin-like gonad-stimulating peptide expression in *Asterias rubens*: New insights into neurohormonal  
698 control of spawning in starfish. *J Comp Neurol*. 525:1599-1617. doi: 10.1002/cne.24141.
- 699
- 700 Linneweber GA, Jacobson J, Busch KE, Hudry B, Christov CP, Dormann D, Yuan M, Otani T, Knust E,  
701 de Bono M, Miguel-Aliaga I., 2014. Neuronal control of metabolism through nutrient-dependent  
702 modulation of tracheal branching. *Cell* 16;156:69-83. doi: 10.1016/j.cell.2013.12.008.
- 703
- 704 Menting JG, Gajewiak J, MacRaild CA, Chou DH, Disotuar MM, Smith NA, Miller C, Erchegyi J,  
705 Rivier JE, Olivera BM, Forbes BE, Smith BJ, Norton RS, Safavi-Hemami H, Lawrence MC., 2015. A  
706 minimized human insulin-receptor-binding motif revealed in a *Conus geographus* venom insulin. *Nat*  
707 *Struct Mol Biol*. 23:916-920. doi: 10.1038/nsmb.3292.
- 708
- 709 Miguel-Aliaga I, Thor S, Gould AP. 2008. Postmitotic specification of *Drosophila* insulinergic neurons  
710 from pioneer neurons. *PLoS Biol* 6: e58. doi:10.1371/journal.pbio.0060058.

711  
712 Mirabeau O, Joly JS. 2013. Molecular evolution of peptidergic signaling systems in bilaterians.  
713 Proc Natl Acad Sci U S A. 110: E2028-37. doi: 10.1073/pnas.1219956110.  
714  
715 Mita M, Yoshikuni M, Ohno K, Shibata Y, Paul-Prasanth B, Pitchayawasin S, Isobe M, Nagahama Y.  
716 2009. A relaxin-like peptide purified from radial nerves induces oocyte maturation and ovulation in the  
717 starfish, *Asterina pectinifera*. Proc Natl Acad Sci U S A. 106:9507-12. doi: 10.1073/pnas.0900243106.  
718  
719 Mita M, Matsubara S, Osugi T, Shiraishi A, Wada A, Satake H. 2020. A novel G protein-coupled  
720 receptor for starfish gonadotropic hormone, relaxin-like gonad-stimulating peptide. PLoS One.  
721 15:e0242877. doi: 10.1371/journal.pone.0242877.  
722  
723 Mortzfeld BM, Taubenheim J, Klimovich AV, Fraune S, Rosenstiel P, Bosch TCG. 2019. Temperature  
724 and insulin signaling regulate body size in Hydra by the Wnt and TGF-beta pathways. Nat Commun.  
725 10:3257. doi: 10.1038/s41467-019-11136-6.  
726  
727 Perillo M, Arnone MI. 2014. Characterization of insulin-like peptides (ILPs) in the sea urchin  
728 *Strongylocentrotus purpuratus*: insights on the evolution of the insulin family. Gen Comp Endocrinol.  
729 205:68-79. doi: 10.1016/j.ygcen.2014.06.014.  
730  
731 Prévost M, Raussens V. 2004. Apolipoprotein E-low density lipoprotein receptor binding: study of  
732 protein-protein interaction in rationally selected docked complexes. Proteins 55:874-84. doi:  
733 10.1002/prot.20080.  
734  
735 Price MN, Dehal PS, Arkin AP. 2010. FastTree 2--approximately maximum-likelihood trees for large  
736 alignments. PLoS One. 5:e9490. doi: 10.1371/journal.pone.0009490.  
737  
738 Rholam M, Brakch N, Germain D, Thomas DY, Fahy C, Boussetta H, Boileau G, Cohen P. 1995. Role  
739 of amino acid sequences flanking dibasic cleavage sites in precursor proteolytic processing. The  
740 importance of the first residue C-terminal of the cleavage site. Eur J Biochem. 227:707-714. doi:  
741 10.1111/j.1432-1033.1995.tb20192.x.  
742  
743 Ruiz-Ramos DV, Schiebelhut LM, Hoff KJ, Wares JP, Dawson MN. 2020. An initial comparative  
744 genomic autopsy of wasting disease in sea stars. Mol Ecol. 29:1087-1102. doi: 10.1111/mec.15386.  
745  
746 Rutherford K, Parkhill J, Crook J, Horsnell T, Rice P, Rajandream MA, Barrell B. 2000. Artemis:  
747 sequence visualization and annotation. Bioinformatics 16:944-5. doi:  
748 10.1093/bioinformatics/16.10.944.  
749  
750 Sea Urchin Genome Sequencing Consortium. 2006. The genome of the sea urchin *Strongylocentrotus*  
751 *purpuratus*. Science 314: 941-952.  
752  
753 Semmens DC, Mirabeau O, Moghul I, Pancholi MR, Wurm Y, Elphick MR. 2016. Transcriptomic  
754 identification of starfish neuropeptide precursors yields new insights into neuropeptide evolution. Open  
755 Biol. 6:150224. doi: 10.1098/rsob.150224.  
756



- 757 Sievers F, Wilm A, Dineen D, Gibson TJ, Karplus K, Li W, Lopez R, McWilliam H, Remmert M,  
758 Söding J, Thompson JD, Higgins DG. 2011. Fast, scalable generation of high-quality protein multiple  
759 sequence alignments using Clustal Omega. *Mol Syst Biol.* 7:539. doi: 10.1038/msb.2011.75.  
760
- 761 Simakov O, Kawashima T, Marlétaz F, Jenkins J, Koyanagi R, Mitros T, Hisata K, Bredeson J,  
762 Shoguchi E, Gyoja F, Yue JX, Chen YC, Freeman RM Jr, Sasaki A, Hikosaka-Katayama T, Sato A,  
763 Fujie M, Baughman KW, Levine J, Gonzalez P, Cameron C, Fritzenwanker JH, Pani AM, Goto H,  
764 Kanda M, Arakaki N, Yamasaki S, Qu J, Cree A, Ding Y, Dinh HH, Dugan S, Holder M, Jhangiani SN,  
765 Kovar CL, Lee SL, Lewis LR, Morton D, Nazareth LV, Okwuonu G, Santibanez J, Chen R, Richards S,  
766 Muzny DM, Gillis A, Peshkin L, Wu M, Humphreys T, Su YH, Putnam NH, Schmutz J, Fujiyama A,  
767 Yu JK, Tagawa K, Worley KC, Gibbs RA, Kirschner MW, Lowe CJ, Satoh N, Rokhsar DS, Gerhart J.  
768 2015. Hemichordate genomes and deuterostome origins. *Nature.* 527:459-465. doi:  
769 10.1038/nature16150.  
770
- 771 Smith MK, Chieu HD, Aizen J, Mos B, Motti CA, Elizur A, Cummins SF. 2019. A Crown-of-Thorns  
772 Seastar recombinant relaxin-like gonad-stimulating peptide triggers oocyte maturation and ovulation.  
773 *Gen Comp Endocrinol.* 281:41-48. doi: 10.1016/j.ygcen.2019.05.009.  
774
- 775 Tensen CP, Van Kesteren ER, Planta RJ, Cox KJ, Burke JF, van Heerikhuizen H, Vreugdenhil E. 1994.  
776 A G protein-coupled receptor with low density lipoprotein-binding motifs suggests a role for  
777 lipoproteins in G-linked signal transduction. *Proc Natl Acad Sci U S A.* 91:4816-4820. doi:  
778 10.1073/pnas.91.11.4816.  
779
- 780 Vallejo DM, Juarez-Carreño S, Bolivar J, Morante J, Dominguez M. 2015. A brain circuit that  
781 synchronizes growth and maturation revealed through dilp8 binding to Lgr3. *Science.* 50:aac6767. doi:  
782 10.1126/science.aac6767.  
783
- 784 Veenstra JA. 2000. Mono- and dibasic proteolytic cleavage sites in insect neuroendocrine peptide  
785 precursors. *Arch Insect Biochem Physiol.* 43:49-63. doi: 10.1002/(SICI)1520-  
786 6327(200002)43:2<49::AID-ARCH1>3.0.CO;2-M.  
787
- 788 Veenstra JA. 2020a. Gonadulins, the fourth type of insulin-related peptides in decapods. *Gen Comp*  
789 *Endocrinol.* 296:113528. doi: 10.1016/j.ygcen.2020.113528.  
790
- 791 Veenstra JA. 2020b. Arthropod IGF, relaxin and gonadulin, putative orthologs of *Drosophila* insulin-  
792 like peptides 6, 7 and 8, likely originated from an ancient gene triplication. 10: e9534. doi:  
793 10.7717/peerj.9534.  
794
- 795 Veenstra JA, Rombauts S, Grbić M. 2012. *In silico* cloning of genes encoding neuropeptides,  
796 neurohormones and their putative G-protein coupled receptors in a spider mite. *Insect Biochem Mol*  
797 *Biol.* 42:277-295. doi: 10.1016/j.ibmb.2011.12.009.  
798
- 799 Veenstra JA, Leyria J, Orchard I, Lange A. 2021. Identification of gonadulin and insulin-like growth  
800 factor from migratory locusts and their importance in reproduction in *Locusta migratoria*. *Front*  
801 *Endocrinol., in press.*  
802

- 803 Warner JF, Lord JW, Schreiter SA, Nesbit KT, Hamdoun A, Lyons DC. 2021. Chromosomal-level  
804 genome assembly of the painted sea urchin *Lytechinus pictus*, a genetically enabled model system for  
805 cell biology and embryonic development. *Genome Biol Evol*:evab061. doi: 10.1093/gbe/evab061.  
806
- 807 Yang CH, Belawat P, Hafen E, Jan LY, Jan YN. 2008. *Drosophila* egg-laying site selection as a system  
808 to study simple decision-making processes. *Science* 319: 1679–1683. doi: 10.1126/science.1151842.  
809
- 810 Yasui N, Nogi T., Takagi J. 2010. Structural basis for specific recognition of reelin by its receptors.  
811 *Structure* 18, 320–331. doi: 10.1016/j.str.2010.01.010.  
812
- 813 Zhang X, Sun L, Yuan J, Sun Y, Gao Y, Zhang L, Li S, Dai H, Hamel JF, Liu C, Yu Y, Liu S, Lin W,  
814 Guo K, Jin S, Xu P, Storey KB, Huan P, Zhang T, Zhou Y, Zhang J, Lin C, Li X, Xing L, Huo D, Sun  
815 M, Wang L, Mercier A, Li F, Yang H, Xiang J. 2017. The sea cucumber genome provides insights into  
816 morphological evolution and visceral regeneration. *PLoS Biol.* 15:e2003790. doi:  
817 10.1371/journal.pbio.2003790.  
818

# Figure 1

## Domains of insulin/IGF-related peptides.

Human insulin and IGF and *Drosophila* dilp7 are aligned and the different domains that are recognized in the precursors of these peptides are indicated. In insulin the domain borders are the convertase cleavage sites that are highlighted in red. The A- and B-domains of insulin correspond to the A- and B-chains of insulina and the C-domain to the connecting peptide. Although IGF consists of a single protein chain due to its strong sequences similarity to insulin the A- and B-domains correspond to homologous regions of those domains in insulin, while the C-domain is the sequence between the A- and B-domains. In insulin there is only a single amino acid residues after the last cysteine residue, but in IGF there is a longer sequence, that has been called the D-domain. The IGF precursor is cleaved by furin in the Golgi apparatus and the sequence that is removed has been called the E-domain. Dilp7 is only known from nucleotide sequences, it is unknown how the precursor is exactly processed. Nevertheless, the presence of putative convertase cleavage sites, highlighted in red, suggests the presence of A-, B- and C-domains quite similar to those in insulin. However, unlike insulin or IGF, the putative B-chain of dilp7 has a long N-terminal extension that I propose to call the F-domain. The latter is well conserved in dilp7 orthologs from other bilaterians (Fig. 4).

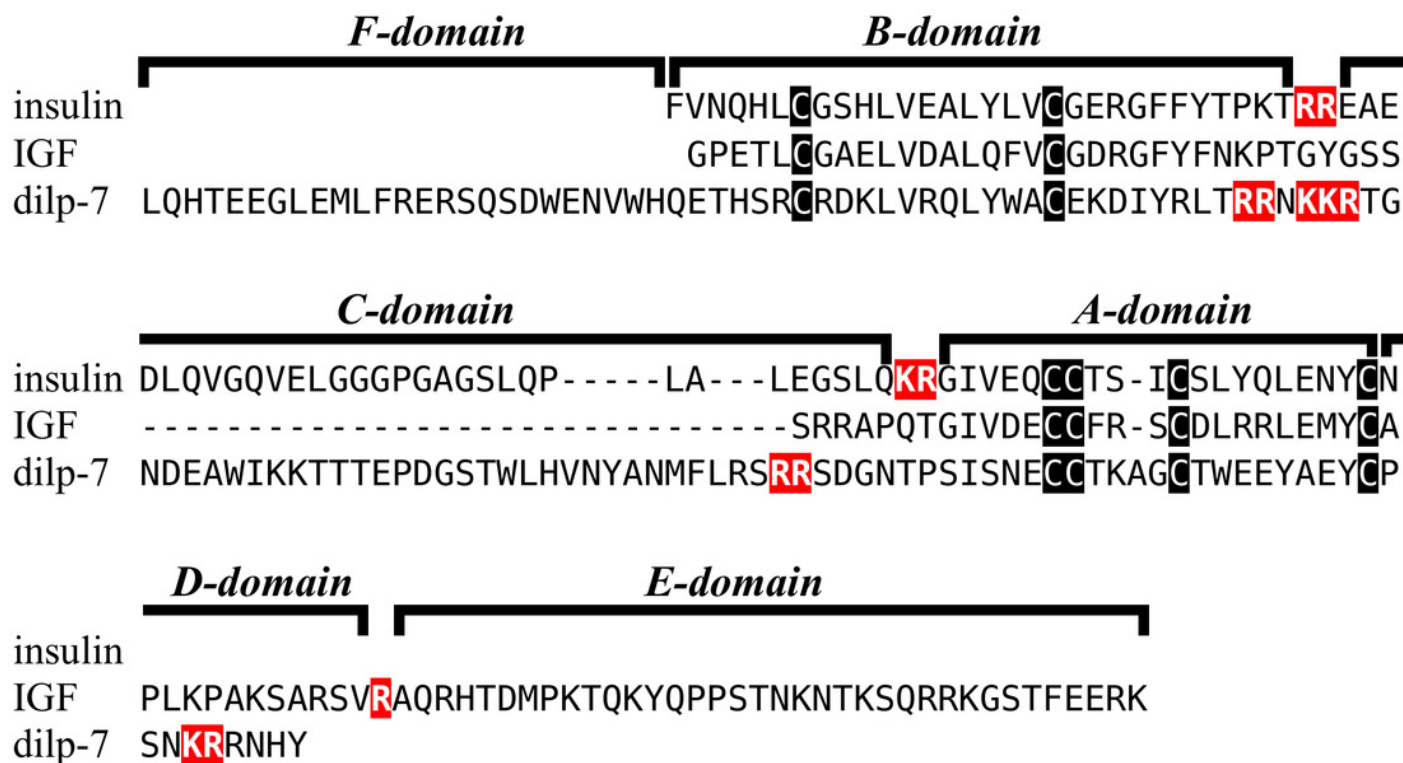

## Figure 2

### Sequences of selected ambulacrarian IGF.

Partial IGF sequences from selected ambulacrarians are illustrated to show their sequence similarity. The A-, B- and C-domains of the insulin core are aligned, but not the putative D- and E- domains, as their amino acid sequence is only conserved in closely related species (Fig. S1). Not aligning D- and E- domains allows the visualization the context of putative convertase cleavage sites. None of the arginine or lysine residues conform to a typical arthropod or vertebrate convertase cleavage site. Although the sequence of the latter part of the IGF precursors is not well conserved, all of them are rich in positively charged amino acid residues. Conserved cysteine residues are indicated in red, conserved amino acid residues are highlighted in black and conserved substitutions in grey. The arginine and lysine residues in the D- and E- domains are highlighted in blue.



Anneissia QPNHVRRYCGSELTSELEERRCALKGGFNSPKKQESP-----  
Strongylocentrotus-1 ---SFPLLCGQELVKAVAANCNDR-GYYGQPS-----  
Strongylocentrotus-2 ---SFRLCGRELADALAVVCKGR-GYYIDDSEI-----  
Apostichopus-1 ---SGQRYCGEALLEAMAYVCGDR-GYFVTSGIRGRS-----  
Apostichopus-2 ---AQRYCGTNLADALRIVCADR-GYYTQ---KGA-----  
Acanthaster-1 ---AVIQVCGNDLLDALKSVCGDR-GFYSPPPGYS-----  
Acanthaster-2 ---WQRICGEQLVETVSVICNTR-GFYSHR-E-----  
Ophiothrix-1 ---WQRLCGTFLVDVVSQVCGER-GTYADDSTHDLRKRSLDNFVDRGKMYSAGISKT  
Ophiothrix-2 ---SYLCGSQIVQMMAVVCEGR-GYYYTEGSTGQICN-----  
Saccoglossus ---WDKLCGRTLVDVLLALICNGR-GYNSGSPKK-----  
Ptychodera ---WDRLCGRSLADMLLALVCHGR-GYYTDVVSROQ-----  
Schizocardium ---WDKLCGRTLADMLSLVCHGR-GYYTDVSKHR-IR-----

Anneissia -----YLWNQEKRIEATS-----TERAKEINIVYECCHSACTEAFIDS  
Strongylocentrotus-1 ---KRSAGIELETRAKTEFLKSGISRGETRRSKRGARTGLIVTECCLNRCVSHLES  
Strongylocentrotus-2 ---AQKDSPIVPHVASSFLGSS-ASAHSRQRRRVRTGOIVNECCDKECSNNIMES  
Apostichopus-1 ---VSRSPFLTEERANSELTNE-----RTRKTRRTGRIVTECCDNP CSQRNLES  
Apostichopus-2 ---PEVIPQRASSELTDS---ENHHPRLRRGTGIVTECC EKA CDREVLET  
Acanthaster-1 ---KREAELEODERTAKSEFLGTHIG-----SRQRRRTGRIATECC EKV CSYDIVES  
Acanthaster-2 SDTNAESNFERGESEAKSEFLGL-----SRQKRRTGRIVHECCNNICNYRIIES  
Ophiothrix-1 IVYSFLTDPELLEERANSELTNE-----RTRTKRRTGRIVTECCDNHCDMQIIIES  
Ophiothrix-2 ---KVKRESPEERSGMEANDEFGNIS-SKEKRQRRRSGSGKIVDECC HQA CDYTTLES  
Saccoglossus ---KSRRARETVEATQEEANGFEGVG---S---GRTKRRRSGSLIVVECCDKICDYSTIES  
Ptychodera ---LPRETIETQEDAHKEFGASV-FG---ERTQRRRSGSLIVAECC EKS CDYATIES  
Schizocardium

Anneissia FCLSSNKDEDTTVESDVTETTITGKKRKPTRKPKNPKSRKKPKGSSEINSEQSASN  
Strongylocentrotus-1 YCNPLPPDAVHDAEVHIRLEKSAEEDADEGRPDQGPSQLDTATGTVPETEMSETRGRV  
Strongylocentrotus-2 YCNRRTPPEVPPESAISENPSEEITESTLRITDGESTEIRITDTNPATNLEVPSPDANTP  
Apostichopus-1 YCNVATTQTTEIPTELTTEGTTTEPAASPRRNSRNIEADGTAAGGGSGQNGRGRGK  
Apostichopus-2 YCNPHVPTTLALASLVTSIMTKSPTPPSSEPSSSSSSSSSSRNEDKFFMTDNALGEDY  
Acanthaster-1 YCNPPSTSQSQTAAAPPRIITTPDERRANEIVVDETGQNTNSQMLRGGNAMGAGSR  
Acanthaster-2 YCNPWVVEDRDDPMLAPVAPGRVRODKSADADLLLRPDIAEISEDKSSLLRQAAEKD  
Ophiothrix-1 YCNPWPTTTTTATTTQSPEPLPNEQEGGYLTDEIQMKHITRGGQEDNSVDLLSEGSDLR  
Ophiothrix-2 YCAPLQEGQVFTSRNLDVFNVEANNVVEEPSVRVPQQVEENKIVEETVYVSOAIVGE  
Saccoglossus YCAPLPEGVVDLKRFLSQSFGNDFKDTANEDKLEIVTVVRPSHDEMDGTETRIED  
Ptychodera YCAPWPKDIDPAKKIEGFKEGTWEEEDYHRYHPESVEQPNANPEEPTPTTTDLDK  
Schizocardium YCAPWPKMDPALRFAGFKYGSWEDEDYRYKYPHEEFTQPDLTTWIASTDSANHDEHF

Anneissia TELPSQTEPTKDKNGRGDKNKKDKCNKKSRLKNNKPCRRKS RKDSRRKNRKNKKNKPK  
Strongylocentrotus-1 RIDAVEKVLSERLIPTSTTGSSPSPSRKKPKRDKSERRNSSREAKQARREERRNRER  
Strongylocentrotus-2 DATATSDVEQPRSDNTTAVEKPRKKDNGKGNSSLESSTKKNRTSKGMSKEDRRRIAS  
Apostichopus-1 KGRHGKGNRRQDQTVDVTS AETEGNTEPPRPNQENEDNRGTPDQSEERPRDRCRG  
Apostichopus-2 EGPTNEGPLTSGEPTPTENRISNGPRGPSSNASSLELPTRTSTATTNSSRIVTEGAHL  
Acanthaster-1 ANGTKAPTEVVDGRSDDDDDAAGEINTSERVGSLEPDEETGRDVATNRPHKTHSKE  
Acanthaster-2 EPIDDLTLENEYADGGNVMQA REGVKEEGAELGKEMEEGGEKMPFPEVPTKRRR  
Ophiothrix-1 DETPMTGRATGGRSPQLGHDQADVDSGFHRFGDIGAEVEESDSTIDNPSSDR---  
Ophiothrix-2 TTSDGFDWSDVSETHNINLGGGDMYINDQPRDDPSENDEEHIPKESLIKQINVTES  
Saccoglossus NEHVTPPTKPDVITETSSLLDDINVNKQIISNNTSVEVKS KAGNTKPKREKKDRDNS  
Ptychodera SLESERDNVDIEESRSKDKSAESESVTENDDLKSEETNDNQDEYSREYLRDKGP  
Schizocardium TTATPSEETTSSENGEHIKTVNKEDDTQVTGTHELEKDHKFAEYWMNEDKMSRKHKKA

Anneissia TRRPKRWDSETTTLSDFLFSQRFQLQRAYDSIDVDEITTEFGVVPPEEDISSSLSEEL  
Strongylocentrotus-1 SSGGRSRNGRRKDKNDNRASRAKRHGLNLWRNMFSDKFFSDIPGLENQPNLHPVNGRA  
Strongylocentrotus-2 DERRASREKKELSERRRKRLKLQQRKDKKKKRLLESABERNRGTDHMGLSEDSTLLAR  
Apostichopus-1 SKKKGKCRNQDRVEEPTQDRIEEPTTSREVSSTDGLSERERGSGGGRNRGNGKCK  
Apostichopus-2 AESSDQSSLEDTDESEAPT KASHERTRKKQKKQRTTRPPKPKKLSREKREKRRKKE  
Acanthaster-1 RSKNRTSKSERRRRTNRRSSSERMLSSERKREDATRKLRRKEQRLSRKQPHSNKR  
Acanthaster-2 VEGRRSRENSRDRNGKSEKSKRKSRSREGGRSFRRRGKNSRRKKGRDGRERSKRWEA  
Ophiothrix-1 QTDEILDEDTDSENSESKLSIGATKNSGRTPKPTRRPTSRHSRRKNSREKKNKTKTR  
Ophiothrix-2 SSKRSHPKPKSRKKQLRIRKARGRKTKLRLHVVKSKSTPIQQIETTTTMMKPF  
Saccoglossus ERKHKKAPT KLFKEKLLSEDNKKKKSRAKSKNSTKVKPTYVSSMTTSD EETLTPQG  
Ptychodera KRLMKERRARKSRTKKGNNTKSKSILGKLVENMETESP TNWQRDGTDERWWTVEDPHF  
Schizocardium



## Figure 3

Sequences of selected echinoderm GSS.

Sequences of selected echinoderm GSS. Sequence alignment of a few echinoderm GSS showing relatively conserved A- and B- domains of the insulin core sequence and likely KR convertase cleavage sites that can be expected to be cleaved by neuroendocrine convertase as well as a few potential furin sites. Conserved cysteine residues are indicated in red, conserved amino acid residues are highlighted in black and conserved substitutions in grey. The arginine and lysine residues that form likely - or possibly in the case of *Apostichopus* GSS-2 - part of a convertase site are highlighted in blue. For the alignment of a larger number of echinoderm GSS sequences see Fig. S3.

```

Strongylocentrotus  --QQGPRNRYCGLEFARAVETQCSMANKRSDPGAVAESASAARYLA
Apostichopus-1      -----IRLCGPDLSRAVYQICSHG-KRGYIPPTFNS--E-----
Apostichopus-2      ----WSHQRLCGPDLVHALSLSVCGERG---YFGGSRLVER---D-V
Acanthaster-1       ------EKFCDNDFHLAVYQTCSTH-KRGDGEPVLSL--K-----
Acanthaster-2       ----DSSSKHCGSAFPQFVWTACSMA-KRS-NRSPRSL--D-----
Ophiothrix-1        --DSARYQPLCGREFTRAVMEICATQVKRTEPLFQRFYNAN-----
Ophiothrix-2        ----QDSYKSCGREFTRRVMEVCATHVKRTEHF-----

Strongylocentrotus  DTGYEQAEDMPLEWYDVARQGAERLRP-----SL---TDIIF
Apostichopus-1     DDQLNQEFGTDL-----EEYLAETIKEYLKPNSLYDDVERELYPSL
Apostichopus-2     DDGLDEEITTLV-----VGAERT-----SILECLK--AWSPF
Acanthaster-1      D--VLTGS-----RLRG-NIKRSFGSTLE--DEAFF
Acanthaster-2      D--LLETF-----KSAR-----HLDIS--Y--RT
Ophiothrix-1       --LVKRSIDPAFWNNLLEANP-----DLMD
Ophiothrix-2       --MVKRSIDDEFWNDLMESGL-----GL--

Strongylocentrotus  SRFRRSIHNRGQLPMGQLCCVYGCTLVELASVCT-----
Apostichopus-1     RG---FRRVTRTGGIARRCCSTGCSSSDIAKLC-----
Apostichopus-2     ----RRRTRGIVEECFRRCTWENLESYCSKTTAYKKADNMI
Acanthaster-1      SR---LVKRSEYDGIASYCCIHGCTPSELAVVC-----
Acanthaster-2      IR---LSKRQDYDGMADYCCIIGCSTNELIASGIC-----
Ophiothrix-1       ----KRQSSAGVGMATHCCQSGCSQEISMVC-----
Ophiothrix-2       ----DKR--SETGMAEHCCQNGCTDQEISMVC-----
    
```





## Figure 5

Sequences of selected ambulacrarian octinsulins.

Sequences of selected ambulacrarian octinsulins. Sequence alignment of a number of octinsulin sequences show that these sequences all have typical neuroendocrine convertase KR cleavage sites, suggesting these precursors are processed by enteroendocrine and/or neuroendocrine cells. Conserved cysteine residues are indicated in red, conserved amino acid residues are highlighted in black and conserved substitutions in grey. Likely convertase cleavage sites have been highlighted in blue. Sequences are from Spreadsheet S1, a comparison of a larger number of sequences is presented in Figs. S7 and S8.

```

Anneissia          -----ARDWYC-----GNAADTLKEFCQS CYASKRAHN--ALSLP
Strongylocentrotus -----QSWHC-----GRAAQTIMGM CNS CYASHDKRS-----
Apostichopus      -----SWYC-----GSAPETVRAICDGCYAGGIHTR--AFKRS
Acanthaster       -----DSWYC-----SDVYSTVQSLCDS CYAGFDKRT-----
Ophiothrix        -----NQWFC-----SPVFTMLQSM CGS CYAGVDKRS-----
Saccoglossus-1    -----MSRNWHC-----GRPVETMHEV CQGCYAGHVRPR-----
Ptychodera-1      -----LRREWHC-----GRTVETMQGICRG CYAQPSERS-----
Schizocardium-1   -----FTKHWHC-----GRIVDTMRAICDGCYASPTARD-----
Saccoglossus-2    RPSGSVD-----DVLTC-----KRKLLLDVQICAG CYAPPDIINNVDLTL
Ptychodera-2      RPRNQGD-----D--VFC-----SRTYSMVESV CDGCYATTQDSSPKSESAM
Schizocardium-2   RPNRPSE-----D--VRC-----RKTIHMLVKKL CNGCLAPIESEVENN--TI
Saccoglossus-3    ---LPVDDTTTGVDVDRDRLWLC-----GRLVEDLRAL CRYAG---P-----
Ptychodera-3      -DLLPGNGDY---SNSAKGRRDLD C-----THLVESMSLICRG CYATDQGV-----
Schizocardium-3   -----QTSADRPKRWHC-----RKSVPEILSGV CRYAEPLQPP-----

```

```

Anneissia          SIKA-----KKGDFELTKEGASGYLEAKRTRL-----FSS-LHLNHRQHETT
Strongylocentrotus ISKPSY---TPAKPELHKRNVAHF LRRTTKREIESRPSMGDTAIEVAVERRSTGNR
Apostichopus      SSDIIS---LYKDPFLKKSNA LNFLLPRSHTP-----S-----SLIKRGIRRS
Acanthaster       NSITRP---I-EEPFVERKNAVDFEKKRTAR-----G-----TRR
Ophiothrix        DNSDTLSQKQSLDAEIQKEVAYSFIKRTSVG-----DT-----FLRNARNTHH
Saccoglossus-1    NTRS---VDGVQAFISRRDANMFTKGMSPD-----V-----KRAIDG
Ptychodera-1      T--N---EAERQAFIGKEEASSETKSV-----TIVKR
Schizocardium-1   V--G---SVKGLPELKKHEASTFTRTRS-----SVQKR
Saccoglossus-2    GK-----GPGY-----EEEIVKN
Ptychodera-2      NE-----SVQI-----QDEDLRE
Schizocardium-2   SN-----ETPP-----DQDVVTA
Saccoglossus-3    -----DISKREASKFMQFNA-----HTIRQSR
Ptychodera-3      -----TVNKRLASSFIPTTTP-----R-----NKIQR
Schizocardium-3   G-----KRDILNKQEA SLFLRSP-----NGGDE

```

```

Anneissia          NFVTECCYNP CSSFEMIKYCCPTRQIE LHNRNPNSSEDK-----
Strongylocentrotus GFIHECCNKF CDPGEMVLYCC EKQIEWAQFHNLLKA-----
Apostichopus      GFIGECCNKF CEIREMVFYCCAEKQREYASEFPEIFRNRIHTR-----
Acanthaster       GIVDECCHRQ CAVSEMMLYCC EQKQREY YTFVGWLKRR-----
Ophiothrix        GLIDECCYQQ CDTGEMILYCC QERQREWHIMGLYN-----
Saccoglossus-1    GLIEECCYSQ CSLTHMITYCCAEVQNEFQVEINILGNTDESSENDGDDGEESSV
Ptychodera-1      GLLLEDCCYRR CNLQKMMTYCCAEERQRELNNEFSLLNQKDNST-----
Schizocardium-1   GIIEHCCNHH CSFTELLIYCCERSEEFYSEFIGLLRMDDEDTDASLEKNGDVEA
Saccoglossus-2    QIKEACCKEY CPLPKIIEFC DERQQEFHQFMSSFASTEE-----
Ptychodera-2      KIRDKCCNRR CTIHKMMQFCCEARRNEFHKFLALMGNTDN-----
Schizocardium-2   KVREVCCDNY CSLDKIIEFCCEDLQOEFROFMSFVSNK-----
Saccoglossus-3    GIIEECCYHT CPTERKIQYCCFEVQAOYRLEFMSAI-----
Ptychodera-3      GIIDECCRNR CSVERKIQYCCDEIQKEFAFFFSLFGS-----
Schizocardium-3   LIINECCLRCTVIEKIHYCCREKQIELYII IQSAPWLVDNQR-----

```

```

Anneissia          -----
Strongylocentrotus -----
Apostichopus      -----
Acanthaster       -----
Ophiothrix        -----
Saccoglossus-1    HED-----
Ptychodera-1      -----
Schizocardium-1   EDNTDLQGD DDDNTQNNEGGSIDVVVERDVGDVLLKTDKSKP
Saccoglossus-2    -----
Ptychodera-2      -----
Schizocardium-2   -----
Saccoglossus-3    -----
Ptychodera-3      -----
Schizocardium-3   -----

```

## Figure 6

Sequence comparison of selected ambulacrarian multinsulins and dilp7 orthologs.

Sequence comparison of selected ambulacrarian multinsulins and dilp7 orthologs. Three different sets of sequences are compared. The top five sequences are dilp7 orthologs, the next five are multinsulins having three disulfide bridges and the last five multinsulins having four disulfide bridges. Note that although the multinsulins and the dilp7 orthologs share some sequences similarity this does not include the F-domain. Like the octinsulins these sequences all have typical neuroendocrine convertase KR cleavage sites, suggesting they are processed by enteroendocrine and/or neuroendocrine cells. Conserved cysteine residues are indicated in red, conserved amino acid residues are highlighted in black and conserved substitutions in grey. Likely convertase cleavage sites have been highlighted in blue. Sequences are from Spreadsheet S1, a comparison of a larger number of sequences is presented in Figs. S9 and S10.



```

Anneissia -----LRDYSDRSHNDWARVWTV
Antedon -----LQDYSDRSHHDWARVWTV
Strongylocentrotus -----EKFCNCMVLPELTMEDYEDRTPPEWRESWNMD
Apostichopus -----TLQELNSRTQPSWEQLWIVE
Acanthaster -----APHLPVEQWNSRSKADWVKLWNT
Ophiothrix -----KITDYSRTKADWQRLWLTE

Amphiura-1 -----D-----WVG-
Ophioderma-1 -----DEIGAMKSQNEEPDEHDS---HIGTTQQPVINQRSGMTMEKR---WRG-
Pisaster-2 -----KLNMKPDEVLSVE-SEHCSAVKEFRQVLADNPGVV---KRS-
Asterias-1 -----ELRS-----QDGLMREVRQALARNGRHF---RAA-
Patiria-1 -----APPANDGIEVLTGGKIE----EDDFEGDDFDVKNKNQYYS---RSG-
Acanthaster-1 -----HPDADAKH-GGNL-----A-

Ophioderma-5 NSLTRDADDAPVAMDDKPTSPPRIDIIKRSRHLRCAQFKDMALE-DHFRR-LVGKER-
Asterias-3 -----ELN-----VASCQQLADQVKS-EGKKR---WDG-
Pisaster-1 -----TELD-----EASCQQLADQVKS-EGKKR---WTG-
Acanthaster-3 -----DKTPS-----TASCALAAQIST-EGKKR---WDG-
Patiria-7 -----DKAPS-----AATCEALAAATVKA-EGKKR---WDG-

Anneissia SM--RQC HENIRE--MVHVS CRNDPRKISS-----KR-SIFIPRNEATGFSLR
Antedon SM--RQC HEDIRE--MVHIS CHNDPRKITS-----KR-SIFIPRNEATGFSLR
Strongylocentrotus TLR-TFVGPQLQR--VGELACINDPRKTIVVKR-----SNSDRDLFLPAKLAKAFLHY
Apostichopus NVPTVDCTVDAVQ--LHIIACSNVDYKDHGSRRRRFSDKRRRSIFLNFSEANFLAK
Acanthaster RHV-NTCNEATLP--VWDVACQNDIRKITK-----RMGREFLNEWTAKNFLAG
Ophiothrix SH--QKC NEDILP--LWKIAC TYDIRKIN -----KRA-PEFVEDSEAKAFLIG

Amphiura-1 -FRT-ICDPPFTPSLYIEDFCGVTV---KR-----E-----YEATDPLGFLKM
Ophioderma-1 -YVY-ICEPQLTR--LKNVICNPASVKRS-----DTAGLEFLTEHOAKRFLMQ
Pisaster-2 -PRNYWNTALISQ--RKTCALCGCT---HH-----TLRDDDFMEEKKDATNMLE
Asterias-1 -EDHIYCGVVLLEQ--NRESVCGV--IPG-----SKRNLFVRKEAASEFLE-
Patiria-1 -PRFRVCGTTTHS--WSSFVCHPSGLI-HH-----KRDNDEFLLSAGEANTFLMS
Acanthaster-1 -YRANYCGATTYE--KVRETCHA-----VR-----GVSNOEFLDSDKASTELEFG

Ophioderma-5 -VFAKYCSPTPQT--VMDNYCQCDVVPRSI-----DDKRAFVDKSSAKSFLNH
Asterias-3 -PSHKFCGETINE--KRYAYCTCGLVPRKR-----EELSEFLNRGKANGFLSA
Pisaster-1 -SWHTFCGETINE--KKYAYCTCGLVPRKR-----ELDSEFLNRGKANGFLSA
Acanthaster-3 -PSHTFCGEDINE--RRNAYCNCQVVPRKR-----ELDSEFLPSGKANAFLSG
Patiria-7 -PAHTFCGETLITE--KANAYCHCQVVPRKR-----EELSEFLTPVKANSEFLSG

Anneissia FL---R-T-RRPSELHEDCCLD SRGCTWEEVAEIA CINNRRRMHRPGSPVGR-----
Antedon FL---R-T-RRPSELHEDCCLD SRGCTWEEVAEIA CINNRRRMHRPGSPVGR-----
Strongylocentrotus RHRKDS-R-RRRVGKDEECCAEAQGRWEEELGEYCTLH-TRAYHQSGEQP-----
Apostichopus TKRTHS-RVRRRTTTFSTECDD--KLCIWEEVGEYCWHSR-VYH-----
Acanthaster S-----K-RRKRGLNEECC HEDLGCVWEEVAEYCVMH-GREKHEDGSPVRGKPGRRR
Ophiothrix P-----R-RHKRGLNEECC HESKGCVWEEI GEYCRMH-SRASHVDGRIDSR-----

Amphiura-1 RGMVKRLNPNWRELMSEECY--ESCTSEEIKELC-----
Ophioderma-1 NKR---IWGW-GGLSEECN--EGCSVEEIDEVC-----
Pisaster-2 RGIKRL-----SLSEECCH--EGCYEEVYEV-----
Asterias-1 R--GVQ-----GLAECCG--EGCTIEEISES-----
Patiria-1 EGVGKR-----GMHEECC--EGCWEEMLH-----
Acanthaster-1 RGIKRL-----GLHHECC--EGCSIEEIIYES-----

Ophioderma-5 RAS-TR-----SLDEECN--EGCNLEEIVELSKTMCSSS-----
Asterias-3 RNVQKR-----SLSEECCH--EGCYWEEIEEV-----
Pisaster-1 RNLQKR-----SLSEECCH--EGCYWEEIEEV-----
Acanthaster-3 RRITKR-----SLSEECCH--EGCYWEEIEEV-----
Patiria-7 RNIAKR-----SLTEECCH--EGCYWEEIEEV-----

```

## Figure 7

### Position of introns in ambulacrarian irp genes

Schematic representation of the location of the cysteine residues, indicated as purple rectangles, and introns, represented by green T's, in the coding sequences of the various types of ambulacrarian insulin-like genes. Numbers indicate the phase of each intron. All genes share the typical phase 1 intron present in insulin-like genes, whereas dilp7 and multinsulin genes also share a phase 2 intron. Signal peptides indicated as interrupted bars.

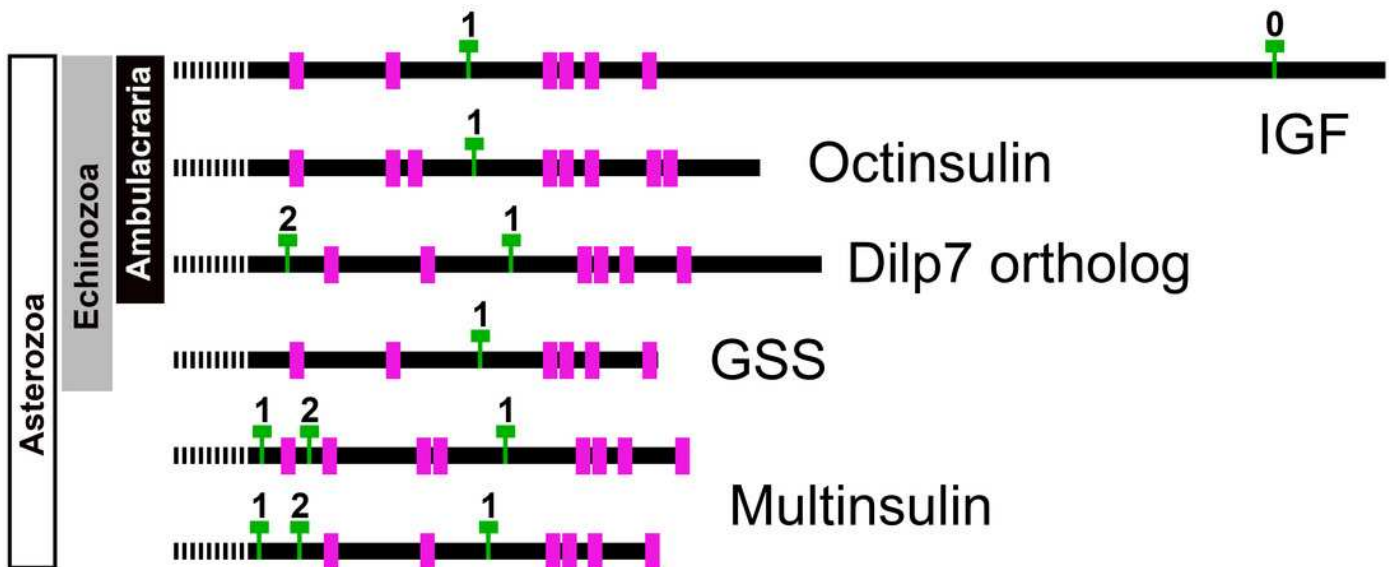

## Figure 8

Synteny of ambulacrarian irp genes.

Schematic representation of the relative localization of different irp genes in several arthropod and ambulacrarian genomes. Arrow heads indicate transcription direction of the various genes, the numbers below the line indicate the number of nucleotides between the coding regions of adjacent genes in kilo base pairs. Note that the relative organization of the two insects - the cockroach *Blattella germanica* and the stick insect *Timema cristinae* - is the same as in the hemichordate *Saccoglossus kowalewskii* and remarkably similar to that of the sea urchin *Strongylocentrotus purpuratus* and the sea cucumber *Holothuria scabra*. In the spider *Pardosa pseudoannulata* and the sea cucumber *Apostichopus japonicus* some of the genes are also next to one another. However, in the sea stars *Acanthaster planci* and *Pisaster ochraceus* synteny has been lost. Arthropod data from Veenstra, 2020b.

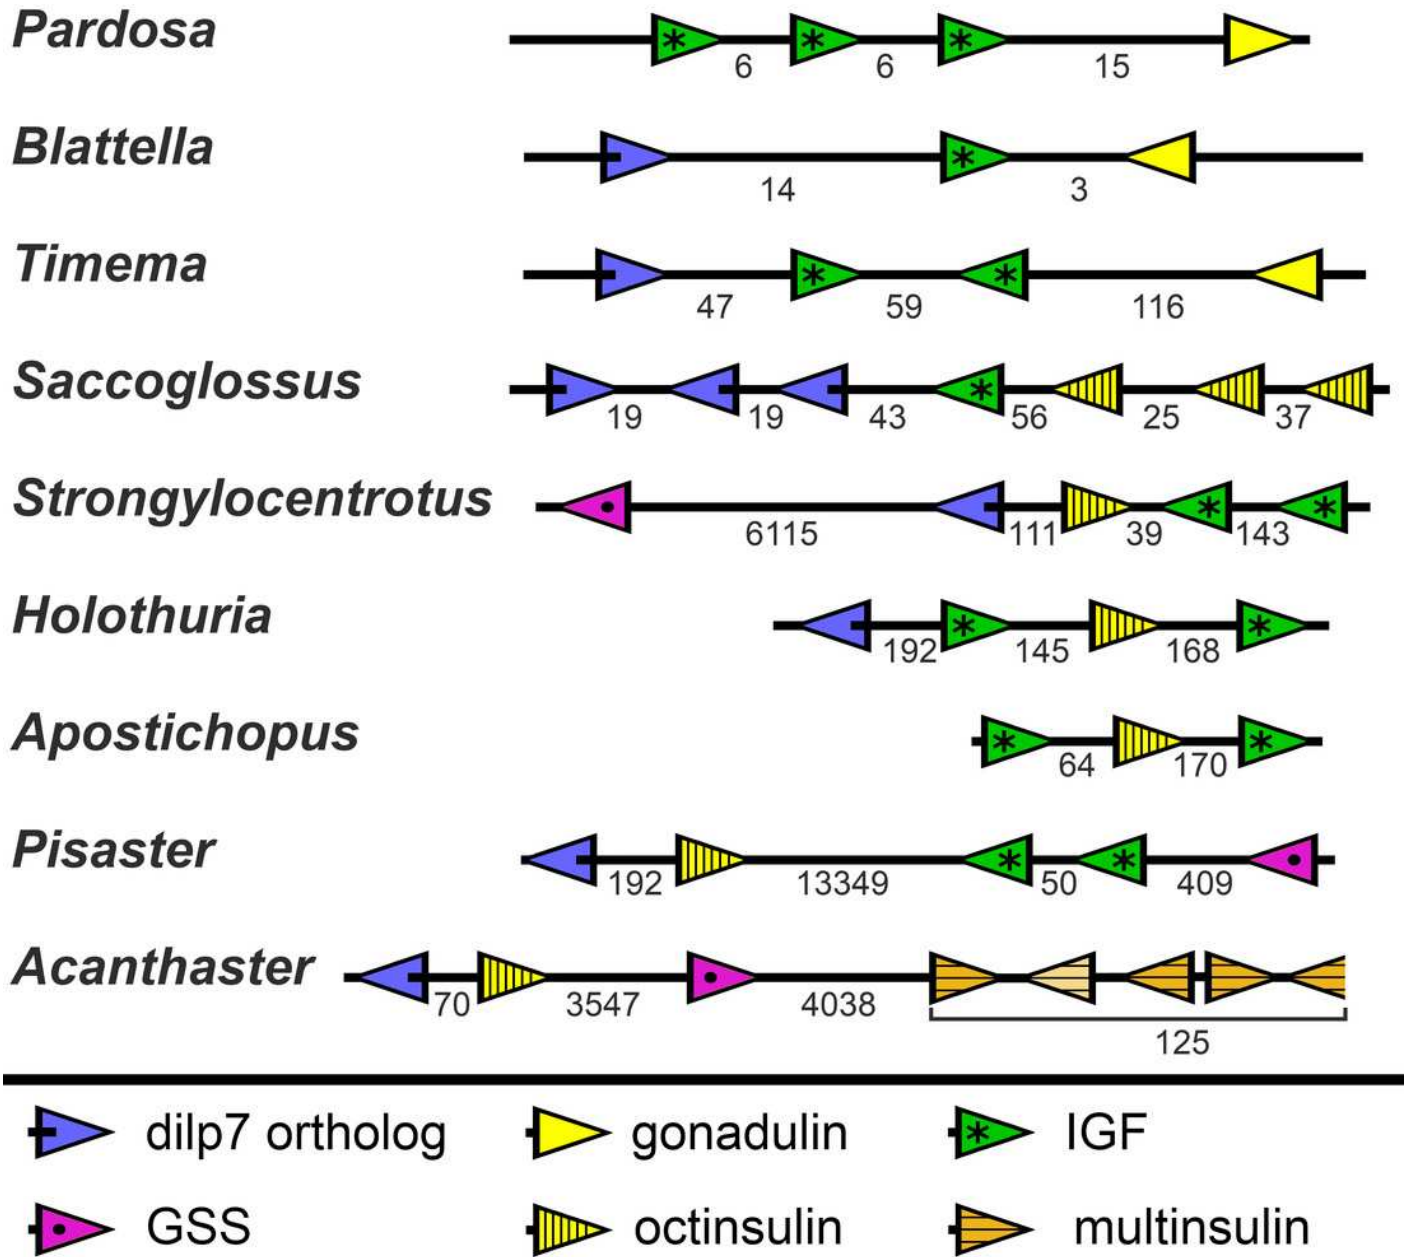



## Figure 9

Radial sequence similarity tree of ambulacrarian irps.

The five different types of irps are clearly separated from one another. Note that the GSSs are similar to IGFs and seem to be related to them, while the multinsulins are most similar to the dilp7 orthologs. Echinoderm branches are in black, hemichordate branches in red. More extensive sequence comparisons and sequence trees are the supplementary data (Figs. S1-S10). All sequences are from Spreadsheet S1.



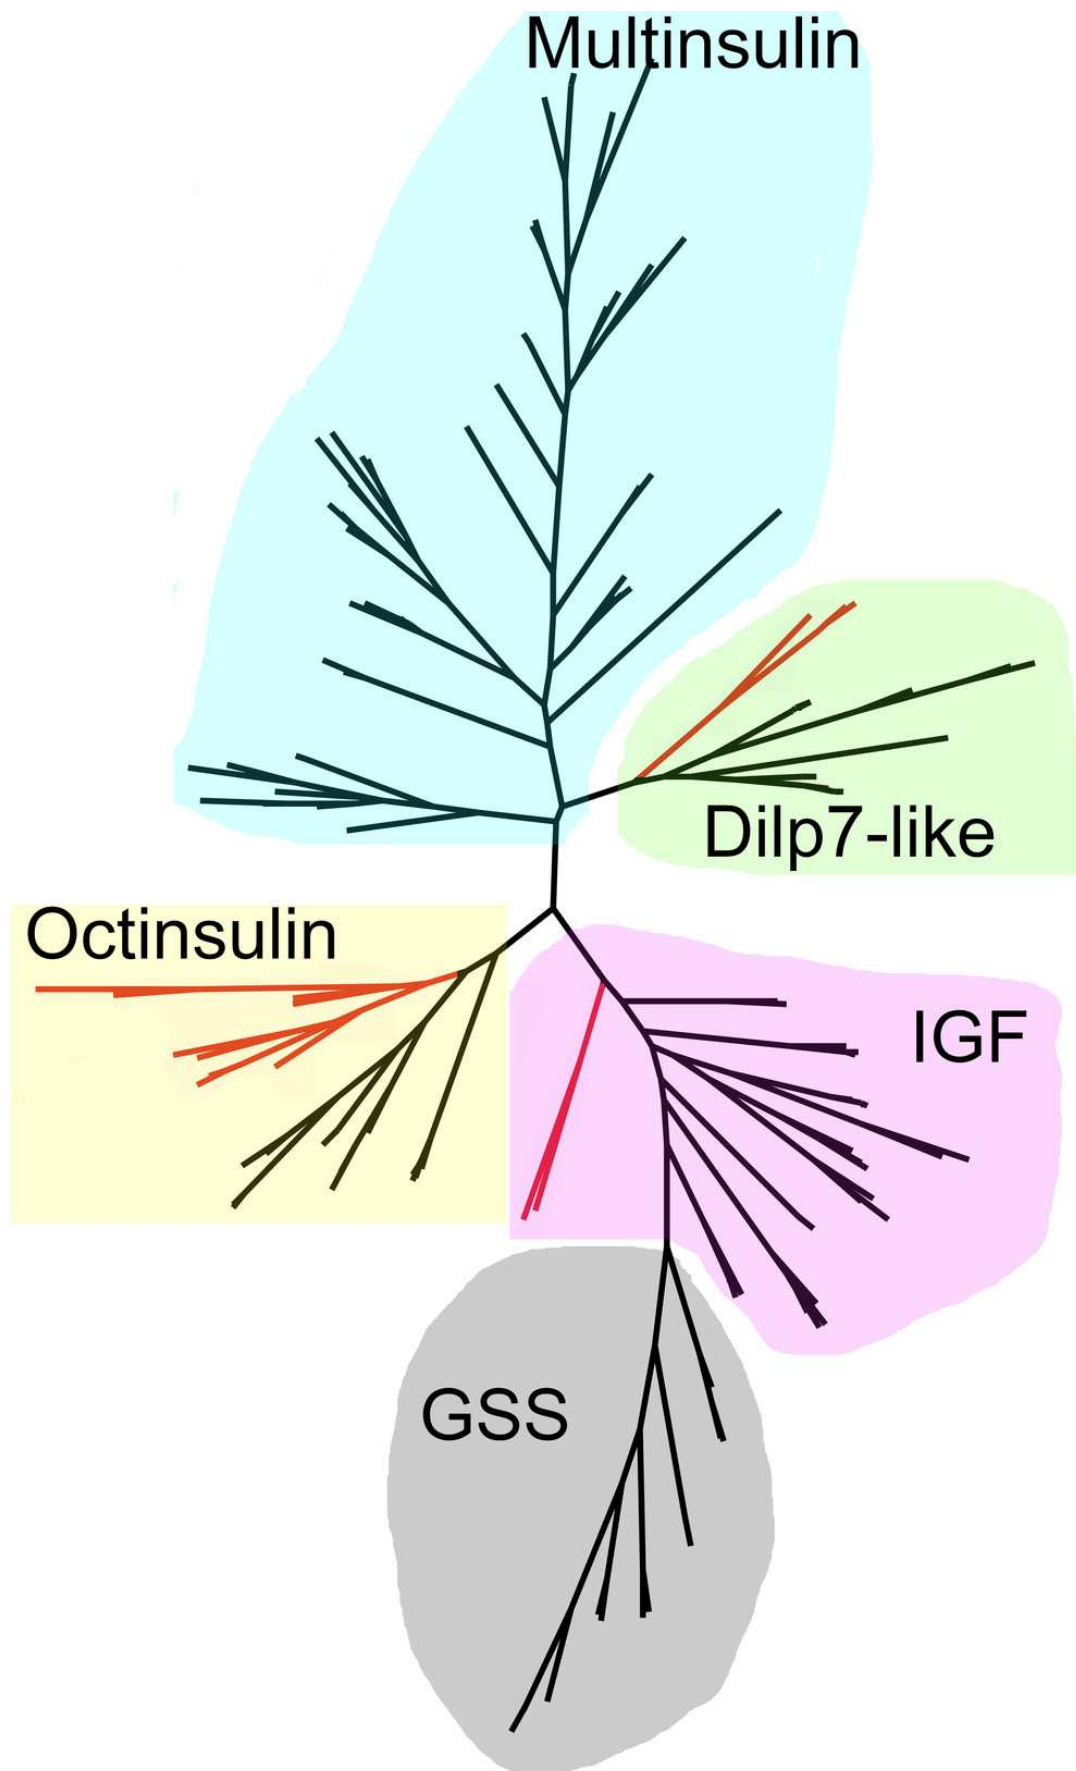

# Figure 10

Phylogenetic tree of LGRs.

Phylogenetic tree constructed from the transmembrane regions of ambulacrarian LGRs that are putative receptors for irps. A few human and insect sequences have been added for comparison. The insert at the top shows the same data to which the glycoprotein LGRs have been added and where characteristic ligands for each branch have been identified. Numbers in blue indicate the apparent probabilities as determined by Fasttree. For details of the glycoprotein LGRs see Fig. S11.

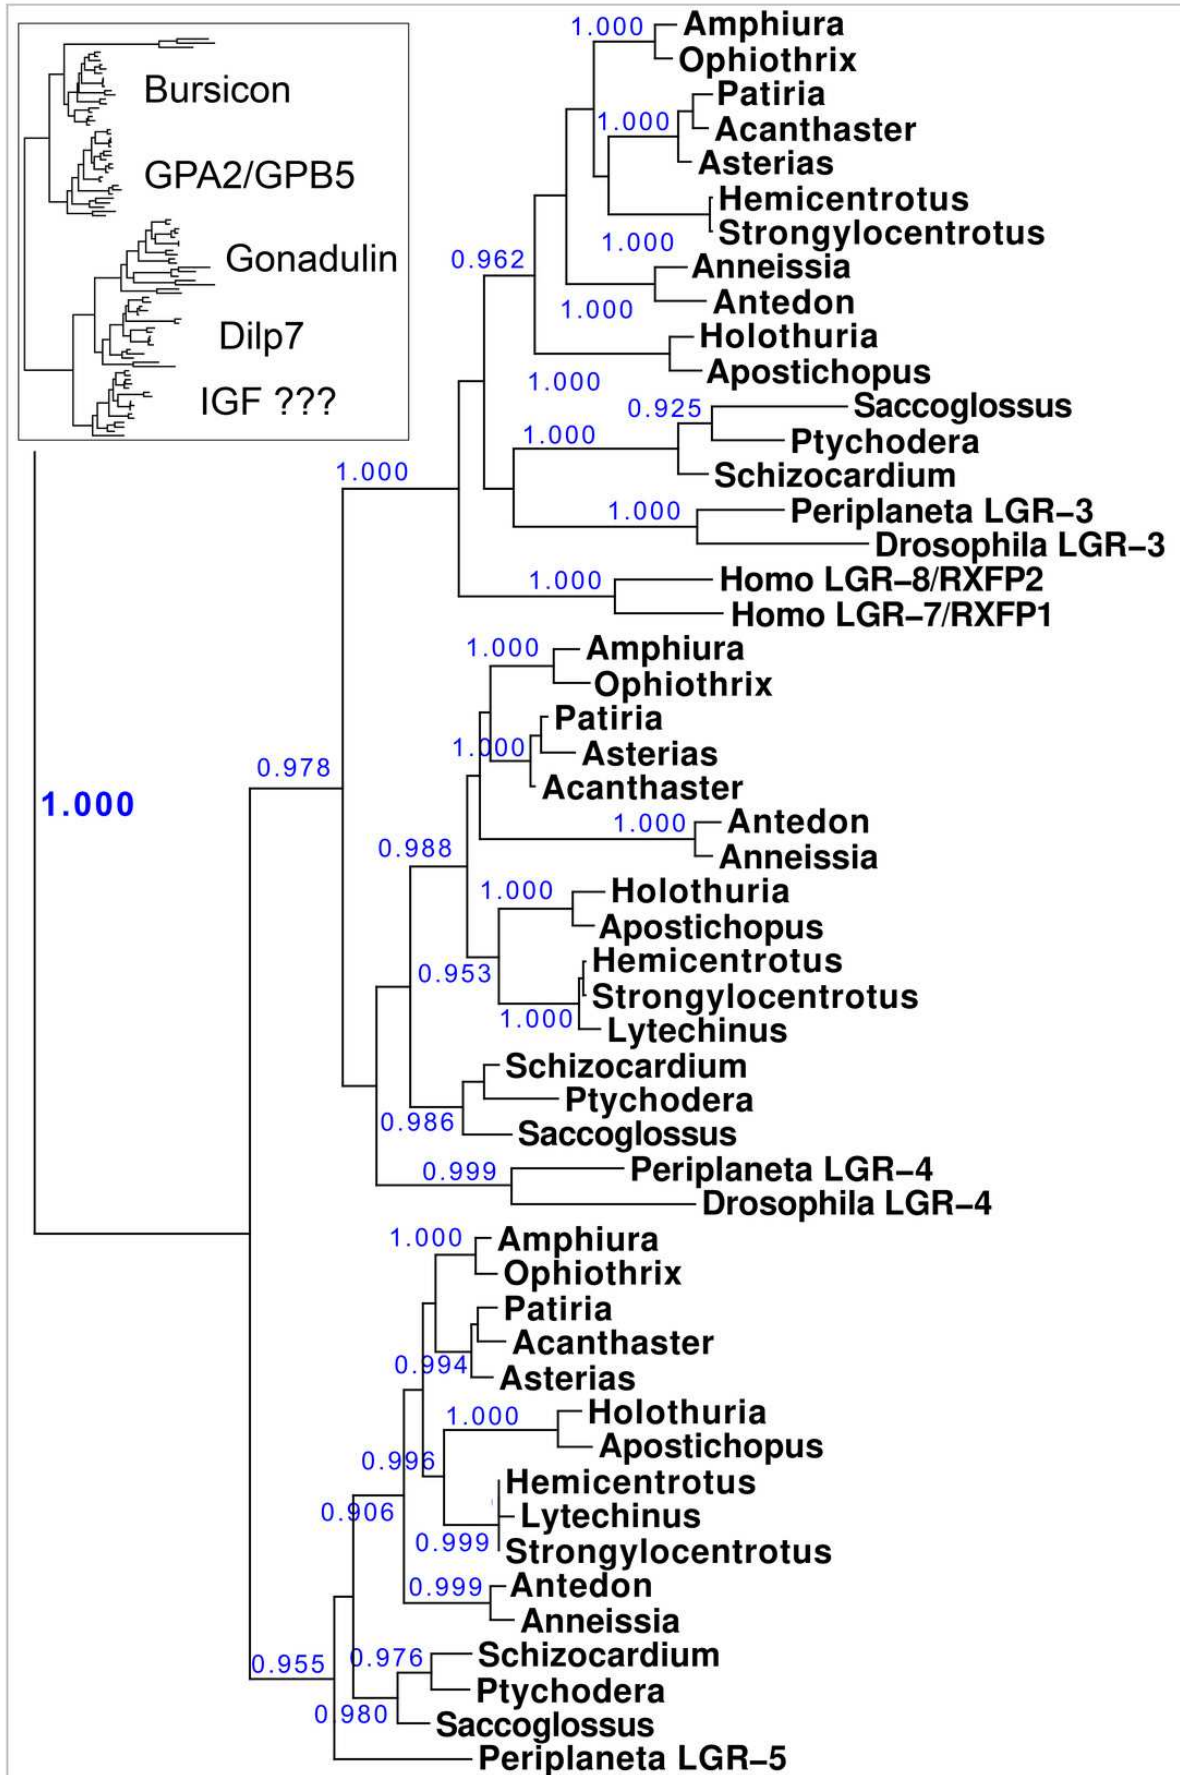

# Figure 11

## Ectodomains of ambulacrarian LGRs.

Ectodomains of ambulacrarian LGRs. Schematic representation of the various domains of the putative receptors for ambulacrarian insulin-related peptides. Each green circle symbolizes an LDLa repeat and each purple rectangle an LRR repeat, while the yellow oval indicates the seven transmembrane regions. The top representation corresponds to the gonadulin and dilp7 receptors (Figs. S11,S12). Note though, that the latter are somewhat variable, notably in the sea stars of two species of the *Patiria* genus and *Acanthaster planci* those receptors have two LDLa repeats (for details see Fig. S12). The bottom representation corresponds to the GRL101 receptors (Fig. S13).

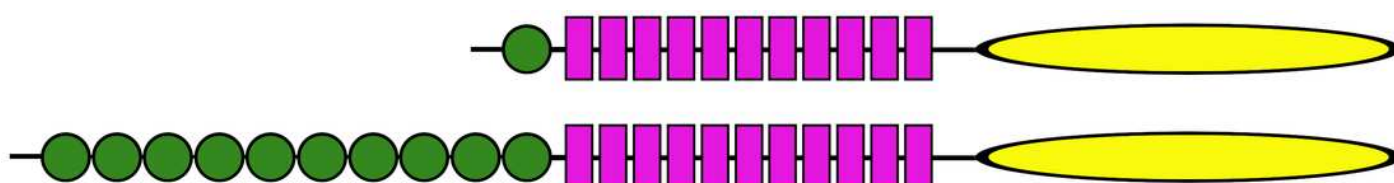

## Figure 12

How echinoderm irps may have evolved.

A represent an early metazoan in which an arch irp is a ligand for both an LGR and an RTK. B represents an early protostome or deuterostome that has three irps, an IGF and a dilp7 ortholog as well as gonadulin/octinsulin ortholog that evolved from local gene duplication from the arch irp. All three of these ligands each each their own LGR and at least two of them, IGF and the dilp7 ortholog, can also activate the RTK. C represents the Asterozoa where the dilp7 gene got duplicated and yielded several multinsulin genes which are represented here as one. The Asterozoa also have one or two GSS's that evolved earlier during echinoderm evolution. Both multinsulins and GSS's act exclusively through the RTK. Closed arrows indicate gene duplication events and interrupted arrows show ligand-receptor interactions. The question mark conveys uncertainty with regard to whether or not the gonadulin/octinsulin peptides are able to activate the RTK.

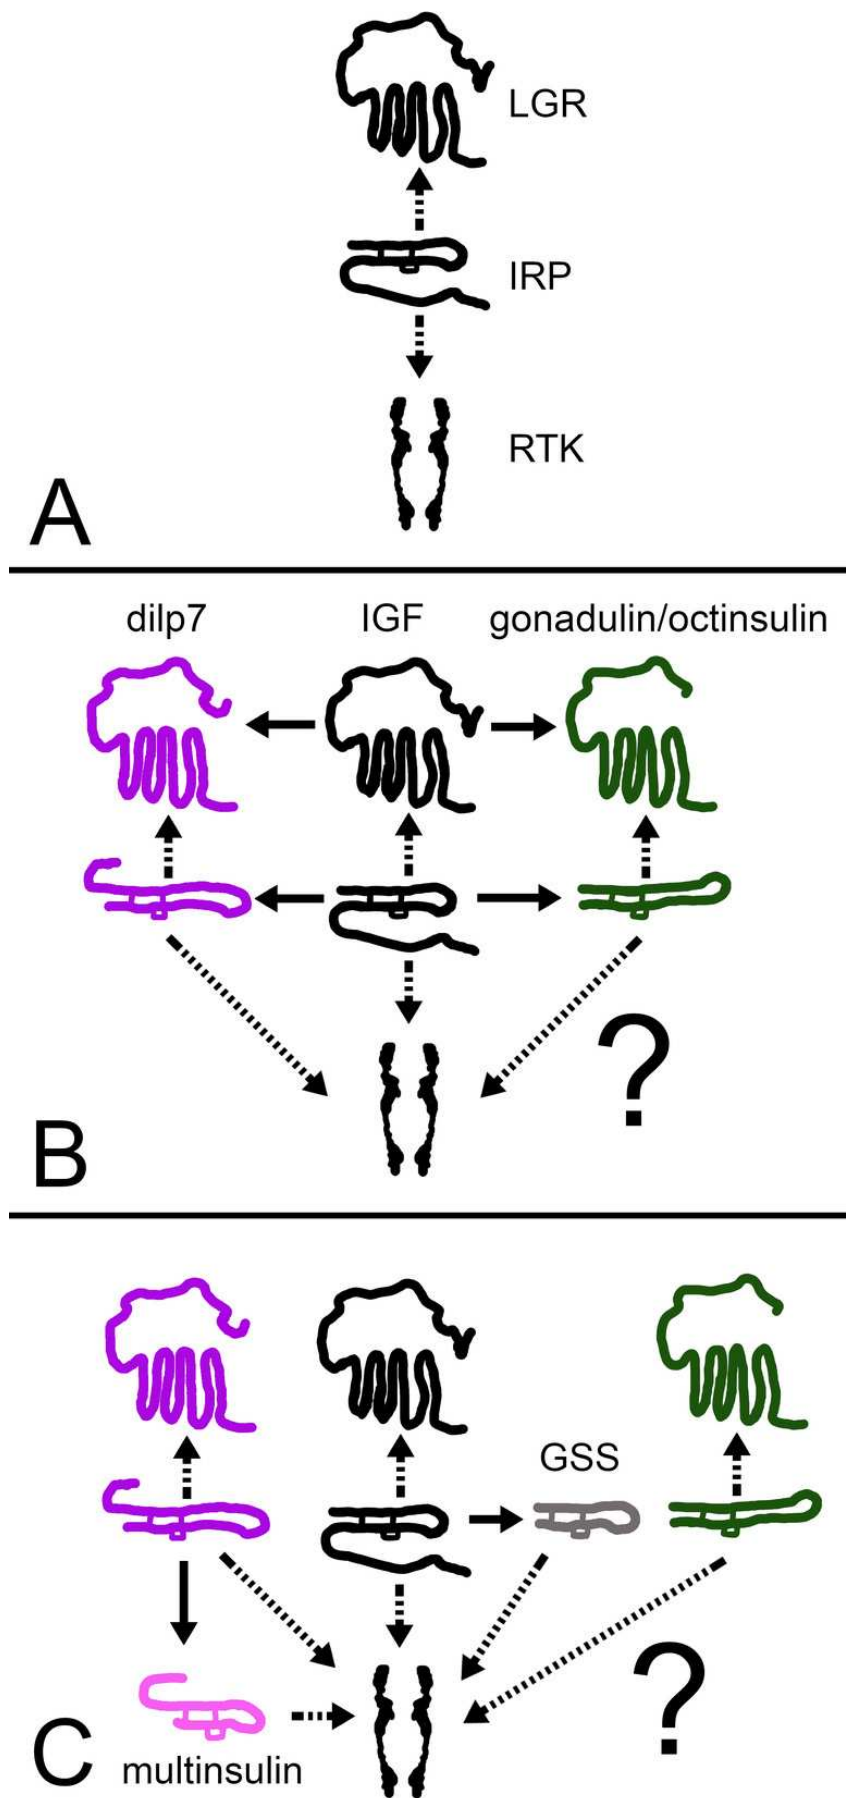

Source: https://www.biorxiv.org/content/10.1101/2021.04.15.440029v2.full.pdf
