# Supplementary material for: Ambulacrarian insulin-related peptides and their putative receptors suggest how insulin and similar peptides may have evolved from Insulin-like Growth Factor
Source: bioRxiv preprint, doi:10.1101/2021.04.15.440029, version 2 (2021-05-25)
Supplement: SequenceData [file 440029_file03.xlsx]

## Sheet: Acanthaster
Acanthaster planci
Name	Genbank identifier	Method	CDS	Protein
IGF-1	XP_022102688.1		ATGAACCAGTTTCGATTGATAGTACTACTGGAGGTGATGGCATACACCGTGCTCCCAAACCAGGCGGCCGTCATCCAGGTGTGTGGCAACGACCTGTTGGACGCGCTCAAGTCCGTCTGTGGTGACCGGGGCTTCTACTCGCCCCCACCGGGTTATTCGCGTCGAACTCCGGCCACGCAGACCGGTATTGCCACACGATGCTGTATTTCGTACTGCGAAACATCCGTACTCGAGAAATACTGCAATCCACCGTCAACGTCCCAGTCACAGACGGCAGCAGCGCCCCCAAGAATCACAACGACCCCAGACGAAAGGAGAGCTAATGAGATCGTCGTGGACGAGACTGGCCAGACGGGGAACACCAACTCACAAATGCTACGTGGAGGAAACGCAATGGGG…	MNQFRLIVLLEVMAYTVLPNQAAVIQVCGNDLLDALKSVCGDRGFYSPPPGYSRRTPATQTGIATRCCISYCETSVLEKYCNPPSTSQSQTAAAPPRITTTPDERRANEIVVDETGQTGNTNSQMLRGGNAMGAGSRANGTKAPPTEVVDGRSDDDDDAAGEINTSERVGSLTEPDEETGRDVATNRPHKTHSKERSKNRTSKSERRRRRTNRRRSSSERRMLSSERKREDATRKLRRKEQRLSRKQPHSNKRKSKLEKKGSESVTTPVAVQTADHPFKHGAYNSTTGDLSLVNVTDSDTAPSSDTKKDGFFTTITAVLRDVIGFQHADDGNR
IGF-2	XP_022102680.1		ATGAGGGCGCTACTCCTCATCGACGTCATTTTCGTCATCATGGCCGCACCAATCAGCGCGTGGCAGAGAATCTGCGGGGAACAGTTGGTTGAGACTGTGTCTATCGTCTGCAACACGCGGGGCTTCTATAGTCACAGGGAGAAGCGAGAAGCCGAGCTTTTTCAGGATGAACGCACCGCGAAAAGTTTCTTGGGAACCCACATCGGCTCCAGGCAGCGTAGGCGGACGGGCCGGATCGCCACGGAGTGCTGCGAGAAAGTCTGCAGCTACGACATCGTGGAGAGTTACTGTAACCCGTGGCCGGTGGTGGAGGATCGGGACGACCCGATGCTGGCCCCCGTGGCCCCCGGCCGGGTCCGGCAGGACAAGTCGGCCGACGCCGACCTGTTGCTCCGGCCG…	MRALLLIDVIFVIMAAPISAWQRICGEQLVETVSIVCNTRGFYSHREKREAELFQDERTAKSFLGTHIGSRQRRRTGRIATECCEKVCSYDIVESYCNPWPVVEDRDDPMLAPVAPGRVRQDKSADADLLLRPDIAEISEDKSSLLRQAAEKDEPIDDLDTLENEYADGGNVMLQAREGVKEEGAELGKEMEEGGEKMPFPEVVPTKKRRRVEGRRSRENSRDRNGKSEGKSKRKSGSREGGRSFRRRGKNSRRKKGRDGRERSKRWEALVTSHPPTKDIVDALRSALRAAGRSPSRVAGSFAPDEQRSPLGTPAGLQHRSGLDPSGKPRPSYRVTQKDNQSTLEALYNLALRLSRPRRG*
Octinsulin	XP_022079235.1		ATGACGCACTCCTTACGGGGCACCCTCCGCCTGCCTTTACCGCAGGCCCGGCAGGTCACCGTCATGTCCCTGGTCGCCCTTGCGTGCTTCGTCTACGTAAGTGCCGATAGCTGGTACTGCTCAGATGTCTACAGCACCGTACAGTCGCTTTGCGACAGCTGTTATGCCGGATTCGACAAGAGAACCAACAGTATAACCAGACCGATAGAAGAGCCCTTTGTGGAACGTAAGAACGCCGTGGATTTCTTCAAGCGCGGGACAGCAAGGGGGACCCGCCGGGGCATAGTCGACGAATGCTGCCATAGGCAATGCGCCGTGAGCGAGATGATGCTATATTGCTGTGAACAGAAACAACGGGAATACTACACATTCGTCGGTTGGCTGAAGCGGAGATAA	MTHSLRGTLRLPLPQARQVTVMSLVALACFVYVSADSWYCSDVYSTVQSLCDSCYAGFDKRTNSITRPIEEPFVERKNAVDFFKRGTARGTRRGIVDECCHRQCAVSEMMLYCCEQKQREYYTFVGWLKRR*
Dilp7 ortholog	XP_022079304.1		ATGGATCGGCTGATGGGGCTTCGCATCAAGGTCTCTACGGCCATTCTACTTCTGCTTCTCCCTTGCCTTAGAGCCGCTGCGCCTCACTTGCCCGTGGAACAGTGGAACTCCAGGAGCAAGGCTGATTGGGTGAAACTCTGGAACACAGAGCGACACGTGAACACATGTAACGAGGCCCTTCTGCCGGTCTGGGACGTAGCCTGCCAGAATGACATACGGAAGATCACCAAAAGAATGGGACGAGAGTTTTTGAACGAGTGGACGGCCAAGAACTTCCTGGCCGGAAGCAAGAGGAGAAAACGCGGTCTGAACGAGGAATGTTGCCACGAAGACTTAGGGTGCGTGTGGGAGGAGGTGGCAGAATACTGCGTCATGCACGGTCGAGAGAAGCATGAAGAC…	MDRLMGLRIKVSTAILLLLLPCLRAAAPHLPVEQWNSRSKADWVKLWNTERHVNTCNEALLPVWDVACQNDIRKITKRMGREFLNEWTAKNFLAGSKRRKRGLNEECCHEDLGCVWEEVAEYCVMHGREKHEDGSPVRGKPGRRR*
GSS-1	XP_022109020.1		ATGGCCAACAACCTCCGTCGTCGTTTCCAAGCAACATGCCTGGTTCTCCTCATATTACAAGCAACCATCAACACGGGAGCCGTCGGTGAAAAGTTCTGCGACAACGACTTCCACTTGGCCGTCTATCAGACCTGTTCAACCCACAAGCGGGGTGATGGTGAGCCGGTGCTTAGCCTGAAAGACGTATTGACAGGGAGCCGCTTGCGAGGTAATATCAAACGGAGCTTCGGATCTACATTGGAGGACGAAGCCTTTTTCGCGAGCAGACTGGTGAAGAGGTCTGAATACGACGGCATTGCCTCTTATTGTTGCATACACGGATGTACACCGAGCGAGTTGGCTGTCGTCTGCTAA	MANNLRRRFQATCLVLLILQATINTGAVGEKFCDNDFHLAVYQTCSTHKRGDGEPVLSLKDVLTGSRLRGNIKRSFGSTLEDEAFFASRLVKRSEYDGIASYCCIHGCTPSELAVVC*
GSS-2	NEW	Artemis	ATGACATCCAAGTACCGCCTAATCCTCGCCTCGGTACCTGCCGTTGTTTTCGTAATCGCCACTCTGAGTTTGTCGATGGTACAAGCCGATTCGAGCAGTAAGCACTGCGGGTCAGCTTTCCCCCAGTTTGTATGGACGGCTTGCTCAATGGCTAAGAGATCCAACAGATCCCCACGCTCGCTGGATGACTTGCTGGAAACGTTTAAATCAGCTAGACACCTCGATATCAGTTACAGGACACCCATCCGTCTGAGCAAGCGCCAGGATTACGATGGAATGGCCGATTACTGTTGTATCATTGGATGCTCCACCAATGAACTTATCGCCTCAGGAATTTGCTAA	MTSKYRLILASVPAVVFVIATLSLSMVQADSSSKHCGSAFPQFVWTACSMAKRSNRSPRSLDDLLETFKSARHLDISYRTPIRLSKRQDYDGMADYCCIIGCSTNELIASGIC
Multinsulin-1	XP_022112156.1		ATGAATCGATTCATCGTTTTGCTGCTGCTTTGCGCCATTGCAGTACAACAAATCAATGGCCACCCGGACGCAGATGCTAAACATGGAGGGAATTTGGCTTACCGTGCCAATTATTGCGGTGCGACTCTTTACGAGAAAGTACGTGAGACTTGCCATGCCGTCCGTGGAGTCTCCAACCAAGAGTTTCTGGATTCAAAGGACGCCAGCACATTCTTGTTCGGACGTGGTATCGAAAAGCGAGGTTTGCATCATGAATGCTGCACTGAAGGATGCAGCATCGAGGAGATTTATGAATCCTGCTAA	MNRFIVLLLLCAIAVQQINGHPDADAKHGGNLAYRANYCGATLYEKVRETCHAVRGVSNQEFLDSKDASTFLFGRGIEKRGLHHECCTEGCSIEEIYESC*
Multinsulin-2	XP_022112231.1		ATGAATCGATTCATCGTTTCGCTGCTGCTTTGCGCCATTGCAGTACGACAAATCAATGGCCTCCTGGACCTGCATGCTAAAGAGGGAAGGATATTGGTTCGCTATCCCCACTACTGCAATGGAATTCTTCAAATAAAATACAATCAGCTGTGCCATCCTCAACCCGAAGTCTTCGACCAAGATTTTCTGGATTCAAAGGAAGCCAACACATTCTTGTTCAAACAAAGAATCGGAAAGAGAAGCCTTATCGAAGAATGCTGCTTTGAGGGATGCACCAACGAGGAAATTTATGAAGTCTGCTAA	MNRFIVSLLLCAIAVRQINGLLDLHAKEGRILVRYPHYCNGILQIKYNQLCHPQPEVFDQDFLDSKEANTFLFKQRIGKRSLIEECCFEGCTNEEIYEVC-
Multinsulin-3	XP_022084271.1		ATGACTCGCTGGATCGTGGCCCTCGTCCTCTGTGCCTGTGTGGCGGTCACCCTGGCAGACAAAACTCCTTCGACAGCTTCCTGTGAGGCTCTCGCAGCTCAAATCAGCACCGAAGGGAAGAAGCGTTGGGATGGGCCTTCCCACACATTTTGTGGAGAGGATCTAAATGAGAGAAGAAATGCTTACTGTAACTGTCAGGTTGTGCCAAGGAAGAGGGAACTTGATCTGTCGGAGTTCCTGCCTTCCGGGAAAGCCAACGCCTTCCTCTCTGGCCGCCGCATCACCAAGCGCAGCTTGTCAGAGGAATGCTGCCACGAGGGTTGCTACTGGGAGGAGATTGAAGAGGTCTGCTAA	MTRWIVALVLCACVAVTLADKTPSTASCEALAAQISTEGKKRWDGPSHTFCGEDLNERRNAYCNCQVVPRKRELDLSEFLPSGKANAFLSGRRITKRSLSEECCHEGCYWEEIEEVC
Multinsulin-4	XP_022084245.1		ATGACTCGCTGGATCGTGACACTACTGCTCGGGGTCTGCGTGACAGTTGTCCTCGCTAGCGATACAGGTGCAGATGACGATAAAGTCCACATTGACGATGCAACCTGTCAGGCCCTTGCGAATCAAGTGAAGGCCGAAAGAGGAAGACGATGGCCTTGGTCTAGAACGGGACCCAAACATTATTTCTGTCAGCCGACTCTGGAGAAGAAAAAAGAGGCTTATTGCAACTGTAAAGTTGTACCGAGGAAGCGAGACGATGGCGACCAATCAGAGTTTCTCAAGCCTGAGAAGGCCGGCAGTTTCCTCGAATCCTCCATCGGGAAGCGAGACTTCAATCACGAGTGCTGCAAAGAGGGATGCTACTGGGAAGAGGTTGAGGAGCAGTGTCATTAG	MTRWIVTLLLGVCVTVVLASDTGADDDKVHIDDATCQALANQVKAERGRRWPWSRTGPKHYFCQPTLEKKKEAYCNCKVVPRKRDDGDQSEFLKPEKAGSFLESSIGKRDFNHECCKEGCYWEEVEEQCH
Multinsulin-5	XP_022084278.1		ATGAATCGTCTGCTGATTTTCGCTGTTCTTGCGCTCACCGCGGTGTACCAGGTGTCTGGTGTGCCACGCAAGCCTGAAGAGCCATCCATCAGCGCACACTGTGGTATGCTTCTGGAACTAAGACAAGTAATGTTGGATAACCCGGGACTGGACAAGAGATCTCCCAGAAATTACTGGTGTGGCACCACCCTTAACAACAGGAAGAGCGCCCTCTGCAGCTGCAACCACCACTCACTCCTCAGCGATGAGCTCATTGAGTCTAAGGAGGCCAACAGCTTCCTGAAGCGAGGCATCGAGAAGAGGAGCCTGACTGAGGAGTGTTGTCACGAAGGATGCTACTACGAAGAGGTGTACGAGCTCTGCTAA	MNRLLIFAVLALTAVYQVSGVPRKPEEPSISAHCGMLLELRQVMLDNPGLDKRSPRNYWCGTTLNNRKSALCSCNHHSLLSDELIESKEANSFLKRGIEKRSLTEECCHEGCYYEEVYELC
Multinsulin-6	XP_022085225.1		ATGAATCGCTTCATCCTACTGCTCTTACTCGGGGCTTTTGTCGCAGCAATCTTTGGAGACGATCCCAAGCCGTCGGAATCTGCGGCGATCGCAGAGGACGACAGCAACAAAGATGGCGACATCGAAGCCAAGGGCGACTTCTCCGTAGCCTGGTCTGGACCTCAAATGTGGGTGTGTCGTGGACGACTTAGGAGGAGGAGGAGATATGCCTGCCATCCTCCTGGAAGACACCATTATAAAAAAAGAAATGATGTACAGGAAGAAAGCAACCCAGAGTTCCTAGATGAGGCCGAAGCCAACTTTTTCCTGAGGCGGCATAAGCGCAACCACATCTCCGAGGAATGTTGCCATGAGGGATGTTACTGGGAGGAGATTTTGGAGTATTGCTAG	MNRFILLLLLGAFVAAIFGDDPKPSESAAIAEDDSNKDGDIEAKGDFSVAWSGPQMWVCRGRLRRRRRYACHPPGRHHYKKRNDVQEESNPEFLDEAEANFFLRRHKRNHISEECCHEGCYWEEILEYC
Multinsulin-7	XP_022085226.1		ATGAATCGCTTCATCCTACTGCTCTTACTCGGGGCTTTTGTCGCAGCAATCTTTGGAGACGGTCCCAAGCTGTCAGAATCTACGGCGATAGATAGCGACATCGAAGCCAAGGGCGACTTTTCCGTAGCCGATAATGGACCTAAATTGTGGGTGTGCCAGGGAAATGTAACGAACACTTTGAAAAACGTCTGCACTCATACTGGAAGACCACATTCAGACACAAGAGATGATGTACAAGAAGAAAACAATCCAGAGTTCCTAGATGAGGCCGATGCCAACTTTTTCCTGAGGCAGCAAAATTCCAAGCAGATCTCCGAGGAATGTTGCCATGAGGGATGTTACTGGGAGGAGGTTTTGGAGTATTGCTAG	MNRFILLLLLGAFVAAIFGDGPKLSESTAIDSDIEAKGDFSVADNGPKLWVCQGNVTNTLKNVCTHTGRPHSDTRDDVQEENNPEFLDEADANFFLRQQNSKQISEECCHEGCYWEEVLEYC
Multinsulin-8	XP_022108165.1		ATGAATCGATTCATCGTTTTGCTGCTGCTCTGCGCCATTGCAGTTCAACAAATCAGTGGTCATTCAGGCGCGGACACCAAAGAGGGAGGGAGAGTGGTTCGCTATCCGCACTACTGTGGCGCGACTCTTCAAGAAAAATACCGTGAGATTTGCCATGCATTACGTGGAGTCTCCAACCAAGAGTTTCTGGATTCAAAGGACGCCAACACATTCTTGTTCGGACGTGGTATCGGGAAGCGAAATCTTAACGAGGAATGCTGCAGTGAGGGTTGCGATGACGAGGAAATTTATGAAACCTGCTAA	MNRFIVLLLLCAIAVQQISGHSGADTKEGGRVVRYPHYCGATLQEKYREICHALRGVSNQEFLDSKDANTFLFGRGIGKRNLNEECCSEGCDDEEIYET
Multinsulin-9	XP_022108166.1		ATGAATCGATTCATCGTTTTGCTGCTGCTTTGCGCCATTGCAGTTCAACAAATCAGTGGCCATCCAGGCGCGGACACCAAAGAGGGAGGGAGAGTGGCTCGCTATCCGCACTACTGTGGCGCGTCTCTTCAAGAAAAATACCGTGAGATTTGCCATGCGTTCCGTGGAGTCTCCAACCAAGAGTTTCTGGATTCAAAGGACGCCAACACATTCTTATTCGGACGTGGTATCGGGAAGCGAAACCTCAACGAGGAATGCTGCGGTGAGGGTTGCGATGACGAGGAAATTTATGAAATCTGCTAA	MNRFIVLLLLCAIAVQQISGHPGADTKEGGRVARYPHYCGASLQEKYREICHAFRGVSNQEFLDSKDANTFLFGRGIGKRNLNEECCGEGCDDEEIYEIC
Insulin RTK isoform X1	XP_022110929.1		ATGTTGGGCGTGGTCTCAAGAGCTGTGCCGGCATGCTGCACGCTTGCCGCAATGCTGCTGGTGCTTTCGACCGTGAACTGCTCAAAGGGTGCTGAAGAGATTTGCGGCAGCATGGACATCCGCAACAAGGTGGACAACTTCAAGGAGCTGGAGAACTGCAGCGTCATTGAGGGCGACCTGCACATCCTCCTGATTGAGGAGGCGTCGCCGGGGGACTACGACCACCTCTCCTTCCCCAAACTGCGGGAGATCACAGGCTTCTTTGTGCTGTACCGCGTTTCCCACCTCCTGACCCTGCGCCACCTGTTCCCCAACCTGGCCGTCATCCGGGGCGACACGCTCTTCTACAACTACGCCCTGGTGGTCTATGAGATGCTGGAGATGCAGGAGATCGGACTG…	MLGVVSRAVPACCTLAAMLLVLSTVNCSKGAEEICGSMDIRNKVDNFKELENCSVIEGDLHILLIEEASPGDYDHLSFPKLREITGFFVLYRVSHLLTLRHLFPNLAVIRGDTLFYNYALVVYEMLEMQEIGLTGLVTILRGAIRLEKNPNLCYMDTIDWSLILREGTDNNFIVDNKDQGGCLNFCPKSGGRNTCRMPTALGTVRELCWSSEHCQKVCPPTCLSACNGMRCCHDSCVGGCSGPTNRDCIACRKLAYNGECINTCPAYTYEYKTHRCIHAAQCPQHWKLHNGQCIEECPTSFITNITNARYCQPCDGPCPKVCEGRMVVNSVGDAANLAGCTIINGSLEIGIRSGTNIMKELEKNLGMIEEVTEKIVIRMAHSLVSLNFLKHLKRIGGTV…
Insulin RTK isoform X2	XP_022110931.1		ATGTTGGGCGTGGTCTCAAGAGCTGTGCCGGCATGCTGCACGCTTGCCGCAATGCTGCTGGTGCTTTCGACCGTGAACTGCTCAAAGGGTGCTGAAGAGATTTGCGGCAGCATGGACATCCGCAACAAGGTGGACAACTTCAAGGAGCTGGAGAACTGCAGCGTCATTGAGGGCGACCTGCACATCCTCCTGATTGAGGAGGCGTCGCCGGGGGACTACGACCACCTCTCCTTCCCCAAACTGCGGGAGATCACAGGCTTCTTTGTGCTGTACCGCGTTTCCCACCTCCTGACCCTGCGCCACCTGTTCCCCAACCTGGCCGTCATCCGGGGCGACACGCTCTTCTACAACTACGCCCTGGTGGTCTATGAGATGCTGGAGATGCAGGAGATCGGACTG…	MLGVVSRAVPACCTLAAMLLVLSTVNCSKGAEEICGSMDIRNKVDNFKELENCSVIEGDLHILLIEEASPGDYDHLSFPKLREITGFFVLYRVSHLLTLRHLFPNLAVIRGDTLFYNYALVVYEMLEMQEIGLTGLVTILRGAIRLEKNPNLCYMDTIDWSLILREGTDNNFIVDNKDQGGCLNFCPKSGGRNTCRMPTALGTVRELCWSSEHCQKVCPPTCLSACNGMRCCHDSCVGGCSGPTNRDCIACRKLAYNGECINTCPAYTYEYKTHRCIHAAQCPQHWKLHNGQCIEECPTSFITNITNARYCQPCDGPCPKVCEGRMVVNSVGDAANLAGCTIINGSLEIGIRSGTNIMKELEKNLGMIEEVTEKIVIRMAHSLVSLNFLKHLKRIGGTV…
GonadulinR-like	XP_022084824.1		ATGGAGACGTCGGAAAAGGTTCAGGATGGACAAAAGTTAGAAATGGCACCAGGGAAAGAGAGTGCCCCCAAACCTCGCTTCCTGGGGATCTCCAGAACTTCTCGGGACTCCAAATGTTCACAGCAGGACCGATTCAGAGACCCTGTTTGGAGTGTCCCGTCGATAACACGACGCTTGCAGACTAAGCAGTGCAAGGCGATTATCCTCTGCATCGTCATGGGGCTCGTGCTGCTCCTTGCCCTGGTATTCATCCTTGTCACCGTTACAGCCAATCAAGTGCCATTGGCAGATCACGAGGGCAGCATTCAAGCGGGACCAGCCCAAACAGAATATGAAGAACTGAGCGGGGATCCGTCGGAGTTTACCTGTCCGAGGGGAGAGTTCCAATGTGGAAACATG…	METSEKVQDGQKLEMAPGKESAPKPRFLGISRTSRDSKCSQQDRFRDPVWSVPSITRRLQTKQCKAIILCIVMGLVLLLALVFILVTVTANQVPLADHEGSIQAGPAQTEYEELSGDPSEFTCPRGEFQCGNMTRCVAQKFQCNGEDDCGNNADETECEHDEGWIKNFDKQVPVSVQPERRISQECGLYGFPEVCKCYETTNLRCLQGNLTEVPQDVSNNLTHLNLNGNMLKNLEDGAFGRYTKLRYLNLMGNGIRELPRDVFRGLMDLDKLFLSSNKISSLKPGTFRFLRNLTWLFLNDNEIEVLDEEVFQGLETVYWLMLQENRIRNLKRGISFRDLPALMWLDISDSPLNHLSPDNFSLSGNPPLSILTMNNCNISTIHGDTLQQFRDLSTLHLSE…
Dilp7R-like	XP_022100793.1		ATGCGGAAACTGCACAACGCTCTTCGGATGCTCTTCGTACTTCACTTATGCGCTAGTAGAAGAGCAGAGCAAGATGGTGCAATAATAAGGCATATCCAGCGTAGAGCTGTGGATGCTCATAAGCACTGTGGAAAAGATTTCCCGTGTCTGAACTCAACACAGTGCGTTCCTCAGGACTCGATATGCGACGGGACGCCTGACTGTGACAACGGCTCAGACGAGTGGGAGGTGGAGGAATGTCGAGACTGGAATTTAGCAAAGATGTGGGATAATTTCTTTGGGACAAAGAATGATGACTCTGGTGAAGAGGAAGAGGATGACTTAGATCAAGGATTACGCCCACAACAAACTGTGTTCGATGCACATGGACACTGCGGAGAGGAGTTTCCATGTATGAAC…	MRKLHNALRMLFVLHLCASRRAEQDGAIIRHIQRRAVDAHKHCGKDFPCLNSTQCVPQDSICDGTPDCDNGSDEWEVEECRDWNLAKMWDNFFGTKNDDSGEEEEDDLDQGLRPQQTVFDAHGHCGEEFPCMNSTQCVPREAICNGKPDCDNGSDEEEIVCRNKKMRDNIEDIRQEIPCEEGTFPESCDCFVEIEQTRTAELPSLASPYNTTGDASTYRDAYDIDSNSTDGVRYGSEVRGVVIGIRLDCRAKQLTNVPRNLPNNTISLDLSDNKITHLTKKDLTNLPQLRQLLLSRNKLKRMEEGAFKPLTDLETLRMIACDLEDVQQRMFAAQKRLVTLDLRYNKLTRLVKNSLFGLRNVKYFDIRGNQLSEIETGVFEDTPKLYFMLVSQNKLSSIP…
BursiconR-like	XP_022089235.1		ATGGAGTGCAGAGGTGTACTGCCATGGGCCAGCATTTGTTTACTCGGCCTTCTTAGTTTTCGTGCAGTGCTGTCGGGTCGTGTTTGTGTCCACGAGGAGTATAACTGTCAGGGGACGGTATGCTGCTGTCGCTACACGAACCAGGGGCTTTTCGCCGACTGCTCCAAGCAGAACCTGACAGACGTCCCCCCTCAGTTTGAATTCAAACGCACAGTAGAGCTAGACCTGAGCTTCAACAACATCAGCACTCTGCCCGCCGACGCATTCCACCATCTGCCTGATCTAGTCCACCTGAAGCTTTTGGGCAATCATCTCTCCACCCTTGATGAGGATGTCTTCAAAGGTCTCAAAAATCTACTGACACTGAATCTGCAGCTGAATCGATTTCAGCATTTCCCC…	MECRGVLPWASICLLGLLSFRAVLSGRVCVHEEYNCQGTVCCCRYTNQGLFADCSKQNLTDVPPQFEFKRTVELDLSFNNISTLPADAFHHLPDLVHLKLLGNHLSTLDEDVFKGLKNLLTLNLQLNRFQHFPSKSFRNGHTANLRKLHLDSNYIREVPDDAFLGLPALHHLNLNSNHLTSIPTRALRHLGALRFLHLEKNSIRVVPDHAFVNNTNLTELSLNHNLIVHLSAHPFAGLVKLEGLQFMNNSIESIAHTTFRNLPALHKLAISDVRNLSVFPDLTGTTSLSELVIERCSLRAIPENFCDNRTSLTFLDLINNQIEILPSFSKCSSLKILLLGRNKLKSIEGRPFDGLENLYELYLPENKITYIPADAFQNLTNLHSLSLSNNSISKIESQA…
GPA2/GPB5R-like	XP_022091039.1		ATGAAGGTGTTAGCCCGAGTGTTAACCTCGACATCGTACCGTGTATTCTTGATGTACCTGTGCCTGATGCGAACCCCCTCCGCTGGGGAGGAGAGCGTGCCGTCCGCCGCACCGGAGCTGGCCGACGACAGCGACGACGACCAGAACCCAACATGGGGAGTGGGCAATGACGGTCCCACAGAGACTGAGGTGGACCTGGACACCGGGTACCGGGACGTTCCTTGCCCGGCCGGCTGCATGTGCAACCCACTGTATAGCAAGGAGGCCGTGCCGGCGTATGGTGTGGAGTGCTCCGGCGAGCACATCACATCCATACAGCAAATGGTGTTACCGGAGGAAACTCAGCATCTATCTCTTACCGACACAAACGTGGAGAAGCTGACCCCGGACAACTTCGCC…	MKVLARVLTSTSYRVFLMYLCLMRTPSAGEESVPSAAPELADDSDDDQNPTWGVGNDGPTETEVDLDTGYRDVPCPAGCMCNPLYSKEAVPAYGVECSGEHITSIQQMVLPEETQHLSLTDTNVEKLTPDNFANFTVLNTITLKQNHKLRTIEPGTFHNLEELTGIILTHSPLLKEIGPGVFGNLPRLNSLSLESCGLESAPNLTTLYTNDGTLKDLVLSHNQIFALKPHTFTGLPFEVYYLGLSHNVISSVYGKAFEGAKIYKLDLSGNPITYIEDNVFEGIVELTNVSLAETEITKLPTLGLKYIVELNIEGTPNLKHFPPLFKFQNIQRVRLHYFSHCCAFLFNTSENQHMAKMYNITEPAESSSCSTTPNPSSGTFDTRDFSVPRGSWAHLVEDD…
LGR101-like	Improved upon XP_022091156.1		CTCACCTCCGGAACTGCAGTGACTTCGTGTGTCCAGATGGTTCTTTTAAATGTGCTCGATCACATTGCATTGAATCGTCGCAGGTGTGCGACCGTAAAATTAACTGCATAGAATCCTGGGACGATGAAACTCAAGACTTGAACGATTGCACGCAGGAGTGTTCCTCATCTGGATGTAACTGCTCACACTTTGACATGCATTGCTCTAATCTCGGTCTACACGGGTCAACATTTAATATCAATGCTCAAGATACGCGCTTAATCAAACATTTCTATTTGGAAGGAAATAGTATGGGCTATCTTTTGGAAGACGGAAATGCTTTGAGTGGTTTGACGCGGATGATACTCCTGGATCTTTCGAATAACAACATTAGTTTCATAAACAAACAGGCACTGCTGA…	HLRNCSDFVCPDGSFKCARSHCIESSQVCDRKINCIESWDDETQDLNDCTQECSSSGCNCSHFDMHCSNLGLHGSTFNINAQDTRLIKHFYLEGNSMGYLLEDGNALSGLTRMILLDLSNNNISFINKQALLNVPHLQTLRLADNSITSLGNNTFSNLQSLMTLVLRGNSMSTLEEKAFIGLRQLTILDLSHQNIQSFQKMAFAGLTKLSNLNMSHNSLTDIPRGAFFGLNELEKLDIRHNKLQKIHAEAFYGLPKLRELYTDEYRFCCMARDMVSLEKCEPQPGIFSSCEDLMANVFLRGSIWVIGIMASVGNLVVILMRMNNKRDNRVHSFLITNLAIGDFCMGVYLLIIAAVDSFYRGHYIIYDKEWRNSGLCHFAGFLSTFSSELSVFSLTIITL…

## Sheet: Amphiura
Amphiura filiformis
Name	Genbank identifier	Method	CDS	Protein
IGF	GGVU01097807.1 and GGVU01097808.1, partial	Trinity	ATGAACATCTTGGCTTGGTTACTATACATCAAAGCATTGGTCTGCCTCCTTCAGCCCGTCAGTTCCATGGCCATGTGGGGAAGGCTATGCGGCAAACCACTAGCAGACATGGTTGCATTGGTGTGCGATGGCAGATACTATACCGGACAAACAGATTCACCACTTCTTTCAGAACGTCAAGCAAAATCGTTCACCTCGAATGGAGGCCGAAAACGGACGGGCAAAATCGTTACAGAATGCTGCGATAAACATTGTAATTTACAGATCATTGAAAGCTATTGTGCGCCATTACCAGAGGGACAAACAAGGACACAACTAAGACACTGGTTTCTTCATGAGAAGGAGAAAGAGAGCGCAAATGAAGAAAATAACACAGTGGAAGAACTTCCTCCACCGCCT…	MNILAWLLYIKALVCLLQPVSSMAMWGRLCGKPLADMVALVCDGRYYTGQTDSPLLSERQAKSFTSNGGRKRTGKIVTECCDKHCNLQIIESYCAPLPEGQTRTQLRHWFLHEKEKESANEENNTVEELPPPPPPRSEERDEEQVPDVSQDLTFSDHDWEDSIESETLNEAIVMLADAPLTEQNTEEELLHKKDIKSGTNTTMATQDEAREEDVILSESSDRTKGKGNRTHRPTHRPSSERKSRRRNSKEKKRNKSREKKNREGKKKNKSKNKKNRRRKNRHGEDDFTQPTDELITDIEVMHPQARVVSRSEPVHAVDDPTDPGSRSERSFLTTITAKLLDVIGLQQNSNHDRRR-
Octinsulin	GGVU01066696.1 and GGVU01060032.1, partial	Trinity	ATGGGCCTCGAGGAACAAGTACGTCTACGAATAGGTCCACGATACCTCTTTCTAAGCGTGGTACTCGCAGCGTTCTGCTGCTGTTATGTTGGAGCTCAGAGACACGAGAGGTGGTACTGTACTCCGGTATTTTCAATGTTACAATCTATGTGCGGGAGCTGCTATGCAGGAATTGACAAACGTTCAGACAACGTAGACAGAACGCCACAACAGTCACTTGATGCCTTCATTCAAAAAGAAGTTGCGTACAGTTTTATCAAGCGAACAAGTAGCGGGAACAGTTTCTTACGCGACTCCAGAAGTCAACATCGAGGTCTTATTGACGAATGCTGTACATCACAATGTGAGGCAGGGGAGATGATACTATACTGCTGTCAAGAAAGACAACGTGAATGGCAC…	MGLEEQVRLRIGPRYLFLSVVLAAFCCCYVGAQRHERWYCTPVFSMLQSMCGSCYAGIDKRSDNVDRTPQQSLDAFIQKEVAYSFIKRTSSGNSFLRDSRSQHRGLIDECCTSQCEAGEMILYCCQERQREWHSVRGFFNK-
Relaxin	GGVU01076954.1, partial	Trinity	ATGTCGATGGAGCTTACTCGGGTGTCCCCCGCCTCTGCCATTTTATTGGTGACAATACTTTTGATATGTACGCAGAAAACCAATGGAAGAAATACAGATTATTCATCACGGACAAGGGCTGATTGGCAAAGACTATGGGTAACAGAATCACATCAAAAATGCAATGAAGATCTTATACCACTCTGGAAAATAGCTTGTACATACGACATAAGGAAAATAACTAAAAGATCACCAGAATTTATAGCAGAACCCGATGCCAAAAATTTTCTTTTGGGACCAATACGGCATAAACGAGGCTTAAATGAGGAATGCTGCCACGAAGCCAAAGGCTGCGTCTGGGAAGAAATTGGGGAATACTGCAGAATGCATTCAAGAGCATCACACGTAAGCGGAAAGGTT…	MSMELTRVSPASAILLVTILLICTQKTNGRNTDYSSRTRADWQRLWVTESHQKCNEDLIPLWKIACTYDIRKITKRSPEFIAEPDAKNFLLGPIRHKRGLNEECCHEAKGCVWEEIGEYCRMHSRASHVSGKVDAR-
GSS	GGVU01002505.1, GGVU01002506.1 and GGVU01025905.1, partial	Trinity	ATGGCCACTCTACACAAATTCATTGCCCTCACATTAGGAACACTCCTCATTCTAGGTGCTACCTCCTCCGCAGACTCAGCTAAATATTGTGGATTGGCTTTTTCACGGGCAGTTATGGAAACATGTGCGAGACAAGTGAAAAGAACGGCACCATTATGGGAAAGACTTTACACAGCATCGAGAGTGAAACGTTTCTCCGATCCTGAATTTTGGAATGCTGTACTTGAATCTGACTCTGATATCTCTATGGACAAAAGACAACCTGCTGGTGTGGGCATGGCAACATACTGTTGTAATCATGGCTGCACAGATACAGAACTTTCACTGGTTTGTTAA	MATLHKFIALTLGTLLILGATSSADSAKYCGLAFSRAVMETCARQVKRTAPLWERLYTASRVKRFSDPEFWNAVLESDSDISMDKRQPAGVGMATYCCNHGCTDTELSLVC-
Multinsulin-1	NEW	Trinity	ATGAAGACCGTGGCAACTATTTTGATTGGCATCATGGTATTCTCCATGGCACACTGTGACTGGGTCGGTTTTAGGACTATTTGCGACCCTCCCTTTACCCCATCTTTATATATTGAGGATTTTTGCGGCGTCACTGTCAAACGTGAATATGAAGCAACAGATCCTCTCGGCTTCCTGAAAATGAGAGGCATGGTAAAGCGACTGAACCCGAACTGGCGCGAATTAATGAGTGAAGAATGCTGTTACGAGTCTTGCACATCAGAAGAAATTAAGGAGTTATGCTGA	MKTVATILIGIMVFSMAHCDWVGFRTICDPPFTPSLYIEDFCGVTVKREYEATDPLGFLKMRGMVKRLNPNWRELMSEECCYESCTSEEIKELC-
Multinsulin-2	NEW	Trinity	ATGAAGATCACGTTGACAATTTTCCTGGGGGCCATTCTCGTCTCCATGGTGACAGGTTATTTAACAGACGCCGAACATGCCGAAAGGACAATTGACTTGGCGAAAAGGAAAGACTGGTGCAACAACGCTGCACACGAGTTTAGCCGATTGTGCAACAACCGAAGAGATGCTCTCGATTTCCTGAACCTGAGAGACGTGAGGAATAAAGTCCACGCGTTCACCAATTATATCAAGGAAGCTGTTCACGAAGAATGTTGTGAAGAGAGTTGCATTAACGAAGAAGTTTTAGAATTCTGCTGA	MKITLTIFLGAILVSMVTGYLTDAEHAERTIDLAKRKDWCNNAAHEFSRLCNNRRDALDFLNLRDVRNKVHAFTNYIKEAVHEECCEESCINEEVLEFC-
Multinsulin-3	NEW	Trinity	ATGAAGATCACGTTGACAATTTTCCTGGGGGCCATTCTCGTCTCCATGGTGACAGGTTATTTAACAGACGCCGAACATGCCGAAAGGACAATTGACTTGGCGAAAAGGAAAGACTGGTGCAACAACGCTGCACACGAGTTTAGCCGATTGTGCAACAACCGAAGAGATGCTCTCGATTTCCTGAACCTGAGAGACGTGAGGAATAAACTCCACGCGTTCACCCAATATATCAAGGAAGGTGTTTACGAAGAATGTTGTGACGAGACTTGCATTGACGAAGAAGTTTTAGAATTCTGCCCCTGA	MKITLTIFLGAILVSMVTGYLTDAEHAERTIDLAKRKDWCNNAAHEFSRLCNNRRDALDFLNLRDVRNKLHAFTQYIKEGVYEECCDETCIDEEVLEFCP-
Multinsulin-4	NEW	Trinity	ATGAAGATCTTGTCAACTCTATTGCTCGTGAGCCTAGCAATCTCCATGGTTGCATGTTTTCCAGACAATTATCTTCGTACATTGCTGGATGCATTGGAAAAAATATCAGATTCTGACGCAACCGGCAAGAGGCAAATGTATGCTGACCCGGATCTTGCGAGACCCCCCGCTGTCTTTGATTGGCAGGATTGGAGCGGTAAGAAAAAAATTTGCACAGCTTTCGACCAACAGCAACATTTTAATGGCGTATGCCAGAAGCGCAGAGATATCCCGCAACAGCTGGACACGCCGGATGCTCTTGGTTTCCTGCAAGCGAAGAGAATCGCTGGTTTCGAAAAGGACGTCTACGAAAGTATGACCGAAGAATGTTGTTTAGAGGGGTGCACCAAAGGAGAAGTT…	MKILSTLLLVSLAISMVACFPDNYLRTLLDALEKISDSDATGKRQMYADPDLARPPAVFDWQDWSGKKKICTAFDQQQHFNGVCQKRRDIPQQLDTPDALGFLQAKRIAGFEKDVYESMTEECCLEGCTKGEVQELCP-
Multinsulin-5	NEW	Trinity	ATGAAGACCTTAACCATTTTGATTGTGGTCTTATTCGCCACGATGGCTGCCGGTTATCCAGGCGCATTAACCAGAGGAACAAACATGGACTCGATGAATTTGAGGGCTGATTTTAAACTAAAACTTTGCGGAACAGAGCTGACGTTGGAAAGATACTACGCATGCGGGAAACGAGACCTAAAAGATGCTCTCACATTCCTGGAAGATGGGGCGAACAGAAAGCGCGATCTCCATGAAGAATGTTGTGTCGAAACGTGTAGTATGAATGAAATTGAAGAAGATTGCTGA	MKTLTILIVVLFATMAAGYPGALTRGTNMDSMNLRADFKLKLCGTELTLERYYACGKRDLKDALTFLEDGANRKRDLHEECCVETCSMNEIEEDC-
Multinsulin-6	NEW	Trinity	ATGAAGATCACGTTGGCCATTTTGATCGGAGTCCTTGCGGTCTCCATGGTTGCAGCTATTCCAGACGGTTATCTTCGATCACTCATGGATGCATTGCAACAAATAGAAAGAGCCGATTCTGGTCATGCTGGTGTAGACGCAACAGCCATGAAGACGGCCGAGAGGGAAGTTGAAGGGGTTAAGCGGGGCGGAGTTACGCCCCTTTGCAAATCAGCTAAGGATCGGGCTGGCAAGTTCTGCGTATATTGGATAAACCGTCGCGATATCGAGGTGTCCATGCCAGATGCTCTTGGTTTCCTGAAGACAGAGGTGCAGGCGCGTGATCTTAACCATGAATGTTGTGTCGAGACTTGCAGCGATGAAGAGGTTAAGGAACATTGCGTAATGACAAAATAG	MKITLAILIGVLAVSMVAAIPDGYLRSLMDALQQIERADSGHAGVDATAMKTAEREVEGVKRGGVTPLCKSAKDRAGKFCVYWINRRDIEVSMPDALGFLKTEVQARDLNHECCVETCSDEEVKEHCVMTK-
Multinsulin-7	NEW	Trinity	ATGAAGATCACGTTGGCCTTTCTGATCGGAGTAATTACACTCTCCATGGCTGCAGCTTATCAAGACACTGATCTTCGAACATTGCTGGATGCGTTGGAGCAAAGCTTAAGGGCAGATTCTGGTGACGCACCATCCATGAAGACGAGCAAGAGGGCCGATTGGGAGAAAGAATTTAGATCTAGGGCCGAGTGCGAGAGACAATGGAAACTGGAACTCGACGGACACTGCATTTCCCATCCATATCGTCGCGATATGCCAGATGTAGATGCTCTCGCTTTCCTTAACAAGCGTGGTAAAAGCCTTAACGGTCTTTACCATGAATGTTGTGACGAGAGCTGCAGCATGGAAGAATTTGGAGAACATTGCACTCAACGCCCAGAATCACAAGAGGGTTTTAAT…	MKITLAFLIGVITLSMAAAYQDTDLRTLLDALEQSLRADSGDAPSMKTSKRADWEKEFRSRAECERQWKLELDGHCISHPYRRDMPDVDALAFLNKRGKSLNGLYHECCDESCSMEEFGEHCTQRPESQEGFNPFKLGK-
Multinsulin-8	NEW	Trinity	ATGAAGATCTTGTCGACCATATTCATTGGAGTACTGGCAATCTCAGTGGTTGCAGGTTATCAAGACACTGATCTGCGAACGTTGCTGGATGAATTGAAACAAAGAGCCGATTCTCGTGACGCAGCAGCTATAGATACGAACAAGAGGGATAATGAAGGGAATGAAAAAAGATTCGTATCAATGAGCCATTCACAAGCATGCTACTCGGACTTATATACTTACCGTAAACCAGGTATATGCCCCACACGGCGTAGCGAAGATATCCAGCAGTTGGGCATGCAAGGTGCTCTCGCTTTCCTGAAAAGAGAGATGGTGAAACGAGACCTTTTTCACGAATGCTGTGTTGAGACCTGCACCACTGAAGAAATTCAAGAAACTTGCTGA	MKILSTIFIGVLAISVVAGYQDTDLRTLLDELKQRADSRDAAAIDTNKRDNEGNEKRFVSMSHSQACYSDLYTYRKPGICPTRRSEDIQQLGMQGALAFLKREMVKRDLFHECCVETCTTEEIQETC-
Multinsulin-9	NEW	Trinity	ATGAAGATCTTGTCGGCCATATTTATTGGAGTACTTGCATTCGTCGTGGTTGCAGGTTATCAAGAAACTGATCTTCGAACGTTGCTGGAGGCATTGAAACAAAGAGAAGATTCTGGTGACGCACCAGCCATTAATACGAACAAGAAGGGATGGACTGATGCCAGAGATGGTTGCGAGGCAAACTTAAATGTCAAAGTTTCACAACTATGCCGCCGGGAAGATATACAGCAGTTGGACACGCCAGATGCTTTCGCTTTCCTGAAAAGAGAATTGGTGCAGCGTGACCTATACCATGAATGTTGTGTCGAGCAATGCGACGCTGAAGAAATTGAAGAAACGTGCTGA	MKILSAIFIGVLAFVVVAGYQETDLRTLLEALKQREDSGDAPAINTNKKGWTDARDGCEANLNVKVSQLCRREDIQQLDTPDAFAFLKRELVQRDLYHECCVEQCDAEEIEETC-
Multinsulin-10	NEW	Trinity	ATGAAGATCTTGTCGACCATCTTGATTGGAGTACTTGCCGTCTCCATGGTTACAAGTTATCCGGATACTTATCTTCGAACATTACTGGATGCATTGGATCAAATAGTAGATTCTGATGCAACATCCAAAAAGACGAATGAGAGGGCGCCCGACGCATACGCGATGAAAAGAGGGGAATATAATTGGAGTGGTACAAAGACACTTTGCGGTGGCACGTTGCAGACATATAAAGGAAATATTTGTTGGGGAAAGCGAGAAGCTAAAGACGCTCTTGCATTCCTGGAAACGGATGATCGTCAAACGGACGCGGACCCACTAGGAATATGGGCACTTATATCTACCACGCTGAATGAGGAATGTTGTGGGGAGGCGTGCTACCGCGAAGAAATTGCCGAAACA…	MKILSTILIGVLAVSMVTSYPDTYLRTLLDALDQIVDSDATSKKTNERAPDAYAMKRGEYNWSGTKTLCGGTLQTYKGNICWGKREAKDALAFLETDDRQTDADPLGIWALISTTLNEECCGEACYREEIAETC-
Multinsulin-11	NEW	Trinity	ATGAAGATCTTGTCGACCATCTTGATTGGAGTACTTGCCGTCTCCATGGTTACAAGTTATCCGGATACTTATCTTCGAACATTACTGGATGCATTGGATCAAATAGTAGATTCTGATGCAACATCCAAAAAGACGAATGAGAGGGCGCCCGACGCATACGCGATGAAAAGAGGGGAATATAATTGGAGTGGTACAAAGACACTTTGCGGTGGCACGTTGCAGACATATAAAGGAAATATTTGTTGGGGAAAGCGAGAAGCTAAAGACGCTCTTGCATTCCTGGAAACGGATGATCGTCAAATGGACCCACTAAGTACATTTATATCATTGGCACTTATATCTACCACGCTGAATGAGGAATGTTGTGGGGAGGCGTGCTACCGCGAAGAAATTGCCGAA…	MKILSTILIGVLAVSMVTSYPDTYLRTLLDALDQIVDSDATSKKTNERAPDAYAMKRGEYNWSGTKTLCGGTLQTYKGNICWGKREAKDALAFLETDDRQMDPLSTFISLALISTTLNEECCGEACYREEIAETC-
Multinsulin-12	NEW	Trinity	ATGTTGGTCTCCGTTTTTCTGCTTGTCACCGCCAGTGCCGTATATGCAGCTCCAAATTTATTTGAAGACCTATTACGACGTGATCATGTTGAACAATCTGGCAACATAACTTGCATGGCTTATGCCACCATGTTAGAATACGAGCCAAATGAAGAGGCCTATACTTGGTGTGATGCTAACTTGGAACATCAGAGGGAAGGAATATGTTCTTGTGTGGAGTACATCAAAGAACACAACAAGAAAAGATCACTTTTCAAGAGAATGGCAGAAGTGACTGAAGATGTAGCCAAGAGGTTTCTGGAATCTCTCTTAGTGCTGGAAGTAGAGAGAGCGCGTCGTCCTAAGACAAGCCTTCAGGAAGAATGCTGTAATGAAAGCTGTTATGTACAAGAGGTGTAT…	MLVSVFLLVTASAVYAAPNLFEDLLRRDHVEQSGNITCMAYATMLEYEPNEEAYTWCDANLEHQREGICSCVEYIKEHNKKRSLFKRMAEVTEDVAKRFLESLLVLEVERARRPKTSLQEECCNESCYVQEVYDHCDKHFDGSIYDLFRS-
Multinsulin-13	GGVU01076924.1	Trinity	ATGAAGATTTTGTCGACCATTCTGATGGGGACCCTAGCTTTTTACATTGGTGTTTGCATAACAGATGCAAAATCTAATAGTGAAGAGCCTGACGAACACACGACCACGACCGCGCCGACGACTGTAGGTACAGATGACGGTAATGCAATATTGATGAAGAGATCATGGAGTGGTACTAAACATCTGTGCGGTTACCAGCTCAATAATGAGAGGAGCAGTGTCTGTGGTTTCAAACGAGATGCCGAAGATGCACTCGATTTCCTGAAACAGGACATAGTTAAGCGTTCGTTGACTGAAGAATGTTGTCATGAGGGCTGCAGCTGGGAAGAGATTAAAGAAACATGCTAA	MKILSTILMGTLAFYIGVCITDAKSNSEEPDEHTTTTAPTTVGTDDGNAILMKRSWSGTKHLCGYQLNNERSSVCGFKRDAEDALDFLKQDIVKRSLTEECCHEGCSWEEIKETC-
Multinsulin-14	NEW	Trinity	ATGAAGATCTTGTCAACTGTATTACTCGTGAGCCTAGCAATCTCCATGGTTGCATGTTTTCCAGACAATTATCTTCGTACATTGCTGGATGCATTGGAAAAAATAGCAGATTCTGACGCAACCGCCAAGAGGGGACTGTATGATGACGAGGATCTTGTGAGAAAACCTGGTGTCTTTGATTGGGAGGATTGGAGCGGTAACAAAAATATTTGCGGAAGGCACACCCAAAACCAATATTATAATGGCGTATGCCAGCAATATGAAGGTACTGGCAAGCGCAGAGATATCCCGCAACAGCTGGACACGCCGGATGCTCTTGGTTTCCTGCAAGCGGAGAAACGCAAGGACGTCTTCGAAAGTATCAACGAAGAATGCTGTGCAGAGCAGTGTAGCAAACAC…	MKILSTVLLVSLAISMVACFPDNYLRTLLDALEKIADSDATAKRGLYDDEDLVRKPGVFDWEDWSGNKNICGRHTQNQYYNGVCQQYEGTGKRRDIPQQLDTPDALGFLQAEKRKDVFESINEECCAEQCSKHEIQELC-
Multinsulin-15	NEW	Trinity	ATGAATATCTTGTCGACTATTTTCATTGGCATCTTTGCATGCGCCATGGTTGCAGAAGGCTTTGATCTTCCCGGCCGCGAACCCGGCCCTCTTGCATCTTATGTCGCTGATAATACATGGACTGGTAAAACTAATATTTGCAATTATGAACAACAAGTTGTATATCACAGAGAACTTTGCGGGCACCAAAAACGAGAAATCGAAGCAGAAGATGCTCTTGGCTTCCTGAAAATGAAATTAAGAGGTATGGAAAAGCGAGGCGGATGGCAGGAATATATGAACGAAGAATGCTGTATTGAATGGTGCACCATGGAAGAAGTTAAAGAGTTAGATTGCTGA	MNILSTIFIGIFACAMVAEGFDLPGREPGPLASYVADNTWTGKTNICNYEQQVVYHRELCGHQKREIEAEDALGFLKMKLRGMEKRGGWQEYMNEECCIEWCTMEEVKELDC-
Multinsulin-16	NEW	Trinity	ATGAAGATATCGTTGACCATTTTCTTATGCATCGTGGGATTCTCCATGGTTGCAGGTTTTTTATCAGACGCAACATCCAAAAAGACAAATGAGGAGGCGTTATATGCACAAGCGATGAAAAGATCTTACATACTAAACCCATGGTCGGGATGGGCTGGTGGAAAGACGGAATGCAACACCCAGACGCAAGAAAGCGATTTTGATCATGCTTGCCGCCTATACGGTAGAGATGCTCTCGATTTCCTGAAACTGAGAGATGTGGTAAAGCGAGCCTCGTTCAACGATATCAAGGAATGGATTCACGAAGAATGTTGTTTAGAGCGTTGCATCGTGGAAGAAGTTGTAGAATTATGCTGA	MKISLTIFLCIVGFSMVAGFLSDATSKKTNEEALYAQAMKRSYILNPWSGWAGGKTECNTQTQESDFDHACRLYGRDALDFLKLRDVVKRASFNDIKEWIHEECCLERCIVEEVVELC-
Multinsulin-17	NEW	Trinity	ATGAAGATCTTCTCGACTATTCTGATCGGGATCCTAGCGTTCTACGTGGGCATTACCATGACAGATGCAACAAAATCAATCGATGAAGAGCCTGATGAACTTAGTGTGCAGGGCACGACAACTACGGGCACGACAACTGCTGCGGTGGGACGTCGTGATGATGATGGTGATAGCAGTACGTTGATGAAAAGATGGTACGGCACCGTGCAGCTGTGCGGCAGCCATCTAACTAAAGTGAAGAGCGTTATTTGCAATCCAGGACGGCCATTCAAACGAGAAGAATCTGAAGCTGCCCTGGCTTTCTTGAAAGAGGAACGAGCGAAACGGTTCCTTCAAGCAGACCAGCAGCTGCTCCATCAGCAGCAGCTCCATCAGCCTAGCTTGCGATTGTGGGGAGGC…	MKIFSTILIGILAFYVGITMTDATKSIDEEPDELSVQGTTTTGTTTAAVGRRDDDGDSSTLMKRWYGTVQLCGSHLTKVKSVICNPGRPFKREESEAALAFLKEERAKRFLQADQQLLHQQQLHQPSLRLWGGLTEECCNEHCSVEEINEVC-
Multinsulin-18	GGVU01069010.1 and GGVU01069011.1, partial	Trinity	ATGAAGATCTTCTCGACCATTCTGATTGGGATCCTAGCGTTCTACGTGGGCATTACCATGACAGATGCAACAAAATCAATCGATGAAGAGCCTGACGAACTTAGTATGCAGGCCACGACAACTGTGGCAGCAAGACGTCGTGATGATGATGGTGATAGCAGCACGTTGATGAAAAGATGGAACGGCTACGTGCAGCTGTGCGGCAGCCATCTAACTAAAGTGAAGGGCGTTATTTGCAATCCAGGCGCGCCATTCAAACGAGATGAAGGTGAAGCTGCTCTGGCTTTCCTGAATGAAGAAAGAGCGAAACGGTTCCTTCAACCAGATCAGCAGCAGCTCGATCAGCCTAACTTGCGACTTTGGGGAGGCATATCAGAGGAATGTTGCAATGAGCATTGC…	MKIFSTILIGILAFYVGITMTDATKSIDEEPDELSMQATTTVAARRRDDDGDSSTLMKRWNGYVQLCGSHLTKVKGVICNPGAPFKRDEGEAALAFLNEERAKRFLQPDQQQLDQPNLRLWGGISEECCNEHCSLEEVNEYC-
GonadulinR-like	NEW	Trinity	GTGCCTCATGTTCGTACTTGCCTTCCGCGGACAGATGGTATATCTTCATTTGAAAACCTGTTACGTAATATGGTTCTCAGGGTATTTGTGTGGACCATTGCCCTTTTAACTAGCATTGGTAACATAGGTGTGTTTATCAGTAGGCTTATGATGAAAGCTGAGAGTCGCCTTCACTCCCTTGCCGTTTTAAACTTATGTGCCGCCGACTTTATAATGTCTATTTATCTATTCAGCATCGCTATTCATGACGTAATGTATCGGCACAACTATAATAAATATGCGTTTGATTGGATGGAAAGTTGGAGTTGTAGATTCTCTGGATTTCTAGCCATGTTATCCGGAGAAGTGTCCGTCCTTATTCTTACATTTATTTCCGTGGAAAGATGCCTTACCATTGCG…	VPHVRTCLPRTDGISSFENLLRNMVLRVFVWTIALLTSIGNIGVFISRLMMKAESRLHSLAVLNLCAADFIMSIYLFSIAIHDVMYRHNYNKYAFDWMESWSCRFSGFLAMLSGEVSVLILTFISVERCLTIAFPYRMYKLGQKELVVVLSCIWFAGATIGWIPLAVPSFFGNFYGSNGVCFPLHIHDPSQKGWEYSAFVFLAINATAFCTIFISYIGMFRSIQNTRKATAHIGMRGDMNYAKRFFFIVLTDLLCWLPIAILKILALCNIVVSETLYGWIIVFVLPINSALNPILYTMSTTSFTQWFHKQLKRGKCQTVSSTNGYLNCNHELLTTRHGGRGSSLSETTEFTLAAVSRRSCSDIKSDLPSSRTYSNQSTNCQTMQKFQGVQNLKSPQTCS…
Dilp7R-like	NEW	Trinity	GGAATAACAGCATCCACACACTTGAGATGGGTTGTCTTGACACGCTGCTTTCTCTTGTGGGATTGGATTTGCGTCTCAATCCATTTATGTCCTTTCCTCCGGACTTGTTTGAAGCCTTGGGAAGAAACGATCCCTTGAATTTGGAATGGGTATACTTCGACCATTTTCATTTGTGTGGTTACGCTCCACGTGTTCGCCATTGCATCCCAAGGACTGATGGCATCTCGTCTACAAAGAATCTCCTGGCCAATGCTCTTCTTCGCTCTTCGGTATGGATTGTAGCCGTGTTGGCATTCATAGGCAATCTGTGTGTTCTTCTTGCAAGATGCTTTCTCCGCGAAGACAACCGTATTCATTCTTTTTTCATTACAAACTTAGCAGTTGCCGATTTGCTCATGG…	NNSIHTLEMGCLDTLLSLVGLDLRLNPFMSFPPDLFEALGRNDPLNLEWVYFDHFHLCGYAPRVRHCIPRTDGISSTKNLLANALLRSSVWIVAVLAFIGNLCVLLARCFLREDNRIHSFFITNLAVADLLMGLYLIIIGSYDMIFRGDYILHDITWRNSPMCKICGFLSFLSSEMSXXXLSVITLDRFICIVHPFKFKNRFLGQAAILMVCLWILWITLGALPVLHTAYFGNYFYGANGVCLPLQINYPYAQGWEFSLIIFVIFNLMAFIFIVYAYLKMFLTIRWSSLAMRSTKKNQEWPLVKRFGLIVFTDFLCWMPIIIMKFVAFGGVQVSNGAYAWFAIFVLPVNSALNPILYTMTTKLFKQKILIPLGILQPKRQKPYDPNSSVDDSLVSKASG…
BursiconR-like	NEW	Trinity	CGCCAAACCAAGTCATATCACCATACCCCTGATGCCTCTTAAAGATCGGAATCACAGCCAGCATAGTCTCAGTCCATCAGACCATCCATGTGAAGAAAGAAAACCAACAGCCCAAACATCAACACCAGAAACAGCTAATGAATCAGCTAATAACAACAATAAACAACCCTTGATGAAAAAACTAAGTGCTGTCTTACATGTGGATTACACAATCAGTGATTTGGATACAGTTCCAGAAGAGAGATGCAGCAGTCCAGATAATCCTGAAATATACCTTGAAGTTCCCAATGTACAAGGACAATCATTTATGATACCATTGCTGTGAATACGTAGGCAGTATGATAGCAGGTGGTCAACCTGCTGTCAACAATGAGGTGAATGAGACCCATTATTGGCTAG…	YHCCEYVGSMIAGGQPAVNNEVNETHYWLGADELDFFFSNSGGTSDYNQSVGDVYDFKSYYGSYDDFDPVLPFFLSSPSFSSDYSEVIMITGPLPIRNISCIPQPDPFMPCSDLFGSWYLRVGVWLVFLLALIGNGIVISVIVFSRTKIDVSRFLICNLACADFAMGIYLGFLAGVDASTLGVFRKYGVDWQLSEGCGVASFLAVFSSELSIFTLCVITLERFYAIKHALHLEKRLKLQHAMVIMCLGWVFAIVAASLPIFGVNRYYRYAVCLPFDISTTGAKAYISGLMLLNGFAFIIIMACYISIYCAIQGSHAWNCNDSRVARRMSLLVFTDFACWAPIAFFGLTSAFKLDLISLYWAKVLTVFVLPVNSCANPFLYTILTKQFKKDCRVILQWVN…
GPA2-GPB5R-like	NEW	Trinity	CACCTGCCTTCTAAATACAGTTCTGCTGATGTTTCGTATTCTTTCATAGGGGATAGAATCTATGATCCTATTCCATTTCCATCTAGTTTGGCAGACTCTATTCAAACCAGTGGTCCAGTACCTACTAGTTCAAAAGATTATCGTTGGATTCCTGCAATTGATCACAATATAAGTCATTTCTACAATGGAACAGAGTGTAATCCGTTTGTAGAAAAGAACTATTCAGCTGTAAAATGTACCCCCAAACCTGATGCATTCAATCCATGCTCCGATGTCATGGGCTATATATTCCTTCGTATTGTTGTCTGGTTTATTGCAATGACGGCTTTAATAGGAAACTTTGTTGTTCTTTTGGTTTTATTGGCTTACCGAAGCAAAATGACTGTGCCCAAATTCCTC…	HLPSKYSSADVSYSFIGDRIYDPIPFPSSLADSIQTSGPVPTSSKDYRWIPAIDHNISHFYNGTECNPFVEKNYSAVKCTPKPDAFNPCSDVMGYIFLRIVVWFIAMTALIGNFVVLLVLLAYRSKMTVPKFLMCNLSFADLCMGVYLLMVASVDLHTLREYFNYAISWQHEAGCKVAGFISIFSSELSIFSLTVLTIERWYTIIYAIDLNKRIRLRQAAKIIISAWLFAILIAALPMLGVGSYGVTSMCIPFYIGEDTSAISYAYVLFILLFNALAFLIICACYIKMYLTVHNPHTVMQRKDSKVAKRMAVLIFTDFACWAPIAIFGLSAAFGKPLLTVNQSKVLIVLFYPINSCANPFLYAIFTKAFRRDFFVMLAKHGMFEKQAMKYRGAHSDHRS…
GRL101-like	NEW	Trinity	GCAAGAGATATCAGTTGGCGCTTTCACGGGCCTTCACAGTCTGACTTTCCTTAACCTTTCTAATAACGCTATAAAAACCATACCAAATGGAGCCTTCTTTGGTTTAAGAAAACTACAAATACTAGATATATCCAGCAACAAGATATCGAATATAAATGATAAAGTGTTCTACGGGCTTCCGGAATTACGTGAACTGTATACGGACGAATTCCGATTTTGCTGTATCGCCAAAGGTATAGCGAAGTGTTATCCAGAGCCTGACGAGTTTTCTTCTTGTGAGGACTTGATGTCTAATGCATTCTTACGCATGTGTCTCTGGATTCAAGGAATCATCGCCTTCGTCGGGAACTTAGTTGTGATAATATGGAGATTGAAAAATAAGCGGGACAATAAGGTGCA…	QEISVGAFTGLHSLTFLNLSNNAIKTIPNGAFFGLRKLQILDISSNKISNINDKVFYGLPELRELYTDEFRFCCIAKGIAKCYPEPDEFSSCEDLMSNAFLRMCLWIQGIIAFVGNLVVIIWRLKNKRDNKVHSFLITNLAFGDFCMGIYLLIIAVVDAYYRGVYSLFDKQWRQSELCKFAGFLSTFSSELSVFSLTIITLHRLASIVFPFRIKDMEFRGAFRVMIGTWMFVIILAGIPLVGLPYFGNFYGRSGVCLAFHITPDKPSGWEYSVFIFLVVNFITFATIAVSYAVMFVVARRTQKAVMRSRDAKAGDSMARRMTLIVATDFVCWMPIILLGIASIGGAYIPPQVFAWVAVFVLPVNAAINPVMYTLVTTPYVRRAFNRARSSLANTSFSMS…

## Sheet: Anneissia
Anneissia japonica
Name	Genbank identifier	Method	CDS	Protein
IGF	GAZO01007334, GAZO01007335 and GAZO01007336	Trinity	ATGGGATTAATTACTCGCTTGGCTTTTTTTGTGATACTGCTTTATGGAACGCAGTTACGAAGCGTCAACTCACAACCAAATCACGTCCGTCGTTACTGTGGGTCAGAACTTACTAGTGAACTTGAGCGGAGATGTGCGCTCAAAGGAGGATTCAATAGCCCCAAAAAACAAGAAAGTCCATATTTATGGAATCAAGAAAAAAGAATAGAAGCTACTAGCACGGAACGCGCCAAGGAAATAAACATTGTTTACGAATGCTGCCATTCTGCTTGTACCGAAGCATTTCTCGACAGCTTTTGTTTATCTTCGAATAAGGATGAAGATACAACGGTGGAGAGCGATACAGTAGAAACAACTACAATCACTGGAAAAAAACGTAAGCCTACTAGAAAACCAAAA…	MGLITRLAFFVILLYGTQLRSVNSQPNHVRRYCGSELTSELERRCALKGGFNSPKKQESPYLWNQEKRIEATSTERAKEINIVYECCHSACTEAFLDSFCLSSNKDEDTTVESDTVETTTITGKKRKPTRKPKNPLKSRKKPKGSSEINSEQSASNTELPSQTEPTKDKNGRGDKNKKDKCNKKSRDKNNKPCRRKSRKDSRRKNRKKNKKNKPTRRPKRWDSETTTLSDFLFSQRFLQRAYDSDIDVDEITTEFGVVPEEDISSSLSEEELSSNQVKSDDQRTEHLPADIEVQSFDNIMSRVNSKKKTAAIKLKELTNQFSRLRQMQDATNAPRE-
Octinsulin	NEW	Trinity	ATGATGACCAAATTATTGTGTGGACAACATGAACACATTTCAACGGTTAGCCTAGCAATCACAGTAGTTGTAGTGTTATTTTGTCACGTACAAGTAGCAGGAGCCCGCGACTGGTATTGTGGTAATGCTGCAGATACACTAAAGGAGTTTTGCCAGAGCTGTTATGCCTCCAAACGAGCACACAATGCTTTGAGTCTGCCTTCGATAAAAGCAAAAAAAGATGGAATGTTTTTAACGAAGGAAGGTGCGTCTGGATATTTGGAGGCTAAAAGGACCAGATTGTTCTCATCACTTCATTTAAATCACCGTCAGCACGAAACAACGAATTTCGTCACGGAATGCTGTTACAACCCATGTAGTTCATTCGAAATGATTAAATACTGCTGTCCTACTAGGCAA…	MMTKLLCGQHEHISTVSLAITVVVVLFCHVQVAGARDWYCGNAADTLKEFCQSCYASKRAHNALSLPSIKAKKDGMFLTKEGASGYLEAKRTRLFSSLHLNHRQHETTNFVTECCYNPCSSFEMIKYCCPTRQIELHNRNPNSSEDK-
Dilp7 ortholog	NEW	Trinity	ATGGAACTTTTTCGAAGGCAAACATGCCTTGTTACATGGACGTGGTTGATAATGGCTTTAATTGGTTCTACATATTCACTGAGAGACTATTCAGATAGATCACACAATGACTGGGCACGGGTATGGACGGTAGAAAGTATGCGGCAATGTCATGAGAATTTAAGGGAGATGGTACATGTTTCATGTCGAAACGATCCTAGAAAAATCTCTTCAAAAAGAAGCATTTTTATACCACGAAATGAGGCTACTGGATTTTTATCAAGATTTCTGCGGACACGAAGACCATCAGAACTTCATGAAGATTGCTGTCTTGATAGCAGGGGCTGTACGTGGGAAGAAGTAGCTGAAATTGCATGTATTAATAACAGGAGAAGAATGCATAGACCAGGATCACCAGTC…	MELFRRQTCLVTWTWLIMALIGSTYSLRDYSDRSHNDWARVWTVESMRQCHENLREMVHVSCRNDPRKISSKRSIFIPRNEATGFLSRFLRTRRPSELHEDCCLDSRGCTWEEVAEIACINNRRRMHRPGSPVGR-
Insulin RTK	Improved upon XP_033096998.1and XP_033097029.1	Trinity	ATGATTGTAATTATCACGAAAACCAGCCCGTCGTGGTTAATGCTGTTCATTGTGATGGTTGTAGGATGCTCGGAATATTGCCATGCTCAAAAAAGGGATGTTAATGTTACGCGAAGGGAAGTTGCTTGCCTGTCCATAGATGCGAGAAATCATATTTCAAATTTGGCAGAATTTACCAATTGCACAGTTGTAGAGGGTTCAGTTCAGATTGTATTGATGGACAATAACAAAGAAGACGAAGTTGATCAATACTCTCTTCCAAACCTTATTGAAGTTACCGACTATGTGCTGCTGTACCGTGTGACAAAACTGAAAACACTGCGGAAACTCTTTCCAAACCTTGCAGTAATCGGTGGCGCAAATCTTCTGTACCATTACTCTCTGATTATTTTTGAGATG…	MIVIITKTSPSWLMLFIVMVVGCSEYCHAQKRDVNVTRREVACLSIDARNHISNLAEFTNCTVVEGSVQIVLMDNNKEDEVDQYSLPNLIEVTDYVLLYRVTKLKTLRKLFPNLAVIGGANLLYHYSLIIFEMFDLEEVGLESLVSIKRGAIRIEKNPVLCYIDMIDWNLISEEHKENSYFGYNKDQGLCLNSCPEPPGTCTKTLANGEIKELCWNEYSCQKVCPAACKDNCYDERTCCSDLCIGGCSQPSKDPYHCNACRYYNNAGECVSQCPNSYFVWRDHRCVIKDLCYQVSGYLMSENLCVDSCPNGFIVGVDRFTCEPCKPGECNRECNSKQAIKSLQDAEKLKGCTFIKGSLKIEIKNTANISKGLEESLGKIEVVSGYISITHSYPLVTLDF…
GonadulinR-like	Improved upon XP_033108673.1	Trinity	ATGTGTTCATCAAAACTCGCAGGACTCATTTGTATTTTCGTTCTTCTTCCGTTCACATACTGTTGTCAAAGCGGAACGTTCCCTTGTGGCGATGATAAAGAGCAATGTTTTCCACAAGAATTCCAGTGTAACGATGTGGTTGACTGTACAAACGCCGCTGACGAACAGGATTGTGAGGAAAAAGCTGGCTTCGGCGATGACTTTGACCGACGCCACAACACAACGATAGTATTGAAGTACGATGTGGGCAATTACAACACCAACGTTTGCCTCATCCCCGTATACCCTCCGGTGTGTAAATGTGGAAACAAAACAGAAGTGGATTGTTCGGCGACAGGCATGACAACTATACCGCAAGCTATATCAAGGAATATTTCAAGATTGACTCTTCTCGGTAAT…	MCSSKLAGLICIFVLLPFTYCCQSGTFPCGDDKEQCFPQEFQCNDVVDCTNAADEQDCEEKAGFGDDFDRRHNTTIVLKYDVGNYNTNVCLIPVYPPVCKCGNKTEVDCSATGMTTIPQAISRNISRLTLLGNDIQTILNNSFVNFEQLHKLTLAQNGLVRMEINAFNGLTELKQLYLSENNIKEIPSGVFLPLKRLEWLVLDYNELTTLLGNPFKGLLSLYWLSVRHNKINDANIRTVLENLPSLAWLELDHNKITRIEAEDFARDTPMSTLSLKNNEVSYVHPLAFTSLINLLDLDLCGNKISELSPMQFKNLTKLDRLALGFNLFDSLPLNIFDDLVNLQSLRLEGITINNIDQRMFEKMEKLSIVYFSSFQYCSYAPHVRNCNPKTDGISSIYNL…
Dilp7R-like	Improved upon XP_033123728.1	Trinity	ATGGAGTACAGTGATAAATGCCGTCCGTTTACTAAAGTGCTTCATTGCTTACTTGTATTGCAGTTATTCTTCAGTTTTCACCTTGTGTTAACGTGCCGAGTTATTATTAATACGTGTCCTGATGTCCAGGAGGTAACGTCAAAAAGTCCGCATGGTGACTGTCCGGGTTTTCGATTTCCGTGCCAGAATTCTAGCCAGTGCGTGCCGGGGAATTTCATTTGCAACGGTATTAGTGACTGTGATAACGGCTCAGATGAACTACCGGAGGAATGTGCTACGAACAATCCCCTGTATACCAACATTTGGACCCATATCTACGGCTCGGAAAGAAGAGGAGGAGATGGTGATTCTTCTGACGAAGATTTCAACCCAGATAATGTCTGCGAAAATGGGACGTAC…	MEYSDKCRPFTKVLHCLLVLQLFFSFHLVLTCRVIINTCPDVQEVTSKSPHGDCPGFRFPCQNSSQCVPGNFICNGISDCDNGSDELPEECATNNPLYTNIWTHIYGSERRGGDGDSSDEDFNPDNVCENGTYPPNCTCYLKCISRHGGNADDGECESEVFCYTENTTGFTTVPRDLPTNTVLLDLSDNYISVVRKGDLDHLPYLRTLYFSRNRNLRFESDALTNNLTISELNLVGCQMGTIPDGLFSGMSHLMTLHLQYNNLVTINKDTLKGLDWLMELNLNHNEISDLNPMAFNHTPNLVILNIQYNKLQVLSPPLLEPLTQLKTLGMSFNQISEIKNGFFESQTHLQDLLLMGNKLTVIKVGMFQNLYGLLSMTLRENNIREVQANSLDHIESLQS…
BursiconR-like	Improved upon XP_033111248.1	Trinity	ATGAAAAAATACAAGAACATCGTGTTTGTTTTACTCGTACTTTTGAACATTGACTATGTGCTCTCCGACACATGCAAAGGTGATTGGATATTGTGCTGTAAGGTGTGCTGTTGTAGGACGGTTGGAGAGTCGAAACAAGTTAAATGTTTAGGACTTAATCTATCCAAACCGCCCGAGGATTTACCGCCTGACACGGCAGAACTATATCTGAACGACAATTCATTTAGCACTGTACATCCCGACACATTCATACATTTTACCAACTTAAAAGTGCTACATCTGGCTGACAATAATATTAGTCATTTGGACAAAGATTCATTCAAATCGCTGACACAACTGGAAGAATTATTTTTGTCAAGAAATATATTAACGACGTTTCCCAATGATGCCTTGAACTCT…	MKKYKNIVFVLLVLLNIDYVLSDTCKGDWILCCKVCCCRTVGESKQVKCLGLNLSKPPEDLPPDTAELYLNDNSFSTVHPDTFIHFTNLKVLHLADNNISHLDKDSFKSLTQLEELFLSRNILTTFPNDALNSGPTSLIHLSLNGNAIVDIPVGAFKNLTSLRTLGLEGNRLTKVPEEALSRCRRLEQLDLSRNHITVVQDNAFSSLARLESLRLDSNQIKTIGQKAFNGMKNLQQLELKGNLLTDVPAALQSLEKLTMLELSHNHIPYIPDGAFMHNSNLAKIVLDGNDIIMIGHGAFINLSKLTVLRLSRATKMHTFPNLNGTHNLQTIVIDNCGFSEIPQDLCKNMTKLETLELHYNNIKSIPDLSGCRSLRIINLGKNAISSLDNSPFKNLNNLQ…
GPA2/GPB5R-like	Improved upon XP_033115864.1	Trinity	ATGTTTCGTTGGCGGTGTTGGTATTTTTTCATCTTGATAATCGTCTTGAATGGCTACGTACTTCGCCACGTATATGCGGAGACTGTAACTTCAAATGTCCGATGCTCTAATCTTAAGCCTGGATGTCGATGTAGGTCGGAAATGGCATTCATCATTGATTGCGATGATGTGGATGTCGCATCAGTTCCCGAGCTGAATCTTCCAAGCGAAACTTCTGAATTGTACCTAACAAATGTGAGTCTTACAAGTTTAAATGCAGGAGATTTTGCCAATTTTCCCAACTTGAAATCGCTGGCACTGTACAAATCACCTAAGCTTGAAAGCATCAGAGAAAATACTTTTCGTCAACTTAAATATTTAAACTTACTACAAATTGATATTGCCCCCAAGTTGAAAACT…	MFRWRCWYFFILIIVLNGYVLRHVYAETVTSNVRCSNLKPGCRCRSEMAFIIDCDDVDVASVPELNLPSETSELYLTNVSLTSLNAGDFANFPNLKSLALYKSPKLESIRENTFRQLKYLNLLQIDIAPKLKTIEDGAFGNLPEFKHMTIGRTGITTVPNLTMIEPKAGLLQRVSLTHNKIEHLYESMFYGMNFLIYKLELEHNQITRIPAYTFEGLTVKDLDLSNNPIEGLVEDSFAGIDEDELDLINLSNTKIEMLPTKGLKKIKSLNIEDTPRLMQFPSVFVFEEIENAQLHYFSHCCAFTYETERNAPDSSKYNKTDEVKGCTTTAEPPYWPTTNNERTRAKTSPWIRGTTTMEPFDPLNHFDPSGRISSDAVPLVQTGHGVVMRRRSIGSSTHI…
GRL101-like	Improved upon XP_033108568.1	Trinity	ATGGAACACCGCTTGGTCCCTATGCTGCTCGCAATAGCATGGATATCGCTATGTGTTGTTAGTAAAAGCGAGCTTCATGGTTCGGTGAGCTGCAAATCCACGGATGTAAAGTGCGGTACAGGTGAATGTGTTGCAGCTAACAGTTCCTGTAACTCAATTAGCGACTGCCCCGACGGGTCTGACGAAAGCCCTGCTTATTGTGGATGTCGTCATGATGAATTTCAGTGCTATAATTCATGTATAAGTCTGTTTGGGCGATGTGATGGGACTTGTGATTGTGACTTCTGTGAAGACGAGCGTGACTGCGATTTGCACCAATGCCCAAGTACGCATATGAAGTGCGCCACCTCCCATATATGCATTCACCTCAGTTTACAATGTAATTTCGTTGACGATTGT…	MEHRLVPMLLAIAWISLCVVSKSELHGSVSCKSTDVKCGTGECVAANSSCNSISDCPDGSDESPAYCGCRHDEFQCYNSCISLFGRCDGTCDCDFCEDERDCDLHQCPSTHMKCATSHICIHLSLQCNFVDDCGDGSDEMCEHRECYTHEFQCANGECLKPGYRCNGEVNCRGGDTSDEDNCIENYDYIMCRSGRIFRNLFCDFFIDCELTEEDEKQNCSCDSADGFMCSTGVCILRSKLCDGQCDCRDLCEDENNCGDTVCSAGSDYFCAHSFRCLNSEFVCNGYNDCENKDDELCESRYKTDVGYECKLNSDMCQLDNNAFCYPTEIFCERRPQCQGGSNGSHCLVEALCNSNEFKCTNGMCIPDYLRCDNIADCLDHSDELNCESHPCEEGMWKCR…

## Sheet: Antedon
Antedon mediterranea
Name	Genbank identifier	Method	CDS	Protein
IGF	NEW	Trinity	ATGGGATTACTTACATACTTAGCTATTTTTGTGGTGCTGATTTGTGGAGTACACTTACGAAGTGTCGATTCTAGTCCAAAATATGCTCGTTTCTGCGGATCAGATCTTGCAAGTGAACTACAGAGGAGATGTCGGTCGCAGGGCTACAACGGTCCACAACAAAACTCACCTTTGTTATTTCAAGACAAAAAACCTCAAATTAGTGCGTCGATACGTTCAAAGGAAAAAGACATTATAGACGCATGCTGTCTTTCTCGCTGTACCGAGGCTTTTCTTGACAGCTTCTGCTTATCTTCAAATCCCGAAGATGACATTACTGTAGAGAGTGAAACTATAGAAACAACTACTATTGTTGGTAGTAAAAAACAACTAAAAACTAAAAAACCTAAGACGACTCGA…	MGLLTYLAIFVVLICGVHLRSVDSSPKYARFCGSDLASELQRRCRSQGYNGPQQNSPLLFQDKKPQISASIRSKEKDIIDACCLSRCTEAFLDSFCLSSNPEDDITVESETIETTTIVGSKKQLKTKKPKTTRKSGKSEKNRDDESQTENPRKDRQKEKNKNKDKNKKNREERNKCDKKTLKDKNGKPCVRKSKERKEKERSRKTRKRNKKNKPTRRPKRWDSETSTLSDFLLSQKLLQEIYDSDIDDRSIDDITTQFDALPEDDLSSSLSQEESSSNEVIQEAQRTEQFRPPLKPVPADTSEDSYNNNMYVSTGNTRNEQPPLDDDPVEKLKELRHIFAELEGDSTSSS-
Octinsulin	NEW	Trinity	ATGACCAAACTATTTGATGGACAGCATGAACACGTGGCAACAACTAGCCTAGTAATAACCATCGTTGTAGTGCTACTAAGTCAAGTGCAAGTTACAGACGCCCGAGACTGGTATTGTGGAAGTGCCGCAAATACATTAATGAACTTTTGTCAGAGTTGTTATGCAACTAAACGGTCTCATTCAAGTTTACCGTTGTTAAAATCAAAATCAGATGAAATGTTTTTAACAAAGGAAAGGGCGTCTGGATATTTGGAGGCTAAACGGAGTAGGCTGTTCTCATCAGTAAATTTAGATCGCCGTCAGCATGGCCAAACAAATTTTGTTACCGAATGCTGTTACAATCCATGCACACGATTCGAAATGATTAAGTATTGTTGTACCTCCAGGCAAATAGAATTC…	MTKLFDGQHEHVATTSLVITIVVVLLSQVQVTDARDWYCGSAANTLMNFCQSCYATKRSHSSLPLLKSKSDEMFLTKERASGYLEAKRSRLFSSVNLDRRQHGQTNFVTECCYNPCTRFEMIKYCCTSRQIEFNDTEGKK-
Dilp7 ortholog	NEW	Trinity	ATGGAAGTTTGTCGACGGCGACTATGTCTTCTTATGTGGACGTGGCTACTAGCAGTTTTAGTTGGTTCTACTTATTCATTACAAGATTATTCAGATAGGTCACACCATGATTGGGCACGAGTATGGACTGTAGAAAGTATGCGGCAATGTCACGAAGATTTAAGGGAGATGGTACATATTTCATGTCACAATGACCCAAGAAAAATTACTTCAAAAAGAAGCATTTTTATACCACGAAACGAAGCCACCGGATTTTTATCAAGGTTTCTACGCACCCGACGGCCGTCAGAACTTCATGAGGATTGCTGTCTTGATAGTAGGGGTTGTACATGGGAAGAAGTAGCAGAAATTGCATGCATAAACAACAGAAGACGTATGCATAGACCTGGATCACCAGTT…	MEVCRRRLCLLMWTWLLAVLVGSTYSLQDYSDRSHHDWARVWTVESMRQCHEDLREMVHISCHNDPRKITSKRSIFIPRNEATGFLSRFLRTRRPSELHEDCCLDSRGCTWEEVAEIACINNRRRMHRPGSPVGR-
GonadulinR-like	NEW	Trinity	CAAGATCAACGATCCAAACATAGGGAATGTGTTTGAAAATCTGCCATCTTTGGAGTGGTTAGAACTTGACAATAACCGAATTACTACATTGAATTCAGATAGTTTTTCCGGGGATACATCATTGTCAACATTGTCATTGAAAAATAATGAAATATCATTTGTGCATCCGTTGGCGTTAACATCTCTTGTGAATCTAGTGGAGTTGGATTTATCCAAAAACAGAATAGACAGACTGTCATCAGTGCAGTTCAAGAACTTAACCAAACTCAGTCATTTATCACTGGATTTCAATCTGTTTCGATCTTTTCCTGTCGATGTATTTTACGACTTAGTAGATCTTGAAATCTTGAGACTTGAAGGGATTACAATTAATAATATCGAACCAGCGATGTTTGAAAA…	KINDPNIGNVFENLPSLEWLELDNNRITTLNSDSFSGDTSLSTLSLKNNEISFVHPLALTSLVNLVELDLSKNRIDRLSSVQFKNLTKLSHLSLDFNLFRSFPVDVFYDLVDLEILRLEGITINNIEPAMFENLKXXXXXXXXXXXXXXXXXXXXXXXXXXXXXXXXXXXXXXAADFLMSIYLFIIAVQDHRFRDNYNQNARQWMDSIGCKMTGFLAMVSSEVSVLLLALISVERFVCIVYPYECRRLKKKKATIIISSIWTTCALIACVPMFVQSYFGNFYGTNGVCFPLHIHEPRLKGWEYSAAIFLGINLLALVLIIVSYVGMFMSIRTTRNASTVQIGYKGDMKYARRFFFIVLTDSLCWIPIVIIKLIALFNIPITENLYTWIVIFVLPVNSAL…
Dilp7R-like	NEW	Trinity	ATGGCGTGTACGAACAAGTTTCATTTCTCCATGGTGATTTGGCATTTGATGTTTCTGGTTTTCTTCTCTGCATTTCACCCAAGTTTAACATGTCGAGTAAATACCCATACATGCCCTGACAACATTCAAGAGGTGACGTCAAAGAATCCGCATGGTGACTGTCAGGGTTTTCGATTTCCATGCGTAAATTCTAGCCAATGTGTTCCTGGAAACTTCATTTGCAACGGAAATAGAGATTGTGATAATGGGTCGGATGAGCTCCCAGAGGAGTGTGCCACAAACAATCCCTTGTATACGAATGTTTGGAACCATATTTACGGGACAGAAAGGAGAGGCGGCGATGGCGATTCTTCAGACGAAGATTACAACCCAGATAATTTTTGCGAAAATGGAACATAT…	MACTNKFHFSMVIWHLMFLVFFSAFHPSLTCRVNTHTCPDNIQEVTSKNPHGDCQGFRFPCVNSSQCVPGNFICNGNRDCDNGSDELPEECATNNPLYTNVWNHIYGTERRGGDGDSSDEDYNPDNFCENGTYPSGCLCFLRCQSRHGSTADDGDCESEVYCNNMLGFTTIPRDLPLNTVLLDLSDNDITHVTREDLDHLPNLGVLYFPRNRKLRFEPDALQYRSLLELNLIGCQMGEIPDGLFKGMSNLSYLHLQYNELKTINRDTFMGLDNLYELNLNYNEISEFDPTAFNHTPYLQKLNVQYNRLKVLSPPLLKPLTDLQVLGMSFNEISDIKTGFFDSQTHLEDLLLMGNKLTVIKVGMFQNLYGLRSMTLRENKIHEIEAHSFDHVESLRSLFL…
BursiconR-like	NEW	Trinity	ATGAATAAATACGCAAGTTTTGTATTTGTTTTGCTCTTATTTTTGAACATTAAGTTTGTACTTTCGGACACAATGTGTAAAGGTGACTGGAAGTTGTGTACAGATGCGTGTTGTTGTCGAACTGTCGGAGAAGCTAAACATGTAAAATGCTCAGGACTAGATCTTATTAACATACCGGAGGATATACCGTCAGATACAGCTGAATTATATATGAATGACAATTTGTTTACAACTGTAAATCGTGATGCCTTCCTAAATCTCACCGACCTGAAAGTACTGCATCTTGTGAACAACAGAATTAATCATGTAGATGAAAAGGCTTTTTCAACCTTGACACAACTTGAAGAATTACTTCTGTCTGGAAACAACTTGAAAGCTGTTCCAATTGATGCTTTGAAC…	MNKYASFVFVLLLFLNIKFVLSDTMCKGDWKLCTDACCCRTVGEAKHVKCSGLDLINIPEDIPSDTAELYMNDNLFTTVNRDAFLNLTDLKVLHLVNNRINHVDEKAFSTLTQLEELLLSGNNLKAVPIDALNSGPRSLIHLCLSDNHITNLPANSFRNISKLRTLCIGGNPLTKVPEEALSTCRQLEKLDLSRNSITEIQDKAFRKLSRLESLRLEFCEISTIGQKAFNGMDNLAQLYLKKNRLADVPAALQSLEKLSWLDLSHNHIQYIPDGAFMHNTNLAKIVLDGNDIILVGNGAFINLSKLTVLKLSRATKMHMFPNLNGTYNLQTIVIDNCGFSEIPEDLCKHMKKLTTLELHYNNIKMIPDLSGCTSLKMINLGKNAITSLDNSPFKNLKNL…
GPA2/GPB5R-like	NEW	Trinity	TTTTACAGATTTTTGACAAATATCAGTCTTACAAGTATTAATTCTGGCGACTTTACCAATATGTCAAAGTTGAAAGCATTGACAATGGAGGATATGAGAAAGCTGGAAAGCATCAAAGAGAACGCATTCGATCAACTTCCAACATTAGACATTTTACAAATTGAGAATTCCCCAAAGTTGAAGACGATCGAAGACGGGGCATTTGGTATCCTGCCACAATTGAACCATCTTAAAATAACACATTCTGGGTTGACGGCTGTTCCTAATTTGACAACGATTGAAGTTGGACAAACATCAAGGAAAAAAATGCTACAAACGATATCCTTCACTCACAATGAAATTGACCATTTATCTCCATCGATGTTCTATGGCATCAAATTCAATATCTATAAGTTAGAA…	FYRFLTNISLTSINSGDFTNMSKLKALTMEDMRKLESIKENAFDQLPTLDILQIENSPKLKTIEDGAFGILPQLNHLKITHSGLTAVPNLTTIEVGQTSRKKMLQTISFTHNEIDHLSPSMFYGIKFNIYKLELEFNRITEIPAYTFGGLTVTNLDLSNNPLEKVNDDSFSGIDEDSLDTIDLSYTKIDMLPITGLKKIKTLILEETPRLMQFPSVFVFENIEEARLHYFSHCCAFKYETQTDTPDDSKYGNKTDDIRGCSTTSEPASIGFSEQTKSRTSPVFYDGTTTMFPVDFDPFDPSGPFDPSGPFDPSGPXXXXXXXXXXXXXXXXXXXXXXAGSSFGFEPLPINPNTTHNHIGSKCNELAKKNYSQVICSPMPNAFNPCSDVMGYVFLRVLVW…
GRL101-like	NEW	Trinity	GCTACATCAATAGTGTGGCTAGCGTTTTTAGTGGCAAGCAGTTGTGAGTCTCATGGTTCAGTGGTCGCCTGCAACCCCACAACAGAAGTAAAGTGTGACGCGGGCGGATGCGTTGCCCTGAACTCGACCTGCAACTCAATCAGTGACTGCCCCGACGGATCCGACGAAAGCCCTCGCGTTTGTGGCTGTCTACCTGCTGAGTTTATGTGCTCTAATTCTTGTATTAGTATATACCGACGATGTGATGGAATTTGTGATTGTGGGGTTTCATGTGAAGATGAAGATGACTGTGACCAGTACCCGTGCCCAAGTACTCACATGAAGTGCGCCACTACACATGTATGCATTCACCTAGCTCTGCAGTGTGATTTTAATGACGACTGTGGCGATGGCTCGGAC…	ATSIVWLAFLVASSCESHGSVVACNPTTEVKCDAGGCVALNSTCNSISDCPDGSDESPRVCGCLPAEFMCSNSCISIYRRCDGICDCGVSCEDEDDCDQYPCPSTHMKCATTHVCIHLALQCDFNDDCGDGSDENCEHRSCYNLEFRCANGECLKPGYRCNGEVNCRGDDKSDEENCSEVVVCDGRRIFREHFCDFYAECSLSEKDEKQDCPCDPTEAFMCSTGRCFKRSRLCDGKCDCLGSCEDEDNCGSSVCVPGEDYFCSQSFRCLDAEFLCDSTNDCENKDDELCSSLYQSKDGYECKSENEGENMCHIGNKPYCYPTNYYCDYHPQCQGDSDRSYCKENAVCSSNEYACANGMCIKGSFRRXXXXXXXXXXXXXXXXXXXXXXXXXXXXXXXXX…

## Sheet: Apostichopus
Apostichopus japonicus
Name	Genbank identifier	Method	CDS	Protein
ILGF-1	PIK53467.1 corrected	Artemis	ATGCAGCTGGTATATAATAGTGCAGTGTGTTACCTTGCCTTATTGGCATTTATTGTGTCATCCGCCGATGGTTCTGGCCAAAGGTACTGTGGCGAAGCTCTTCTCGAAGCAATGGCATACGTCTGTGGTGATCGAGGGTACTTTGGGGTGACGTCAGGAATACGTGGTAGATCTGTGTCAAGATCTCCATTTTTGACAGAAGAAAGAGCCAACTCTTTTCTCACGAATGAGAGGACGAGAAAGACACGAAGAACAGGTCGGATCGTGACCGAGTGTTGTGACAATCCGTGCAGTCAGAGAAACCTGGAATCGTACTGTAACGTCGCTACCACGCAAACGACAGAGATTCCGACAGAACTCACTACCGAAGGGACTACCACAGAACCCGCGGCATCCCCT…	MQLVYNSAVCYLALLAFIVSSADGSGQRYCGEALLEAMAYVCGDRGYFGVTSGIRGRSVSRSPFLTEERANSFLTNERTRKTRRTGRIVTECCDNPCSQRNLESYCNVATTQTTEIPTELTTEGTTTEPAASPRRNSRNIEADGTAAAAGGGSGQGNGRGKGKGRHGKGNRREQDQTVDVTSAETEGNTEPPRPNQQENNEDNRGTPDQSEERPRDRCRGSKKKGKCRNQDRVEEEPTQDRIEEEPTTSREVSSTDGLSRERGSGSGGGRNRGNGKGKGKGSQRREQSEELTVETTTGCASQDGQNCEESNANAGGASRRPGKTGKGKGNGRRDDADISSSERNTGDIEEEGTVPTSGNRPSSRESSQSNGKGGGKKKLSKAEKKRQRKLLRKQEKADR…
ILGF-2	partial PIK53471.1	Trinity	ATGGACGTAAAAGTCTTGTTTTGCTATTTCAATATCTACACGTTATACCTCCTGCACCCCATCATGGCAGCACAACGGTACTGCGGCACTAATCTAGCCGACGCTCTCCGGATCGTTTGCGCGGATAGAGGCTACTATACCCAAAAGGGTGCTTTCCCTCCTGTGATACCTCGACAAAGAGCGTCCTCTTTTTTAACAACTGATTCGGAAAACCATCATCCTCGTAGGTTACGCCGTGGAACTGGAATCGTTACGGAGTGTTGTGAAAAAGCGTGTGATAGAGAAGTACTAGAAACCTATTGTAACCCCCACGTTACACCTACGTTAGCTTTGGCATCTCTTGTGACGTCACTGATGACAAAATCTCCCACACCACCGTCCTCTGAGCCTAGCAGCAGC…	MDVKVLFCYFNIYTLYLLHPIMAAQRYCGTNLADALRIVCADRGYYTQKGAFPPVIPRQRASSFLTTDSENHHPRRLRRGTGIVTECCEKACDREVLETYCNPHVTPTLALASLVTSLMTKSPTPPSSEPSSSSSSSSSSRNEDKFPMTDNALGEDYEGPTNEGPLTSGEPTPTENRISNGPRGPSSNASSLELPTRTSTATTNSSRIVTEGAHLAESSDQSSLEDTDSESEAPTKGASHERTRKKQKKQRTRPPKKPKKLSRERKERKKKKEKERRERQRTISKKLRNEERAAGLNPTEQQEDGGGGGGGGGGGGGGGEPRNNSNSDQPRNNRGKVNESQRHPNVAQEMNPLDKITKRILASIHDIEMNREADID
Octinsulin	MF401996.2	Artemis & Trinity	ATGGCTAAGTTGGGTTTGGCCCCATCTGGAGGTAAACCATGGTTTTCGACAGGATCAACTGTACTTTTCCTTGTGGCGGGCTTGTCATTCTTTTACGTAGCAGCAGAAGGGTCTTGGTATTGCGGCAGTGCACCCGAGACAGTTCGAGCTATATGCGATGGATGTTACGCAGGTGGAATTCACACTAGGGCGTTTAAGAGATCATCATCAGATATAATATCATTGTACAAAGATCCATTCCTTAAAAAATCGAATGCCTTGAACTTCTTACTCCCACGAAGTCATACCCCTTCCAGTTTGATAAAACGAGGGATCAGAAGATCCGGCTTTATCGGGGAGTGTTGTGAGAAGAATTGCGAAATACGAGAAATGGTATTTTACTGCTGTGCCGAGAAACAA…	MAKLGLAPSGGKPWFSTGSTVLFLVAGLSFFYVAAEGSWYCGSAPETVRAICDGCYAGGIHTRAFKRSSSDIISLYKDPFLKKSNALNFLLPRSHTPSSLIKRGIRRSGFIGECCEKNCEIREMVFYCCAEKQREYASFFPEIFRNRIRHT
Dilp7 ortholog	New	Artemis	ATGGGAGGGCAACTATTGGCGAATGTTTTGTTGCCGGTATTTGCAATCGTTGTTCTTCAATGGGATTATACGACAGGAACTCTACCTGCGGAAACACTACAGGAACTGAATTCCAGAACGCAACCTTCGTGGGAACAGTTATGGATTGTGGAAAATGTACCGACCGTTGACTGCACGGTGGATGCTGTACAGCTTCATATAATAGCGTGTAGTAATGACGTGTACAAAGATCATGAAGGTAGTCGCAGGCGACGCTTCAGTGATAAAAGAAGGCGATCCATCTTCCTAAACTTCAGTGAAGCAAACAATTTTCTTGCCAAGACGAAGCGTACGCATAGTAGGGTGCGACGAACAACTACTTTCTCAACAGAATGCTGCGATAAATTATGTATTTGGGAA…	MGGQLLANVLLPVFAIVVLQWDYTTGTLPAETLQELNSRTQPSWEQLWIVENVPTVDCTVDAVQLHIIACSNDVYKDHEGSRRRRFSDKRRRSIFLNFSEANNFLAKTKRTHSRVRRTTTFSTECCDKLCIWEEVGEYCWHSRVYH
GSS-1	New	Artemis	ATGACGACCAAATCCACAACAGTCATAATATTAAGGATCTTCTGTGTGTTGATAGCAGTAAGAGAAGCCGCATCAATAAGGTTATGTGGGCCGGACTTATCCAGGGCTGTTTATCAAATCTGTTCACATGGTAAACGAGGCTACATACCACCAACATTTAACTCAGAAGATGACCAGTTAAACCAAGAGTTCGGAACAGATTTGGAGGAGTACTTGGCTGAGACTATTAAAGAATATTTGAAACCAAATTCGTTGTACGATGATGTAGAACGGGAACTTTATCCTTCGTTACCAAGGGGCTTTAGACGGGTGACCAGAACGGGTGGGATCGCTAGAAGATGTTGTTCGACTGGTTGTAGCTCTTCCGATATCGCCAAATTGTGCTAA	MTTKSTTVIILRIFCVLIAVREAASIRLCGPDLSRAVYQICSHGKRGYIPPTFNSEDDQLNQEFGTDLEEYLAETIKEYLKPNSLYDDVERELYPSLPRGFRRVTRTGGIARRCCSTGCSSSDIAKLC
GSS-2	New	Artemis	ATGGCAATTGTCTCTACCAACGCATTGTTGTCTTCAATGCTTCTAGTCGCCTCTTTCAGCGCAGTTTCTGCTTGGTCACATCAAAGGCTATGCGGTCCAGATCTTGTCCATGCTCTGTCGTTGGTATGTGGTGAACGTGGCTACTTTGGAGGGTCGCGGTTAGTCGAGCGAGATGTTCAAGATGATGGCCTCGACGAAGAAATAACCACTTTGGTTGTGGGTGCAGAAAGAACATCGATTCTCGAATGTTTGAAAGCATGGAGTCCCTTTCCTCGCAGGAGAACTCGTGGGATAGTCGAAGAATGCTGTTTTCGAAGATGCACATGGGAGAACCTTGAAAGCTATTGCTCTAAGACCACTGCTTATAAAAAAGCTGATAACATGATC	MAIVSTNALLSSMLLVASFSAVSAWSHQRLCGPDLVHALSLVCGERGYFGGSRLVERDVQDDGLDEEITTLVVGAERTSILECLKAWSPFPRRRTRGIVEECCFRRCTWENLESYCSKTTAYKKADNMI
Insulin RTK	Improved upon PIK45733.1 and PIK45734.1	trinity	ATGGAGGATTATCACGGATACAGTACTTATACAATTCTAAGAACATCATGTCTGTTGTTGACGACACTTCTCCTGGTTAGCCTTCATGCTGAAGCAGAGTTTGCGATTGCTCCTCCGCCGGAAGGATCCAATACCTTTTCCATCAGAGACGATGTGTGCATCGGAGATATTGATGTTCGAAACGATCCCAGAAATCTCGAGTTTCTAGACAATTGCAGAGTGATCGAGGGTTCCTTATCGTTCGTGTTAATCGATCATGCCGACCCAAAAGACTACCAGGATCTGTCGTATCCGAAACTCCGAGAGATAACAGGTTTCTTTCTCGCGTACCGGGTCACAAACTTGACTTCGTTTTCGCAGCTATTTCCCAACTTGGCAGTGATCGGAGGAGAGAAGTTG…	MEDYHGYSTYTILRTSCLLLTTLLLVSLHAEAEFAIAPPPEGSNTFSIRDDVCIGDIDVRNDPRNLEFLDNCRVIEGSLSFVLIDHADPKDYQDLSYPKLREITGFFLAYRVTNLTSFSQLFPNLAVIGGEKLMFNYALVIYEMYALETIGLKSLTRISRGAIRIEKNFKLCYIDTIDWDSIMNIEDKENNIVTENKRVSECANHCPGMEKQRCRKMLPHGSVKALCWSNEDCQRICSAACPHSCHTQKPDTCCHPECLGGCSGNSATHCVACKNFISNGTCVGSCPSGTVQIMNRYCILPDECPSHYKLFQGVCSEDCPTGYTNHTTDARSCAPCLGTCPKTCDKATVQSLTDMMDLEGCTIIDGSLTITLQGGENTAKKLETYLGLIEEIRGALVII…
GonadulinR-like	Improved upon PIK39436.1	trinity	ATGTTGACTAGGACTGGCAAGTGGATTTTACTCTCTGTTACGATGATTGCCTTGACGAGTCCTTGTTGGGCGTTCGAATGTCCAAAGGGTGAATTCGTATGCGGTAACCTGACCAAATGCGTGAAGCAGAAATACCAATGTAACGAGATAGATGACTGTGGGAACAACGCTGATGAGGAGGAAGAAGTGTGTAGAAATTTCGAAGGTTGGGTAAAATCTATGGACAAAGTGTTCGATGAAAAGGATAATATAGAAAGAGAGTGTGAGCTCACAAACTATCCGCCTGTATGCGACTGTGTGAACGGAGAAAAACTGATCTGTAGTAACAAGGGGCTTACAGAAGTCCCAAGCGTTCCTCCAAATACCAGTCACTTAATTTTGATGAATAATCAAATCCAC…	MLTRTGKWILLSVTMIALTSPCWAFECPKGEFVCGNLTKCVKQKYQCNEIDDCGNNADEEEEVCRNFEGWVKSMDKVFDEKDNIERECELTNYPPVCDCVNGEKLICSNKGLTEVPSVPPNTSHLILMNNQIHDIPLTAFEGLTNLKVLYLSENPISTLRAGVFRDLINLEWLFLVNNTLRSLDDDAFIGLRKVYWLRLNSNLLEDLSDGTPFRHMQELKWCDLGSNKITKITSGTFQGETGLQTLDLSNNKIHTISKGAFLGQDNLTVLNLTLNNLSSVPKGLSSELPMLTTLSLSFNPIQLDELSFSGFHNLKEIDLVGVDIPNINNAMFEQINSLTILHFERFEYCKFAHHVRNCNPKTDGISSTENLLEGAILRISVWTIALLTTCGNLNVFISR…
Dilp7R-like	Improved upon PIK39927.1	trinity	ATGAAAACGATGGCACTCATCTGTCATAAGATACTACAGGTATTAATCGCTGCACTATTTCTCGGGGTCACGTTTGCCGGTAAAGAAGTTGACCAATCTGTGGAGCTGCATCGGGTCCGACGGCAGTCCTCCTCTGACGTACACGGCCATTGCCAAGTTACGGAATTTCCCTGCGGTAACTCAACGGAGTGCGTCCTGCAAAGTAAACACTGCGACTCCGTGGTTGACTGTGCGAACGGAGCGGACGAGGATGAAGAGGATTGCGATGACATGGACAATACCAACAACTTTGACTTTCTCTTTGGGAAAAAAGAAGATTCCGAGGAAAGACCACCTCCAGTAACCTGCACTGACACCATCTTTCCAGATGAGTGTGAGTGTTTTGTAGTCTTCGACGAA…	MKTMALICHKILQVLIAALFLGVTFAGKEVDQSVELHRVRRQSSSDVHGHCQVTEFPCGNSTECVLQSKHCDSVVDCANGADEDEEDCDDMDNTNNFDFLFGKKEDSEERPPPVTCTDTIFPDECECFVVFDEESGLENDEPIGLQLDCQLSELESVPDNLPRDTVYLNLAGNSLSNITVETFKTLTKLRRLDLQSNRIGSLHPDSFRQLRSLELLDLSNNRISSLSKEYFLFNGILKELLLKHNPIQRLEDAELFINLQMLETLDFFGAQISELRTGVFSPLENLRKLVLAHNEIEALTQGNMEGLRNLLELDLQNNEVSFIEDGTFKEMPMLNELRLHGNKIHEVKQGMFEDLANLTILLLDQNLIHTIEPGSFSKLFKLQHITMSNNMLTHLTVGM…
BursiconR-like	improved upon PIK52319.1	trinity	ATGGCAATTACAGAGTTCATATTGATCTTGTTTTTTTCTTTGGTTTCCAGCCAAATAGTCAACCAGTACAAATGGGTAAACTGCATGCATGATTATGATATTTGCATCATTTGTGAATGCCGTTGCAAAGACGCATCTCAGCAATTGTCTATCTCATGTGAAAATAGGTCAATTTCATCGCTGAACGACGGTCTCATCTCGTCGATAGAGGAATTAAAGAGTAACTTAACATTTTTGGATTTCTCTCACAACAAGCTCACCAAAATTCCACCGAAATCCTTCAAAGGTCTCAACAATGTCAAAGAACTTGGTCTGAGTTACAATGAGCTAGAAGTTCTTCATAAGAATTCTTTTGCTGGGCTCTCAAGTGTTTCATCTATAATTCTTGATAAGAATAAA…	MAITEFILILFFSLVSSQIVNQYKWVNCMHDYDICIICECRCKDASQQLSISCENRSISSLNDGLISSIEELKSNLTFLDFSHNKLTKIPPKSFKGLNNVKELGLSYNELEVLHKNSFAGLSSVSSIILDKNKFKEFPIEAFLHKDLKHLANIFMDSCYLSLVPGIEFSGLQHLETLSLEDNSLITIPYAALSHLTHLRELKLSMNLITEIQPFTFKNNSFLQTLSLSHNGISFIPNNAFAGSRHLTELELDGNPIANIGLRAFNSLPALKYIKMSGVTNLRTLPDLTGTVHVEEITFHSCNITSIPEDFCTTMGDLAKLDLYRNHLETIPTFIGCTNLVTLNFGFNKIVDVANSSFIGPDCLLDLVLKYNEITYIHQLAFHGLHCLENLDLSGNKITA…
GPA2/GPB5R-like	improved upon PIK52122.1	trinity	ATGGTCGAATGTAGAGGATCAATCTTTCCATCTTTGAAAGACATCAATTTACCAACAAACACAGAAATATTGGATATTCAATTGACTGAAATCAGAGAGATTGGAGCGACGGACCTTCAAGTATTTTCCAATCTACGTTCAATTAAGATCAAAGAAGCCCATAAGCTGGAGAAAATTGAACCAGGAGCGTTTGACAATTTGAGACATTTGGAGCTGGTGAGCATAACTAATACGTCCAGTCTCTTCGAAATCGAATACGGTGTGTTTGGATACCTGCCAGGATTGAAGAAACTTGAGTTATCTTACGGGGAGCTGAACAAATGTCCAAACTTAACGTCACTACGAACGGAGTCAATCACCCCACCAGATATCAATTTGGTTCACAACAAAATTTCTTTG…	MVECRGSIFPSLKDINLPTNTEILDIQLTEIREIGATDLQVFSNLRSIKIKEAHKLEKIEPGAFDNLRHLELVSITNTSSLFEIEYGVFGYLPGLKKLELSYGELNKCPNLTSLRTESITPPDINLVHNKISLVTPYQFTGMKMLHLNLDNNRLERIPDYAFANSQIVTLSLSKNPLSFLHDLAFTDILDIKEVLLSDTNIAHLPTEGLKYIITLDIQNTPRLTKFPSIFRFESIQVARLHYFSHCCAFSYNTSENYKMAKDLKIGDPLNVTCPSPSSLPPTPETGTDTNGIIFDDPRYNGYPPEVFDHDGFGKFRDEYDNPFSPDRGPYIDAPAPFHPNDTFAVLTNPPHHKPPINPGGFFDQTIDPAVDHKFVGGSCNDFVPKDYSKVICSPKPDSF…
GRL101-like	improved upon PIK37947.1	trinity	ATGATGAGAATACTCCAGAGTGTCGTTTTCCTGGCGCTATTGCTTCTTATGGTCGTGAACATAAGCCAATCATCGCCACCCGACTGTGAAGAGACTGATATTTTCTGTGACAATAAATGTTTGAATGTAACAATGCAATGTAACAACGTTTATGACTGTGTTGGAGGTGAAGACGAAAGTTTCTTGATTTGCGGTTGTCGGCACGATGAATTTACATGCTCAGACGGATGTATACCACTTCACGAGCGATGCGATTTGAATTGTTCGTGTTCAAGCTGTGAAGATGAAGACGAGTGCGAGGGGTATTCATGTCCCCCAACGCACAACAAATGTAAAAATCACTACTGCATTCCTCAAATTAATTTTTGTGATTTCATCGACGATTGTGGTGATAACTCG…	MMRILQSVVFLALLLLMVVNISQSSPPDCEETDIFCDNKCLNVTMQCNNVYDCVGGEDESFLICGCRHDEFTCSDGCIPLHERCDLNCSCSSCEDEDECEGYSCPPTHNKCKNHYCIPQINFCDFIDDCGDNSDEENCNHPPCSSMFLFECENHQCISNAYACDGIEDCFDGSDERHCEEENFHICEDGNKIHEGRKCNMVRDCPSGSDEHGCECQVYQTQCPAEKSCFDNDIHCNSFCECADCSDETNCDEICDVSNGIYCPWMNYYIGSYRLSGCVKTERFCDGTPDCLGYQDEMFCSVPLHVPVRQCPSTRDPRYIPESEFCDNSSYCFQGSEETNCTHGERVCSVGQFQCADSSCVEESLRCNGFWDCKDFSDEIDCPNYICPNENMFKCRGTGQ…

## Sheet: Asterias
Asterias rubens
Name	Genbank identifier	Method	CDS	Protein
ILGF-1	XP_033628588.1		ATGTTCAGAAACACATCGACAATGAGGGCGCTTCTCCTACTTGACGTCATTTTCGTTGCCTTGGTTCTACCAATCACGGCATGGCCGAAGATCTGCGGAGAGCAACTGGTGGAGACAGTGTCTCTAGTTTGCAGTACACGAGGTTTCTACAGCCATAGAGATTCAAAACGAGATGTTGAGGTTTTCCAGAATGAACGAGCGGCTAAGAGCTTCCTTGGTTCCCGCATCGGCTCGAGGCAGCGACGGCGGACGGGTAGAATCGCCACGGAGTGCTGCGACAGAATATGTAGCTTCGACATCGTGGAGAGTTACTGTAACCCTTGGCCCGTGGCGATAGAGTCGCGAGACCCGCCTCTATCTCCCGTCGCACCGGGCAGGGTACGGGAAGATAAATCTGCG…	MFRNTSTMRALLLLDVIFVALVLPITAWPKICGEQLVETVSLVCSTRGFYSHRDSKRDVEVFQNERAAKSFLGSRIGSRQRRRTGRIATECCDRICSFDIVESYCNPWPVAIESRDPPLSPVAPGRVREDKSADVDYMYNPDVVDVEEANSVIQREEDLIDDIETQDQEIEQDEEQNMQTLPEEDAEDTDIREPEDVEESFPVPVPTKKRRKVEGRRSKESKNKGGKSEGKNKKRSGSREGGRSSRRSRGKSSRSKKQRDGRERSKRWEGLDTSHPVKEPTARSVLGRVDTRPFRNFLYNRYTVDEKRDTERESYRAVAPLTGYNSHRGGSQPDNHPTLAALYNLAVKLAKGLQH-
ILGF-2	XP_033629286.1		ATGAACCAATATCAGCTGATAGTACTATTCGAAGTGTTGGCTCACGCCTCTATGCTAAACTATGCCTCTCCAGTCCAGCTGTGTGGAAGGGAGTTAACGGAGACGCTTAGGTCAATCTGTGGTGATAGAGGTTACTATTCACCTGGACAAAGTTTTTCACGTCGAGCGCCGACACACGACGGCATTGCGACAAGATGTTGCCAGTCCCTTTGCGAGTCTTCAATCCTCGAGACCTACTGCAATCTACCAGCACCGCCATCGCAAACACAACCATCCACAGCAGCCCCAACAACAACAACAAAAATGGCGCCATTAACAGAAGACCGACGGACGAAAGATGTGGTCGTCGACTACTCAGACCAGCTAGCCACCGAAGGCTCCCAAATGTCGCGTGTGGAC…	MNQYQLIVLFEVLAHASMLNYASPVQLCGRELTETLRSICGDRGYYSPGQSFSRRAPTHDGIATRCCQSLCESSILETYCNLPAPPSQTQPSTAAPTTTTKMAPLTEDRRTKDVVVDYSDQLATEGSQMSRVDGVLTHDTVTNRSKTTTESNEGSYDNEEGAPYDKPDDSSPSERGESIQDEDNEVNKPEPNNIRDNSKERGRNRTHKGVSSERRANNSRRRGLSSERRGSSSSRREEKLRRRRQRHRERELREQRKQSNSKRKSKGDKKDHSVAATTPLAVQERPLKNGGRNSTSGEHSSVNGTETDTAGAGSPEVKKDDLITTITAVLSDMIGFQPDNGNR-
Octinsulin	XP_033629354.1, corrected		ATGACGCAATCTTCAAGAGGCAATTTACGCCTGACCCTACCACAAGCCCGTCAAGCCACAGCTCTATCCATTGTGTTTTGTCTGTGTTTCTGGTACGCTAGTGCCAACAACAGTTGGTATTGTTCTGATGTATACAGCACCTTGCAGTCCCTCTGCGACAGTTGTTATGCTGGATATGCAAAGAGATCCGACCAACAAACCAAAACAATTGATCCTTTTATGGATCGTAAAACAGCCGTGGATTTCTTCAAGCGCGGAACGTCACGAGGAGGCGCTCGTGGGGGTATCATCGATGAGTGTTGTCTGAAACGCTGCACGACCAATGAGTTGATGTTGTACTGTTGCGAGGAGAAACAGAGGGAGTACTTCTCATTTGTTGGATGGCTATCACGGAGATAA	MTQSSRGNLRLTLPQARQATALSIVFCLCFWYASANNSWYCSDVYSTLQSLCDSCYAGYAKRSDQQTKTIDPFMDRKTAVDFFKRGTSRGGARGGIIDECCLKRCTTNELMLYCCEEKQREYFSFVGWLSRR-
Dilp7 ortholog	XP_033629466.1		ATGGAGCGCCTAATCAGCATTCACATCAAGCTTTTGGCGCTCATTTTACTCTTTCTCCTACCGTGCCTCCGCGCCGCTAAGCCGCATCTGCCTGTGGACCAGTGGAGATCGAGGAGTAAAGCTGATTGGATACGATTATGGAACACAGAGCGACACGTTAATGTATGTAACGAACATCTTCAGCCTGTCTTTGATGCGGCCTGTCAGAATGATGTACGCAAGATCACGAAAAGAACCGGAGAAGAATTTGTAAAAGAATGGGCAGCCAAGGACTTTTTGATCGGAAGTAAGAGGAAACGTGGCTTGAATGAGGAATGTTGCCATGAGGATACGGGGTGTGTTTGGGAGGAGGTGGCCGAGTACTGCAAGAAGCATGGTAGAGAGAAGCATAAGCCGGGA…	MERLISIHIKLLALILLFLLPCLRAAKPHLPVDQWRSRSKADWIRLWNTERHVNVCNEHLQPVFDAACQNDVRKITKRTGEEFVKEWAAKDFLIGSKRKRGLNEECCHEDTGCVWEEVAEYCKKHGREKHKPGSTVAQGKQGR-
GSS-1	ALJ99970.1		ATGGCAAACTACCGTCTCATCCTCGAGGCCACCTGTCTCCTTGTCCTCCTTATAAACACCGCCCTCTACGCCGAGGCTGCTGAAAAATACTGCGATGAGGATTTCCACATGGCCGTCTACAGAACGTGTACAGAGCACAAGCGCAGTGGGAGATCCGCCTTCAGCTTGAACGACTTTTTCCGAAGTAACTCAAAACGGACCGCTGGATCTCCCCGACCAGACGACGACTTTTTCCTGACTATGCAGAAGAGACCTGAGACTTACGTTGGAATGGGATCCTACTGCTGTTTGGTGGGGTGCACACGTGACCAACTATCACAAGTCTGCTAA	MANYRLILEATCLLVLLINTALYAEAAEKYCDEDFHMAVYRTCTEHKRSGRSAFSLNDFFRSNSKRTAGSPRPDDDFFLTMQKRPETYVGMGSYCCLVGCTRDQLSQVC-
GSS-2	XP_033633574.1		ATGACATCGTGCAGCCACCAAATGCTGGCCTTGCTGTCAGCCGTTTATATTTTGATCTTCTTCCTTGGGGGTCTACCAGCCGTCCACGCCAGAAGTGATCATGCGAGTGTCAAGCACTTCTGTGGATTGGAATTCTCCTACGCTGTGGTGACGGCTTGTGGGGAGGCTAAACGATCAATACGCTCGGCGCCCTTTTTTGACATGTTTCCAGTTTTCAAATCTCCAGAACGGATACCAGCCGACTTCGACGATTCAAGCATGATCCATGTGCGAAAGAGGCAGGATTACCAGGGAATGGCTACCTATTGCTGTACCAACGGATGCACCATTAGTCAACTAACCAACTCAGGAATTTGCTGA	MTSCSHQMLALLSAVYILIFFLGGLPAVHARSDHASVKHFCGLEFSYAVVTACGEAKRSIRSAPFFDMFPVFKSPERIPADFDDSSMIHVRKRQDYQGMATYCCTNGCTISQLTNSGIC-
multinsulin-1	XP_033641594.1, corrected	Trinity	ATGAACCGTATTCTGCTTGCTGTATTGGTCTTTGCTGTGGTTTGCCAGGTTTCTGGTGAACTCAGATCTCAAGATGGTCTGATGAGAGAAGTGCGCCAGGCGCTGGCTCGCAATGGACGCCATTTCCGAGCAGCAGAAGATCACATTTACTGTGGAGTAGTACTGGAGCAAAATAGAGAGTCAGTATGTGGAGTAATTCCAGGATCAAAAAGAAATTTGTTCGTCAGGAAAGAAGCAGCTAGTGAATTTTTAGAGAGGGGTGTCCAAGGCTTAGCCGAGGAATGCTGTGGAGAAGGTTGTACCATCGAAGAAATCAGTGAGAGCTGTTAA	MNRILLAVLVFAVVCQVSGELRSQDGLMREVRQALARNGRHFRAAEDHIYCGVVLEQNRESVCGVIPGSKRNLFVRKEAASEFLERGVQGLAEECCGEGCTIEEISESC-
multinsulin-2	XP_033641239.1		ATGACTCGTATTCTACTCCTTGCAGCTGTGGCACTTGTCGTGGTCTACCAGGTGTCCGGAGCACCAAACCACAATGGCTTGTTGAGAGAAGCAAAAAGGAACATATTGGGTAGGCGTGGTCACCAATCAAGGTGGGATGAGACGCATTTTTATTGCGATGATGCACTGGAACAGCAGAGGGAAGTGATTTGCGACCCTAACCACACTCATGCTCCAGTTCAACCTACACCAACTGGTGGACCACTTCCACCTACAGTATCACCTGGACACCAAGATGCGTTCGTGGGGAAGAATGAGGCGAGTAGGTTCTTGGGTCGTGGAGTGGTCCAGGGCTTGATTGAGGAATGCTGTTTCGAGGGGTGCCACAGCGAGGAGATTCATGAACACTGCCCATAG	MTRILLLAAVALVVVYQVSGAPNHNGLLREAKRNILGRRGHQSRWDETHFYCDDALEQQREVICDPNHTHAPVQPTPTGGPLPPTVSPGHQDAFVGKNEASRFLGRGVVQGLIEECCFEGCHSEEIHEHCP
multinsulin-3	XP_033625287.1		ATGAATCGCTGTATCGCTGCGTTGCTACTGCTCAGCATTTGTCTGGTAGTCAGCATTTCTGGCACTGAACTTAATGTCGCATCTTGTCAGCAGCTTGCCGATCAGGTTAAGAGCGAGGGTAAGAAGCGATGGGATGGACCCTCACACAAATTCTGTGGTGAGACATTGAATGAAAAGAGGTATGCGTACTGTACATGCGGACTTGTACCGAGGAAGAGGGAGCTCGAACTGTCAGAGTTCCTGAACCGTGGCAAAGCAAACGGCTTTTTGTCCGCGCGTAACGTCCAGAAACGAAGCCTTTCCGAAGAATGCTGTCACGAAGGTTGCTACTGGGAAGAGATTGAAGAAGTATGCTAA	MNRCIAALLLLSICLVVSISGTELNVASCQQLADQVKSEGKKRWDGPSHKFCGETLNEKRYAYCTCGLVPRKRELELSEFLNRGKANGFLSARNVQKRSLSEECCHEGCYWEEIEEVC-
multinsulin-4	XP_033625191.1		ATGGCTCGTGTGCTGCTTTTCACTGCTTTGGCTCTTGCTATCGTCTGCCAAGTGTATGGCAAGCTTAACCTGAAGCCAGAGGAGACCATTGACGTTACATCATCTGAGCACTGCGGTTTTGTGAAGGAGTTTCGACAGGTGTTATCGGACAATCCCACTCTAATGAAACGCTCTCCCCGAAACTATTGGTGCAGTTCCACCCTGGAGCGAAGAAAGGAGGCACTATGCAGCTGCCCTTGGCATACCCTTAGAGACGATGATTTCATGGAGGAGAAGAAAGACGCAACTAATTTCTTGGAGAGGGGGGTTGAGAAGAGGAGTCTGCATGAAGAATGTTGCAACGAAGGATGCTACTACGAAGAAGTTTACGAACTCTGCTAA	MARVLLFTALALAIVCQVYGKLNLKPEETIDVTSSEHCGFVKEFRQVLSDNPTLMKRSPRNYWCSSTLERRKEALCSCPWHTLRDDDFMEEKKDATNFLERGVEKRSLHEECCNEGCYYEEVYELC-
Insulin RTK	Improved upon XP_033634340.1 and XP_033634341.1	Trinity	ATGTATTTGATGACTTCAAAGGACGTACCTGTGGGGTACCTCATTTGGACTCTGTTCATGGTGCTCTTTGTCACAAGAAAAGCTACTGGTGCTGAAGAGATTTGTGGAAATATTGACATTCGCAACAGTGCTGAATCTTTCACCATTCTACAAAACTGTACAATCATCGAAGGTGACCTTCACATTCTTCTTATTGAGAGGGAGCAACCAGGCGTCTTGAACAGCCTTTCTTTCCCAAAGTTACGAGAGATCACCGGCTTCTTCGTCTTATACCGTGTCTCACATCTCCTGACCTTAAGAAACATGTTCCCGAATCTAGCGGTAATCCGTGGTGATACTCTCTTCTTTAACTATGCCTTAGTGGTGTATGAAATGCTTGAAATGCAAGAGATTGGCCTC…	MYLMTSKDVPVGYLIWTLFMVLFVTRKATGAEEICGNIDIRNSAESFTILQNCTIIEGDLHILLIEREQPGVLNSLSFPKLREITGFFVLYRVSHLLTLRNMFPNLAVIRGDTLFFNYALVVYEMLEMQEIGLPSLVTVMRGSIRLEKNPSLCYMDTVDWSLILQEGIENNFIADNKDQGGCFNFCPKKDNGRTCRRQSTLGMRELCWSSEHCQKVCPSRCQSACDESLTCCHESCIGGCDGPTDRDCIACRNLILNGRCIDRCPENTFVYQNRRCIQADKCPPKWKLHKGHCIMECPTSYITNITNSRFCQQCEGPCPKVCGYGTSIVNAVGHSETLAGCTVINGSLEIGIRSGTNIMKDLEKNLGMIEEVTEKIVIRMAHSLVSLNFFKRLKRIGGR…
GonadulinR-like	XP_033631990.1		ATGGAGATTAAAGAAAAGGACTCCGAAAACAAACAGATGGACCTGTCTTTGAATAATGATGCAAAGAAGGCACCGCTCCGGCTACCCTTAGAGTCTCGTAACATGAACAGCAGATATTCCCGATGTAATTCATTCCAAGCCGAGTGTCGTTCTCTGGGTAAACGATGTAAGCTGGCGTTGGTGGCAGTTGTTGTTATATTCCTCTTGGTCATCATAATTGCTGTCCTTCTAACAGTTTTAGGTAGCGGGAGGGTCCAGCCATCAGAGGACGATGCTTATGCTGTGACAGTGTCAGCTGAATATGAAATGAATGGGAACGTTGGAGACTTCACCTGCCCGCAAGGAGAATTTCGATGCAACAATCTTACTCGCTGTGTTGCCCAACAATTCCAGTGCAAC…	MEIKEKDSENKQMDLSLNNDAKKAPLRLPLESRNMNSRYSRCNSFQAECRSLGKRCKLALVAVVVIFLLVIIIAVLLTVLGSGRVQPSEDDAYAVTVSAEYEMNGNVGDFTCPQGEFRCNNLTRCVAQQFQCNKIDDCGNNADEMECEHDEGWIKTFDEKIPIRVQPKREPSTECSLSGFPDVCICYENTSLKCVYANLTKVPPGISSNITHLNLRGNQIIFEDGVFEGYSNLQSLNLMDNGIIELPVDVFRGLRNLDKLYLSDNKIKFLIPGTFRYLNNVTWLFMSNNELAALGEGVFQGMDKLYWLMLPNNSISSLARSVAFRDTPSLVWFDISENPLGRLSPYNFSLPGNVSIISLLTINNCNISSIHRDTFRSFRGLSVLHLSHNSIKYFPSGLF…
Dilp7R-like	XP_033635728.1, changed slightly	Trinity	ATGACGTCACTACACGTAATTCTGTTGGTGTTCATCCTTACGCATGTCTGCTGTGGAATGAGATTGAAACATGAAGCCGTGCTGAGGAACCTACAACGACGTTCCATAGATGTTCACAGGCATTGCGGTGAAGAGTTTCCGTGTTTGAATTCGACGCAGTGCGTGCCTCAGGACGCTATCTGTGACGGGACGCCGGACTGCGACAACGGGTCTGATGAATGGGAAAAGGAGGAATGTAATGATTTCCACACGAATCAGTTGTGGGACGCAATGTTTGGTGAGAAAGATGATTGCGATGATTCAGAAGAAGATGATGACGATGATTGCGATGATGATGACTCAGCCAGTTATCAAAACGAGGCTGGCAACTTTCTAATCGAGGCTCCATGCGAGAACGGA…	MTSLHVILLVFILTHVCCGMRLKHEAVLRNLQRRSIDVHRHCGEEFPCLNSTQCVPQDAICDGTPDCDNGSDEWEKEECNDFHTNQLWDAMFGEKDDCDDSEEDDDDDCDDDDSASYQNEAGNFLIEAPCENGTFPETCECIVELEKPSAAHRPVRFSTLPAESPTGPDDTSETPSYRSTSTTGTGTQSPVVEGTVIGVKIDCRASGLTSFPRNLPENTLFIDVSDNKITELARDDFANLTQLRILSLSRNKLRHIDDEVFNPLTELERLDMIACGLDEIPARFFASQSRLKYLKLAHNNLKTLARMSLIGLDSLVDLDVRGNQISDLEVGVFEHTPRLFTIHFSENRLSSIPASLLRPLWNLNWISFQRNDISNIEKGAFSTNEMLTTLMLADNKLTA…
BursiconR-like	XP_033646149.1, changed slightly	Trinity	ATGGAGTTAATCTTGATGTTGTTTTGGGCTGCAGTGTACGGGGTGATGCTGCCTGTTTTTCCTGCCACCCCAACGAAGTTTAACTGTCATAGAAACTCTTCTCTATGTTCGAGTGTATGTTGCTGTTACAGGCCGAAAAATCCCAACGGTGGGTCGGTGGACATCATAGCTGTGGACTGCACCCGGAGAAACCTCACTGAGGTCCCGCTAGATTTGCCAGCGAACACGGTCGAGATAAACTTGAGTTTCAACAATCTCACCGCACTCCCTGCAGATGCCTTTAGTCATGTAACCAGACTCCGCCATCTGAAATTAGTCGGTAACCGCATCCGGACTCTAAACGAAGACGTATTCCGAGGGCTCAAGGAGCTGCATTCACTTGATCTTCAGCTAAACATA…	MELILMLFWAAVYGVMLPVFPATPTKFNCHRNSSLCSSVCCCYRPKNPNGGSVDIIAVDCTRRNLTEVPLDLPANTVEINLSFNNLTALPADAFSHVTRLRHLKLVGNRIRTLNEDVFRGLKELHSLDLQLNIFQKLPSKAFHPDLANLRTLNLNSNYIEDFPGHALLNLHSLRHLYVEGNRLNRIPTEAISLVPELTVLLLSSNAITMVQDHAFQNNTKLIELSLNNNSIQVISTHAFSGLYNLKGLDFRYNYHRIKNIKQGAFRNLTNLNALAISDVDNLSEFPDLSGTTSLERLTIDRCSLTAIPTTFCDGMHHLKELDLHNNKIESIPSFSNCSQLQYLNLGLNKLSSLESTPFQGLNQLSHLYLGENNIERIRADSFEGLSAAYELDLGNNDII…
GPA2/GPB5R-like	Improved upon XP_033637176.1	Trinity	ATGGCGGTACACGGGGATGTACCAACCAAGAAGGCACTGTCTGTTTTCATCCTATATATCTGTGCACTCCACCCCATCATCAATGCCACGGAGCAACCATGGATTTCGGAAGTAGTGCCGAGTAAAGACGTGGTGGACTCAACTGATAAGTGGGGTACCTCCTACCCGACGGAGGCCGGCCTTGATGAGGGCTTCTCCTGCCCCGAGGCATGCGAGTGTGATTCTCTGGACAATACGCAAACTGTTGAATGTTCCGGAGATCAAATATATTCAGTGGATCAACTAAAGCTGTCCAACTACACCAAACATCTGTACCTCACGGAAACGAATATTGAGAGCCTGACAGCTACAGACTTTGTTAATTTGACGCTTCTTAATAGCATAATTCTCACAGAAAAT…	MAVHGDVPTKKALSVFILYICALHPIINATEQPWISEVVPSKDVVDSTDKWGTSYPTEAGLDEGFSCPEACECDSLDNTQTVECSGDQIYSVDQLKLSNYTKHLYLTETNIESLTATDFVNLTLLNSIILTENEKLRTIEQGTFDNLIEVTRIDVTHSPLLKNLDQGVFGYLPHLSSLSFEKCGLERIPNLTSLVNENSLKKLVFSDNKIYSLEPYSFSTFSFEIYTLTLSGNDISTVPGRVFAGAKITVLILSKNPISEVDDNMFDGIEGLREVYLSDTSISRLPTKGLKDITLLDIQGTPNLKHFPPLFRFQSISTAKLHYFSHCCAFYYNTTENTHMAKMHNITEAVEDVDCPTSTSQPVRSASPFEFLDNREASIPRGSREILDEYIQSAVVPPN…
GRL101-like	XP_033640434.1, changed slightly	Trinity	ATGAGACCTACACCTCTGCTGATCACCTTGACTCTACTCTGCTGTGCTGTGCAAACAGATGGGAGGCTACGCTATAAAGACGAGACAACTTCTTGCGAAAACGAAGACGATTTTGAATGTGAGCAAGGCATATGCATCGATCAAAGTCTCACGTGCAACTTGGCCTACGACTGCGAGTCTATGGCGGATGAGACAGTGCAACTATGTGGATGTCCAAACCCAGGAGAGTTCCGATGTCAGAATTCGTGCATCCCGTTGGAGAATCGCTGCAATGGAGACTGTGACTGCGACGGGGAATGCTCTGATGAAGTCCTATGTGCCAGCTTTGAGTGCTTGGAAGGATTTGTCAAGTGCGACAACCACTTATGTGTGTCCAAGTTCGACTGGTGCAACTTCTAT…	MRPTPLLITLTLLCCAVQTDGRLRYKDETTSCENEDDFECEQGICIDQSLTCNLAYDCESMADETVQLCGCPNPGEFRCQNSCIPLENRCNGDCDCDGECSDEVLCASFECLEGFVKCDNHLCVSKFDWCNFYDNCGDGSDEALCDRRQCWATEFTCDNQECLNSFYVCDGVEDCLDGSDEKQCSESDFADCGDGTRVHRHNFCDGHPDCVNNEADEVGCNCTDVTQFKCNIGKCIPSANVCNKMCDCLDCEDELDCEDCNLEDHIYCPFEKKPPTCLNKKFICNGVFDCEWPADEVGCPGSGAPMDCRVTCGEGDGRCLSVLRSVLEEQNMCMSPPDECQPHESRCKNGDCFNYTFRCDGVGDCYDGSDEENCESFECPEDKRKCAGGICIWENRWCD…

## Sheet: Florometra
Florometra serratissima
Name	Genbank identifier	Method	CDS	Protein
IGF	New	Trinity	ATGGGATTACTTACGTACTTGGCTTTTTTTGTGGTGCTGTTTTATGGAGTGCAGTTACGAAGCGTCGATTCTAAACCAAAATACGCACGTTACTGTGGCGCAAATCTTGCAAGTGAACTAGAGAGGAGGTGCCGGACGAGGGGGTACAACGGTCCAGAACAAAAAACACACTTATTATTTCAAGACAAAAAAGTTCAAAATATTGGCACAATACGCTCCAATGAAAGAGACATTATAGAAGCCTGCTGCCGTTCTCCTTGTACCGAAGAATTTCTTGATAGTTATTGTTTATCTTCAACACCTGTGGATGACACAACTGCGGAGATTGAAACTGTGGAAACAACTACAATCATTGGTAGTAAAAAACCACGTACTAAAAAACCAAAATCCGATCGAAGG…	MGLLTYLAFFVVLFYGVQLRSVDSKPKYARYCGANLASELERRCRTRGYNGPEQKTHLLFQDKKVQNIGTIRSNERDIIEACCRSPCTEEFLDSYCLSSTPVDDTTAEIETVETTTIIGSKKPRTKKPKSDRRKDGRKSKGGSDMSDDSASNRDYESQTETPRNKNGREKNKNKEGRNKEDRNKEDRNKCDKKTLTDKYGKPCTRKSKERKQKDRTTRKNRKRNKKNKPTRRPKRWDSETTTLSDFLLSQRFLQGVYDSDIGDQSTLDELAPRFDAVQEGDTSYSLSQESSSNEVISEAQRTEQFRPPFRPIPADTSEESYNNNMFMNAGNSRKGEPSLKDDPVAKLKKIKTYLHISGLMQDSTSSS-
Octinsulin	New	Trinity	ATGACCAAACTATTTTGTGGACAACATAAAAACATGGCAACGGCCAGCCTAGTTATCACCGCCATTGTCGTGCTACTTAGTCACGTGCAAGTTACAGAGGCCCGCGACTGGTATTGTGGTAATGCTGCTACTACATTAATGGACATTTGCCAGAGCTGTTATGCCACCAAACGAGGCTATTCAAGTTTACCTTCGTTAAAATCAAGAACAGATGGAATGTTTTTAACGAAGGAAAGAGCGTCTGGATACTTGGAGACTAAACGATCTAGGCTGTTTTCGTCAGTAAATTTAGATCGCCGTCAGCATGGACAAACGAACTTCGTCATGGAGTGTTGCTACAATCCATGTTCTCGATTCGAAATGATTAAGTACTGCTGTACATCCAGGCAACTAGAATTC…	MTKLFCGQHKNMATASLVITAIVVLLSHVQVTEARDWYCGNAATTLMDICQSCYATKRGYSSLPSLKSRTDGMFLTKERASGYLETKRSRLFSSVNLDRRQHGQTNFVMECCYNPCSRFEMIKYCCTSRQLEFNDTEGKK-
Dilp7 ortholog	New	Trinity	ATGGAAGTTTGTCGGCGGCGAACGTGGCTTGTTACGTGGACATGGCTGATGGCGGCGTTAGTTGGTTCTACTTATTCATTACAGGATTATTCGGATAGGTCTCATTATGACTGGGCACGGGTATGGACAGTAGAAAGTATGCGGCAATGTCACGAAGATTTAAGAGAGATGGTACATATTTCATGTCATAATGACCCAAGAAAAATTACTTCAAAAAGAAGCATTTTTATACCACGTAATGAAGCTACTGGATTTTTATCAAGATTTCTACGCACGCGGAGACCGTCCGAGCTCCACGAAGATTGTTGTCTAGATAGCAGGGGCTGTACATGGGAAGAAGTAGCAGAAATCGCATGCATCAACAACAGGAGACGAATACATAGACCAGGATCACCAGTC…	MEVCRRRTWLVTWTWLMAALVGSTYSLQDYSDRSHYDWARVWTVESMRQCHEDLREMVHISCHNDPRKITSKRSIFIPRNEATGFLSRFLRTRRPSELHEDCCLDSRGCTWEEVAEIACINNRRRIHRPGSPVGR-

## Sheet: Hemicentrotus
Hemicentrotus pulcherrimus
Name		Method	CDS	Protein
IGF-1	IACU01068342.1	NCBI	ATGGTTTGTTTTAGGTACACGGTAGCTCTCATATCTGTCATCCTATTGGCTCTTCTGCGTCACGTGACGACGTCCTTTCCGCTACTCTGTGGTCAAGAACTTGTCAAAGCTGTTGCAGCGGTGTGTAATGATCGCGGTTACTACGGTCAGCCAAGCAAAAGATCAGCGGGTATATTTGAGCTGGAGACGCGGGCAAAGACATTTCTAAAGTCCGGGATATCGAGAGGCGAGACTCGTCGGTCCAAGCGAGGATCAAGAACCGGTCTCATCGTAACAGAATGCTGTCTCAACCGATGTTCCGTCTCTCACCTAGAAAGTTATTGCAATCCATTGCAACCGGACGCAGTACACGATGCGGAGGTGCACATACGACTTGAAAAATCTGCTGAGGAAGATGCT…	MVCFRYTVALISVILLALLRHVTTSFPLLCGQELVKAVAAVCNDRGYYGQPSKRSAGIFELETRAKTFLKSGISRGETRRSKRGSRTGLIVTECCLNRCSVSHLESYCNPLQPDAVHDAEVHIRLEKSAEEDADETQGRPQDGPSQLDTATGTVPETDTSETRGRVRIDAVEKVLSERLIPTSTTGSSPSPSRKKPRKDKSERRNSSREAKQARREERRRNRERSSGGRSRSGRRKDKDNDRASRAKRHGLNMWRNMFSDKGFSNIPGIQNQLNLHQVNGRAPSSTTIDTFQMQTSSPTQQRNGGENFEQSSINQEADKKMRFSALMTKLRTMVLKFPRDR
IGF-2	NEW	Artemis corrected with IACU01057258.1	ATGGACCCGTTCAGGGTACTTCTTTATATGGTAACATTCCTGCTATATGTGGTGGGACCCATCTCATCATTTCGGCTCTGTGGGCGGGAGCTCGCCGATGCACTGGCTGTCGTCTGCAAAGGGCGAGGATACTATATCGACGATTCAGAGATCTCACAAAAAGATTCGCCGATTGTACCCCATCATGTCGCGTCAAGTTTTTTGGGGTCGTCGAGCGCTTCGGCTCACAGTCGACAACGACGGCGGGTCCGGACAGGACAGATTGTCAACGAATGTTGCGACAAGGAGTGTTCAAACAACATCATGGAAAGTTATTGTAACAGAAGAACTCCCGAAGTACCCCCCGAAAGCGCCATCTCGGAGAACCCTTCAGAAGAGATAACGGAAGACTCCACGTTG…	MDPFRVLLYMVTFLLYVVGPISSFRLCGRELADALAVVCKGRGYYIDDSEISQKDSPIVPHHVASSFLGSSSASAHSRQRRRVRTGQIVNECCDKECSNNIMESYCNRRTPEVPPESAISENPSEEITEDSTLRTDGDSTEIRTDNTNPATNLEVPSPEANAPDATATSDVEQSRSDNTTAVEKPKKKDNGKGKNSSLESSTKKNRTSKGMSKEERRRIASDERRASRERKKELSRERRKRLKMQQRKDKKKKKRLESAERNRGTDHMGLSEDSTLLAREPLGIDVRKRFHHTPRSSREQASTATHALDDDSATSRQERRRTQSRPSSRERKAHRTTTATAREEELQRERRNVMQRLTGLFL*
Octinsulin	NEW	Artemis	ATGGTAGAATGGGGCAAGGTGTCGATACGGTCGTCTTCCAACAACAAGTTGCTCGGGGTTGCTGTGGCGGTGTTGCTGCTGTGTGTCTGTGTGGCAGCGGGACAGAGCTGGCATTGTGGCAGGGCAGCGCAGACCATCATGGGCATGTGCAACAGCTGCTACGCCTCACACGACAAAAGAAGTATTTCGAAATCCTCTTATACACCAGCAAAGCCTTTCCTACACAAACGAAATGCAGTGCACTTCCTCAAATCGACAAAACGGGAAATTGAAAGTCGGCCCTCTATAGGTGACACGGCGATTGAGGTTGCGGTGGAGCGGAGGTCAACGGGTAACCGCGGATTCATCCACGAGTGCTGCAACAAGTTCTGTGATCCGGGGGAAATGGTGTTGTACTGC…	MVEWGKVSIRSSSNNKLLGVAVAVLLLCVCVAAGQSWHCGRAAQTIMGMCNSCYASHDKRSISKSSYTPAKPFLHKRNAVHFLKSTKREIESRPSIGDTAIEVAVERRSTGNRGFIHECCNKFCDPGEMVLYCCEKRQIEWAQFHNLLKA
Dilp7 ortholog	NEW	Artemis	ATGAAAATGGAAGGTGGTTGTCGCAGTACGGGGTGGTATTCGAAATGGTGTTCGACCCTGGTGAAGATAGTCGTTCTGTATCTGTGCCTCCATAGCTGTACCGAGAAGTTTTGCAATTGCATGGTGATACCGGAGCTTACCATGGAGGACTACGAAGACAGAACGCCAGAAGAATGGAGAGAAAGTTGGACTATGGATACGTTACGGACGTGCGTTGGACCACAGCTCCAGAGAGTAGGCGAATTAGCATGTATAAACGACCCGCGAAAAACAATTGTTGTTAAAAGAAGCAATTCAGACCGGGATCTCTTCCTCCCAGCAAAGCTGGCCAAGGCCTTCTTACAGTACCGGCATCGGAAGGACTCGAGGAGGCGACGAGTGGGCAAAGACGAAGAGTGC…	MKMEGGCRSTGWYSKWCSTLVKIVVLYLCLHSCTEKFCNCMVIPELTMEDYEDRTPEEWRESWTMDTLRTCVGPQLQRVGELACINDPRKTIVVKRSNSDRDLFLPAKLAKAFLQYRHRKDSRRRRVGKDEECCAEAQGCRWEELGEYCTLHTRAYHQSGEQP
GSS	NEW	Artemis	ATGGTTCACACAAGCAACCTCGTTGCCGCAGCTGCAGCCGTCACAACCGTCTTCTTACTCCTCGGGGCCGGGCCGGCCGAGGCGCAACAGGGCCCCCGCAACAGGTACTGCGGCTTGGAGTTTGCGAGGGCGGTGTTCAGTCAGTGCTCCATGGCGAATAAACGCTCCGATCCGGGTGCCGTCGCTGAGTCAGCGTCGGCCGCCAGATATCTAGCACGTGACACCGGATATGAACAAGCAGAAGATATGCCCTTGGAATGGTACGACATCGCTCGACAAGGAGCAGAGCGACTGCGCCCAAGCCTAACCGATATCATCTTTTCCAGCCGGTTCCGGCGATCGATCCAAAATCGACGTCAACTCCCGATGGGTCAACTATGTTGTGTGTATGGATGCACG…	MVHTSNLVAAAAAVTTVFLLLGAGPAEAQQGPRNRYCGLEFARAVFSQCSMANKRSDPGAVAESASAARYLARDTGYEQAEDMPLEWYDIARQGAERLRPSLTDIIFSSRFRRSIQNRRQLPMGQLCCVYGCTLVELASVC
Insulin-RTK	NEW	Trinty	ATGATGGATGGACTAGCAAGGATGGGGAGAACATCTGTTCGGTCCTCTACGCTATTGTTCTTTATCATCTTTATTGTTTGCTCATTGTTTTGCATTTCTAACGTCGCTGGAGCAGATGCAGATGGTGTTTGCAAATCCATGGATATCAGGAATAGTGCTGAGAAATTTGCCAAGCTTGAGAACTGCACCGTGATTGAAGGCTACCTCCAGATAGTACTAATAGACCATGCAACGCCCAGCGACTATGCAGGACTGAGCTTCCCCAAGCTGCGGGAGATCACGGAATACTTTGTGATGTTCCGGGTGAAGAACCTTCAGACCCTGCGCCACATCTTCCCCAACCTTGCTGTGATCCGAGGAGACAGCCTCTTCTTCAACTACGCCCTGATCATCTTTGAG…	MMDGLARMGRTSVRSSTLLFFIIFIVCSLFCISNVAGADADGVCKSMDIRNSAEKFAKLENCTVIEGYLQIVLIDHATPSDYAGLSFPKLREITEYFVMFRVKNLQTLRHIFPNLAVIRGDSLFFNYALIIFEMFELQEIGLPSLQAVMRGSVRIEKNINLCYLSTVDWSLVQFQGMENNFIKGNKDQEECFNFCPEDDGKRLCRKLTSSGDVAELCWTNEHCQKVCPTSCPRSCNAAGRCCHEQCIGGCSGSTASDCTACRHFLHLGVCVGECPNGTFQFKNRHCITGELCPSGWRLFNEKCTEECPGGYMPDVNDSRHCLPCTGTCPKVCKGKTIQSVEDAADMRGCTYVHGTLTISVHGRGNVLNELERNLGMIEVISDALIVRRANSLVSLNFLR…
GonadulinR-like	NEW	Trinty	ATGGAAAGTACTCTTCGCCTGTTTACCTTCATTTCAATCTTAATTTTCATCATCGGATCCGGGAGTTGCCAGTGGGCCAATGACCTGATAGAGTGTGATCCTGGCTTCTTCCCGTGCGGTAACAGCACCGAGTGTGTGGCTCAGCAATTCCAGTGTGATGACATTGCACATTGCCAAAATGCTGCCGATGAAAGTGGATGCGCCATCGATGACGGATGGCTCGCTCATTTTGACTATGTGCATCCCGTATCTGTGGGAGAGACCAAAGCCCTCAATGAATGCGCTCTAGCACAATATCCTGATGGTTGCATTTGCAGTAAATTAACTCAACTCGATTGCTCCGAATTTAATTTGGAAGAGGTCCCACCCAATTTACCAGAGAATATCACCAGACTATAC…	MESTLRLFTFISILIFIIGSGSCQWANDLIECDPGFFPCGNSTECVAQQFQCDDIAHCQNAADESGCAIDDGWLAHFDYVHPVSVGETKALNECALAQYPDGCICSKLTQLDCSEFNLEEVPPNLPENITRLYLKSNNIVNIGSELLANFSSLVYLNLMGNRIHEIAKNSFRNLRNLKTLFLSENNISRIETEAFNGLSGLHWLFINDNKMRTLEPGIFLGLEGLYWLDMRNNEIRDLQEGEALKDLKSLVWLDFEGNDIRSLNARSFAGNTSLTVLILINNSIETIERDAFTSLGTLVELDLSHNRISHLPEGIFDGLHTLEVLRLKNNPLFSLPVDVFRGMTKLVDLDLAEIMIGNINVDMFQGLTRLEKVAFDKFEYCRYAPHVRTCTPRSDGISS…
Dilp7R-like	NEW	Trinity & Artemis	ATGAACTGGGCAGTGTTGGTGGTGGTTGTGTCGAGTTTCTTCGGTACTCCACAGGCTTCCAATGGTACGAAAGNNNNNNNNNNNNNNNNNNNNNNNNNNNNNNNNNNNNNNNNNNNNNNNNTTGATGATAAGAACAACCGTGTTTATACCTTCATGGACCAAGGCAAGCATGACGACTCATCTGAGGAAGAAGACTTCATACCTCCAGCGTGTGATGCGGGTACATACCCGGATGTATGCCGATGTGTCCTCCTATACGAGGACCCGATGATTAATTTCGACTACTATGAATCGATGCTACAAGACGCGTACCCCAGCGCTTTTGCCGATCCGCTCTTTGGGGAAGCAGGGGAAGCATCCGAACCAATGGGGCTGGAAATAGCTTGCATATCAAAACAA…	MNWAVLVVVVSSFFGTPQASNGTKXXXXXXXXXXXXXXXXXDDKNNRVYTFMDQGKHDDSSEEEDFIPPACDAGTYPDVCRCVLLYEDPMINFDYYESMLQDAYPSAFADPLFGEAGEASEPMGLEIACISKQLDRVPEGLPADTIFLDLSDNRITHLHGDSFKNLTMLRELVITHNQMQTMDEDAFLDTPSLEMLDLSDNLIETITAAHFNNLRRLTLLRLSRNHFRCEGGDCFRNLANLREXXXXXXXXXXXXXXXXXXQLSYNAIKEIIPSHMNGLESLQDLYLSSNLISNIEHGSFDGMDNLLKLLLHDNKLTNISVGIFPVMPELAILKLDENEIDTIEPGSFALIENVQHFTLMKNRLSRIELGMFDGLGNVTDMSLLENEIKVIEENAFDNL…
GPA2/GPB5R-like	NEW	Trinty	ATGTGCAATTTGGATCCCCACCGGGCCCTCGTACGGGTTCTACGCATCGGTCTCGCCCTGTGGTGCGGGATGGTGCTCCGCTGTGAAGCCGTGAATGTCACCAGTACCTTGCAGCCGTATCGGCCCAACCCCCTGGTTCCCAGCCCCACCGTTCAAGGAGGAGGGCTTGAAGGAGAGGGCGTAGAAACTGAAGGAGGAGGAGGGGGCGCTCAGAAAGGATCATGTCCGTCGTTTTGCTCCTGCCAACCCCTTATCACCACCTGCCGCGGGACAGAGATTAAATCGATGGCACAACTGAATTTAAATTCAAACACCCAGCATCTGTACATCGATTATACAGATATTGAAGTCATCTTGAAGACGGATTTCCTGTATTTCCCTGTGCTGAAAACGATATCC…	MCNLDPHRALVRVLRIGLALWCGMVLRCEAVNVTSTLQPYRPNPLVPSPTVQGGGLEGEGVETEGGGGGAQKGSCPSFCSCQPLITTCRGTEIKSMAQLNLNSNTQHLYIDYTDIEVILKTDFLYFPVLKTISIRNSDKLTVIEEGAFSKSQLILIELENLPLQMPLPNIFGELPRLTQLQITRCNLDAVPNLISWTVDESQVLLKVDLSWNNLRTLEPGAFKGLRIHKLNLERNNIETVPDYAFRGSTIESLSLAYNPISVLEEKAFAEFEGPENLSLENTDISYLPTTGLKYLIELNIEGTDKLAVFPPIFRFERIRVAKLNYFSHCCAFNYQTKENYGNVNKQNVTMKIRTTSCPSTTMPTITSRGIEVIGFGDGAFVLSGTDTTIQRGSDIDDYG…
Bursicon-like	NEW	Trinty & Artemis	ATGGGAGACGCGAATACGAAATGTTATCTTTTGTTGCTGATATTCGCCCTGAGAATGACGAACTCTGGAGCGGGATCAACCACGAGGAAATGCGACCAAAGAATTTGCCCCGACGTCTGCTGTTGCTGGAAGGAAATCAAGGCCGATCAATCGACCAAACAATTTTATGGAAACTGCACCTATCGGAACTTATCGTCTGTTCCTGTGACAGTCAACGAAAACATGACCAGGCTGGATCTTGGTTTCAACTCCTTTGGGACGCTATACGGAGGGGCATTTGAGCACCTGCCAAGATTGGTGGAGTTAAGCCTTATTGGGAACAACATCACACACATTGATAATGATGCGTTCAGAGGACTTCACAGTTTGCAGCTCTTGATTCTTCAGGTAAACGGTCTG…	MGDANTKCYLLLLIFALRMTNSGAGSTTRKCDQRICPDVCCCWKEIKADQSTKQFYGNCTYRNLSSVPVTVNENMTRLDLGFNSFGTLYGGAFEHLPRLVELSLIGNNITHIDNDAFRGLHSLQLLILQVNGLVEFPSEPLRMVSHSLKSILLDDNAISNLTDNALLTLPDIHRLSLDSNRISQVPEGALRTAPKLQYLSLANNNINVLRSYAFSNNTRLDTLNLAKNKINYIPDHAFYGLRRLSELHLNNNPIRGVGTKAFTNLSALTVLAISDAKNLKDFPDLNGTFNLQEITLNRCNIKLLPKDLCSHMTSLRKIDFHSNQISVIPDLSGCTRLEIIDLKVNLITSLRGQPFYSLFHLIDLTLKSNLIQEIPDDAFLGLENLNYLDLSDNSITFIH…
GRL101-like	NEW	Trinty	GCCTGGTGGACTGTCCGAATAATGAAGCAGATGAAACCAACTGTGTTTGTACCGCGGATGAATACAGGTGCCCTAACGGCAAGTGCTTGCGACCCTCGGTGAGGTGCAACGGTGTCTGTGATTGTTTGTCTTGCGAGGACGAAAAAGAGTGCGCGGATGAAGAAATTTGTAATTATGAGACGAATGGTATCCTCTGTCAGATAGCAAACAACAAACCATCGAGGTGCGTCAGGAAAGAATACATCTGCGATGGATTTGGTGACTGTCCCAACAAAGCTGATGAGTTCAACTGTCAATTGCCAGGCAACACAACGGGCCACTGTGACCCGGAAGGGAACCCTCCTTACATGATGTGTGATATCAAAGACGGCGCCGACGATCCTCGATGTTTGCCTGCAC…	LVDCPNNEADETNCVCTADEYRCPNGKCLRPSVRCNGVCDCLSCEDEKECADEEICNYETNGILCQIANNKPSRCVRKEYICDGFGDCPNKADEFNCQLPGNTTGHCDPEGNPPYMMCDIKDGADDPRCLPALKVQCDKYRRPHCMYGFDEQTCNVTRPCDPEIEYECPYGRCIDLSNRCDAQLDCFDFSDEANCESFECPPGTWKCHSGQCIPEKQKCDYTPDCFYVNGTVDSSDEDKCDYKIFGCKEDEFRCHSGQCIPQDEVCFLDTTMKKGCNDRSHLNDCANRTCHENEFKCRNAHCVNMSDVCNGAVDCLPYWTDEDFCPHECGPALMCTCNHTQMSCINAGLESFHNFYVEEQISEINLSGNRIQISNEVLSGLPGLLRLDLSNNSLHDIGN…

## Sheet: Holothuria
Holothuria glaberrima
Name	Genbank identifier	Method	CDS	Protein
IGF-1	GIVL01429303.1 & GIVL01429304.1	NCBI	ATGCATCTCAACCAAATGTGCAAAATCCTTGTGTACCTATCTCTTTCACTGGTTTCTATGGTCTTATCAGCTGATGGCACAGGTCAAAAGTACTGCGGAGAGGCTCTCCTTGAGGCACTGGCTTTTATTTGTGGAGATCGAGGGTACTACGGAATGACGTCAGGGATTCATGGAAGATCAGTATCCAGATCGCCATTTCTGTCAGAAGAGCGGGCTAACTCTTTTCTTACAAACGACGGCACTCGAAACAGAAGAGGCACGGGTCGAATCGTCACCGAATGTTGCGAAAATTACTGCACAACTAGTGTTCTCGAATCTTATTGCAATTTTGCCACCGAGCTGCCAACGGAGTTGTCTACGGAGCGTACAACAACCGAACCGTCGGCGTCGCCCAGGAGA…	MHLNQMCKILVYLSLSLVSMVLSADGTGQKYCGEALLEALAFICGDRGYYGMTSGIHGRSVSRSPFLSEERANSFLTNDGTRNRRGTGRIVTECCENYCTTSVLESYCNFATELPTELSTERTTTEPSASPRRNSRHAGADITPDGETPRQSNNGRNRGNPNRHSEDNPEDNIDETVTHRTETEDQSRSNENRGNRGKGNRDNQNNCRNSKKKGSKKKGNRKCRPGNEDSASEDGGNRRPPSAATATEGADRSSGSRGGRGSNHQTGRGSDRGSSRSNGGKGKGNRNQDRNQTDEDAERNTSSENGHGSRQRGGGGEGEERRNNGGSSQRGGTSNSNTGTGNSQRTPGKPKKPQKGSSRRNQNQGSEEADENTGAVSDEQSESRNRVTPTQTNSNESSS…
IGF-2	GIVL01258177.1, GIVL01258178.1 & GIVL01258179.1	NCBI	ATGGACTTCAAGGCGCTGCTTTGTTATATAAATATCTATACATTATACCTCTTACATCCTATCATGGCGTCCCAGCGGTACTGTGGCTCCAATCTCGCAGACGCCCTCAAAATCATTTGTGCTGACAGAGGCTACTATGATCAACATCATACAGTGCATGGTGCTTTCCAAGCGATAATACCAAGAGAAACAGCTTCGTCATTTTTATCAACAAATACAGAGAATCACCCAAGGAGAATACGTCGAAGAACTGGTCAAATTGTAACAGAATGTTGTATAAATCATTGCACCCGCGGAATATTAGAAACTTATTGTAACCCTCGGGTGACCCTTGAACCTACGAGACCTGCCGTGACGTCATTGTCACCATTGAACCCTAGGTCGCAAGAGCCTTCCGGG…	MDFKALLCYINIYTLYLLHPIMASQRYCGSNLADALKIICADRGYYDQHHTVHGAFQAIIPRETASSFLSTNTENHPRRIRRRTGQIVTECCINHCTRGILETYCNPRVTLEPTRPAVTSLSPLNPRSQEPSGVQPQESPEEVHQENSRDNYPMGDNVVREDYEPPTNGGALTSGQPTPTENRISSGLREHSNTSIEQIPARTGNNSRVITEGVNLTDGSEQSSLEDENSESETPTRSSDGERVRTGPSRPSRTRRPRPPKPPKRKKLTSKERRERKKDKKKTKNKNDRGQRTNIKKQKSGERGSANPNPTRGGDREPTDNEQSRNRGKVNESQRPAERQQNNEEIDKLKKKITFIREALREVIIEPDSQIG-
Octinsulin	WURT01007398.1 & WURT01055923.1	Artemis	ATGGCTAAAGTTACTCCAATCATTCCTCTAGTTGGAAGTACACGGTGGTTCTCGGTTGGCGGGGTTGCATTGTGTTTCGTACTATTTGCATCATTGTGTTACGTCACATCGGGACAGTCTTGGCATTGCGGGAGTGCTACGGAGACGGTCAGGTCGGTGTGTAATGGATGCTATGCTGGGGGTAGCCATCTCTCAAGGAATTATCTGAAAAGATCACATCAAGAAAAAATACCACTCTTTAAAGAACCTTTCTTAGAAAAATCGTATGCCTTGAATTTCTTGCAAGCCAAATCACACGCTTCCGACGATCCTTCTCCTCTTATGGTGCGACAACGGCGAAGCGGACGCAGAGGTTTCATTGACGAATGTTGTCGGCGAAGTTGCGACATTTTCGAGATG…	MAKVTPIIPLVGSTRWFSVGGVALCFVLFASLCYVTSGQSWHCGSATETVRSVCNGCYAGGSHLSRNYLKRSHQEKIPLFKEPFLEKSYALNFLQAKSHASDDPSPLMVRQRRSGRRGFIDECCRRSCDIFEMIFYCCAAQQQFYAEFFKLVKRS
Dilp7 ortholog	WURT01007556.1 & WURT01021155.1	Artemis	ATGGGTTTGACGGTTGGCCAAATGTATCTGAATATATTACTACCGATACTTTTCGTAAATGTGATGTATTGGGGCGCAGGAGATACAACAGGCTTACCCGAAACAACAATCGAAACATTAAATGCATGGACAGCAAGTGAATGGGTAATCGCATGGGCGTCCGGGAGTCTTGTCCCTGTGGAAGGGTGTACTACCCTAAGTGTCCAACAACTTTTTGAATATGCATGTCAAAATGACTTTTATTACGATGCAGAAGCGTCTACTGGGCTGGGCAGTGGGACAGGTCGTAGAAGAAGACAAAGTTCCATTTTCCTAACTCACAGAGAAGCCAGTAATTTTCTACTGCACAGATCAAAAAGGTTCCGACGAGGAAGAACTCGGCGATCAACCACAATTTCA…	MGLTVGQMYLNILLPILFVNVMYWGAGDTTGLPETTIETLNAWTASEWVIAWASGSLVPVEGCTTLSVQQLFEYACQNDFYYDAEASTGLGSGTGRRRRQSSIFLTHREASNFLLHRSKRFRRGRTRRSTTISAECCGTQECKWEEIGEYCVHPREWHLP
GSS-1	WURT01047206.1	Artemis	ATGGCGTCCAAAGCAACCAGAGTAGTCTTCTTTGCAGCCGTTTGTGTCTTGTTGGTGTTGGAGGAAGCAGCGTCGGTGAGACTGTGCGGAGCTGACCTTTCCAGGGCGGTTTATCGTGTTTGTTCACATGGCAAAAGAGGTTATCCTATGGCTGACCTAGAGGAAGAAGATTTTAGTCAGGAACTAGACACAGAAGTGGATGAATTTTTGGCTCAGGCTTTAACGGGATTTTTAGCATCACGATCGTTTGCAGCAGACATGGAATCCGATAGATACTATACTTTACCTCAGAGATTCAGACGAAATGCACGTGGAGGTATAGCGCGAAGATGTTGTGCGAGTGGATGCAGCTCTTCAGACATTGCCAAATTATGCTAA	MASKATRVVFFAAVCVLLVLEEAASVRLCGADLSRAVYRVCSHGKRGYPMADLEEEDFSQELDTEVDEFLAQALTGFLASRSFAADMESDRYYTLPQRFRRNARGGIARRCCASGCSSSDIAKLC
GSS-2	WURT01041387.1 & WURT01052769.1	Artemis	ATGACTACTTTCGCTAGTTCTACCCTAAGTTTCCTCATCATCTGGATGTCCTGCGGGGCTGCGTTTGGCCTGGCTCACAAACTATGTGGTCCTGCTCTTGTCGACGCTCTGGCAGTCGTCTGCAGGGGCCGCGGATACTACGGAGGCACCGTCTCGCGAACCAAGCGAGAAGCCTCTCAAGATAAGTTAGATGTACATGCTGGGGGCTCCATGACTCACGTAAGGTTCACTCGTGGTATTGTCGAGGACTGTTGCTTCAAGGGATGTACCTGGTCTTACCTGGAAAACTACTGTTTGCTCTCCTGA	MTTFASSTLSFLIIWMSCGAAFGLAHKLCGPALVDALAVVCRGRGYYGGTVSRTKREASQDKLDVHAGGSMTHVRFTRGIVEDCCFKGCTWSYLENYCLLS
RTK	GIVL01193457.1	NCBI	ATGGAAGTAAGGAACTCTCTACTGTCATTGGTAGTGACTTTTTCCAGTTTTTTCCTGCCATGTCTTGCAACGAATAACAATACAGTGCCTGGATTTCAGGTTGCTCCGGCTTCACCTTCTCCGAAATCTGATTTTGTAAGAGACATAGATGTATGTGTGGGAGATATTGACATTCGCAACCAACCTCATCATCTGAATATCCTAGCAAAGTGTCGAGTGATCGAAGGCTCACTGTCATTTGTGCTGATAGATCATGCACTTCCTGAAGACTATAAGAGATTTTCTTTTCCAAAACTACATGAGATTACAGGCTTTCTCCTTGTGTACAGGGTTTCTAATTTGACGACTTTGTCAAATTTGTTTCCTAATCTGGCTGTGATAGGGGGGAATAAACTGATG…	MEVRNSLLSLVVTFSSFFLPCLATNNNTVPGFQVAPASPSPKSDFVRDIDVCVGDIDIRNQPHHLNILAKCRVIEGSLSFVLIDHALPEDYKRFSFPKLHEITGFLLVYRVSNLTTLSNLFPNLAVIGGNKLMFNYALVVYEMHALDTIGLHSLSRISRGAVRIEKNPRLCYIDTISWASIMNAEEMENNIITDNKLQSECANYCPTSDRQLCRKMLPQGTLKELCWDNEHCQRVCPTSCPHSCLMGNEKQCCHEECEGGCYDLTSRDCVTCKHFKHEGSCVRTCPRGTVQILNRHCILPEECPSHYKLFQEVCSEECPTGFTNDSLSPRSCTPCSGACPKTCDGATIQSVTDMERLEGCTVIDGTLKITLQGGQNTVKKLETYLGLIEEIRGALVIIR…
GonadulinR-like	GIVL01349072.1	NCBI	ATGAGTATGTCCAGTACGATCTATAGACATTCTAACTTGAGCATTCAAAGGGCTAACACAATGAGACCAACAGCTAGTATCAAGTTGGAATATTTTTGCCTCTGTGCCTGCGTTATTGCAAGTGTATGTTTCGCCTTCGAGTGCCCTGAAAACCATTTCATATGCGGCAACCTGACCAAATGCGTTCATCAGAAGTTCCAGTGTGATGGCAAGGACCATTGCGGTAACAGCGCAGACGAACAAGGTTGCAACAATTTGAAAGGATGGGTAAAGCAGATTGACAGCCGTCTTCAACCTAACGAGAAGGAACACGATGATAATTGCACTTTACCATCTCCACCGAAGGAATGTACCTGCTTCAGATACGACAGGCTAAAATGCAGTGAAATGAACCTTACG…	MSMSSTIYRHSNLSIQRANTMRPTASIKLEYFCLCACVIASVCFAFECPENHFICGNLTKCVHQKFQCDGKDHCGNSADEQGCNNLKGWVKQIDSRLQPNEKEHDDNCTLPSPPKECTCFRYDRLKCSEMNLTRVPKLPLNTSYLILMQNQIRDIPVDAFAGLYRLRVLYLAENIITTLLPGVFRDLNALEWLFLEDNNIRNLHEDSFLGLDSVYWLSLRQNGLQDLDLNDGLPFHGLSELKWWDLSNNKLTRISKDFLQGNYSLSTLDLHKNHISVIEPGAFLGQHNLTVLNLTWNNLSLVPKSINTELPQLETLCLSYNPLNLDKNSFANLPKLTQLDLYGVAIPNINYEMFREQKNVLIINFHRFEYCKFAPRVRNCFPKTDGISSTENLLEGTIL…
Dilp7R-like	WURT01004607.1	Artemis	TATTTTGATCATTTCATCCTGTGTGGATTTGCACCCCATGTAAAAGATTGTAACCCGAAAGGTGACGGTGTTTCAAACTCGGAGAACCTCCTAGGAAGCATCGTACTTCGCGTATCTGTATGGATGGTCTCCATTCTCGCCACATTTGGCAACCTTGTAGTACTCTTCGCGCGATGCTTGAGTAAGGATGACAATAAAGTCCATTCTTTCTTCATTATTAACCTTGCCGTCTCCGATTTTCTGATGGGAGCTTACCTCTTCATTGTCGCAATTCATGACGTCATATACAGGGGTTCATACATCGCATACGATCTTGACTGGCGTTCCGGCTGGGTCTGCAAAATGTGTGGAGCGTTCAGTCTGCTGTCCAGTGAGATGTCCGTCTTCACGTTGACCGTT…	YFDHFILCGFAPHVKDCNPKGDGVSNSENLLGSIVLRVSVWMVSILATFGNLVVLFARCLSKDDNKVHSFFIINLAVSDFLMGAYLFIVAIHDVIYRGSYIAYDLDWRSGWVCKMCGAFSLLSSEMSVFTLTVITADRYFCIVHPFRFRNRQILPAAVLMGFLWLLGITLALLPLVYKSYFGDYFYGANGVCLPLQFDRPFDDGWIFSLFVFVIANLLSFLFIVWAYIRMFTTIHRSNLAARSTKVSQDYALLKRFTIIVATDFLCWMPIIIVKFVTYGGVSIPPTAHAWFAIFILPVNSALNPILYTMTTRQFKRMLFHPSRALMGMSKSAGGNDLSQSVSRSRDREMGNTATSRLSVISHSHQMKNGGGVGTPGGTPAAERNSHMENMLSNVSRNFS…
BursiconR-like	GIVL01311107.1	NCBI	ATGGCCATGAAGATCTTAATTTTGTCTTTAATGATTTTCCAGTGTCTTTGTCAGATTGTTAACGAATACAAATGGGCTGACTGCAAATATGACAATAAAATATGTATTGACTGCAAATGTAGCTGCAAAAAGCAGAACGTTTATTCGGACCAACAACTGTTCATCTCGTGTGAAAATAGGTCAATATCATCATTGGAAGGAAACTTTCTCCCAACGATCAGAGAGTTGAAACAAAACTTAACTTTTCTAGATTTATCCCTTAATCAGTTGGAGGAGATCCCACCAGGTATATTCCAAGGACTGGAAAATGTAAAAGAATTGGGTTTGCGGCACAACCTGCTAACATCCCTACACAGCAATAGCTTTGCTGGGTTGACTAGTTTAATAGCCATAATATTG…	MAMKILILSLMIFQCLCQIVNEYKWADCKYDNKICIDCKCSCKKQNVYSDQQLFISCENRSISSLEGNFLPTIRELKQNLTFLDLSLNQLEEIPPGIFQGLENVKELGLRHNLLTSLHSNSFAGLTSLIAIILDKNKFEEFPTNAFLHQDLSSLREIFMDGSLIQTLSGEHFQKLHQLEVLWLENNRILEIPQRALSHLTQLRVLKLSGNLIANIPPLSFVNNTHLSVLFLSNNKIHYIPNDAFVGLRSLVELNLDGNPITNIGMKAFSNLPALKSIKISHAQNLQALPTLSGTFNLEELTLENCNISSVPTEFCMDMENLEKLDLPENKIEVLPSLIGCVRLVTLNLRSNRIHTLGNYSFEGPDNLLDLVLKGNLIESIPEMAFYGLHGLQHLDMSHN…
GPA2/GPB5R-like	WURT01006633.1, WURT01007556.1, WURT01075556.1 & WURT01030262.1	Artemis	ATGTTTTCTCAACTATTTGTGTTATTGTTCTTCATGGTGCATACTCCAACTGCCGATTGGGTTTTCCCAACTGTACTCCCTGAAATCAAGAAAACCACCCCGGTCACCCTGACGACGGTTGGGGACGCTACCGTCGGGGTAACCCAAGGCCGAATATCGGGTTGTGAGAAGAACGGCTGTGAGTGTAGACCTACAGACAGGATGGTGGAATGCCGCCACTCCCCATTTTATTCGTTGAGTGACATCAGCCTACCGTCGAACACCGAAATATTGGATCTTCAGTACTCTGCAGTGAAAGTGATTAGAAAAAACGATCTCCAAGCTTTTCCAAATTTGAGATCTTTTAGAATCAACGAGGCTCATAGCTTGAAGAGGATAGAGCCGGGGGCGTTCCACAAC…	MFSQLFVLLFFMVHTPTADWVFPTVLPEIKKTTPVTLTTVGDATVGVTQGRISGCEKNGCECRPTDRMVECRHSPFYSLSDISLPSNTEILDLQYSAVKVIRKNDLQAFPNLRSFRINEAHSLKRIEPGAFHNMKHLELVSITNTSKLLEIDHGVFGYLPGLKKLELSSGKLQKCPNLTSLISESITPPYINLDHNEIGEVVPFQFRGMKILRLSLDHNLIRNIPDYTFAKSKIVNLSLSANPISTLGEYAFTEIKDIKELILSHTNIDYLPTEGLTFILTLDISKTPRLTKFPSIFRFESIQVARLHYFSHCCAFSYMTSENYKMAQGLNITSETSLVTCPSTSDIPTTPETSTVSEDLEDEEAKMQEYRAILEHDAFGKFRENYDDVFNAHHGPYGD…
GRL101-like	WURT01048345.1 & WURT01075556.1	Artemis	GAGTTTCGCTTCTGTTGTGCGGTGAAACACATGTCACAAGACATAGAGTGCTTGCCAGAAGGAGACGAATTCTCATCTTGTGAAGACCTTATGAGAAATAAATTTCTTCGACTGAACCTATGGATTGTTGGTCTTGTTGCAACGCTTTGTAACGCTGTTGTCATAGTAACAAGATCTGGTAAAAGAAGAGATAGTAGGGTCCAGTCATTTTTGATCACTAACCTCGCTATTGGTGACATGTGTATGGGAATATATCTTCTCATCATAGCCGTTGCTGACTTCCATTTTCGCGGTCGCTATGGAGTCTATGACTTCTGGTGGAAGCATTCTATCTTATGTAAACTTGCCGGTTTTTTGTCCACCTTTTCCAGTGAACTATCCGTCCTGAGTTTAACATTT…	EFRFCCAVKHMSQDIECLPEGDEFSSCEDLMRNKFLRLNLWIVGLVATLCNAVVIVTRSGKRRDSRVQSFLITNLAIGDMCMGIYLLIIAVADFHFRGRYGVYDFWWKHSILCKLAGFLSTFSSELSVLSLTFITLHRVSSIVFPFRTKDMGFSRIVWIMTSAWCLVFALAVIPILGIPYFGNFYGRSGVCLALHITPDKPSGWEYSVFVFLVLNFFSFMFIAGAYIVMFHVARRTQQAAKRSLRSNKGSDAMARKMTLIVFTDFCCWMPIIVLGVASLCGARIHPQVFAWIAVFVLPLNSAVNPLLYTLWTAPYARQIITRARETILRSNVTTEYKLSANLSTSEKFSSAMNGRRRGNRAVPGTSSVRLPPEKSTGSMRSSDVIHDPEETIRMNEMSH…

## Sheet: Lytechinus
Lytechinus variegatus
Name	Genbank identifier	Method	CDS	Protein
IGF-1	GAUR01040890.1	Artemis	ATGATTTGCAGTGGCTTCCCGTTGGCTCTTCTGTCTCTCCTCCTATTGGTTATTTTGTGTCACGTGACTGCGTCATTTCCGCTCCTTTGTGGTCAAGAACTTGTGAATGCTGTTGCATTTGTGTGTGACGGCCGTGGCTACTACGGTCAGCCCAGCAAAAGATCGGCTGGCGTCTTCGAGTTGGAATCACGGGCAAAGACATTTCTGAAGTCGGGGATATCCAGAGGTGAGCTTGGTCGGTCAAAACGCCGCGTAAGAACAGGTCTCATCGTAACAGAGTGCTGCCACAACCGATGTTCAGTCTCCCATCTGGAAAGTTACTGCAATCCATTGCCCCAGGACGCAGTCCATGACCCAGAAGTGCACATACGACTGGAGAAGTCCGCTGAAGAAGATGCC…	MICSGFPLALLSLLLLVILCHVTASFPLLCGQELVNAVAFVCDGRGYYGQPSKRSAGVFELESRAKTFLKSGISRGELGRSKRRVRTGLIVTECCHNRCSVSHLESYCNPLPQDAVHDPEVHIRLEKSAEEDADEGRPQDGPSQLDTATGTMLGTDASESRGRVRIDAVEKVISGRLVPTSTMGSSTPPSRKKPRKDKSERRKSSREEKQARREERRRNRERSSGGKSRSGRRKNKDNDRSSRAKRQGLTLWRNMFSQKALSNTQALENQHILDSLNGIAPSSTIIDTFETETLLQHEKSLQDGAISHTKQPSINADEDRNAIFSDLMTKLRTLVLDFTSDR
IGF-2	NEW	Artemis	ATGGACCCGTTCAGGGTACTTCTATATATCCTCACCTTCCTAATATATGTGATAGGACCCATCTCATCGTATCGCCTCTGTGGGCGAGAACTGGCTGATGCTCTGGCGGTCGTATGCAAAGGGCGTGGTTACTATATCGACGATTCAGAAATTGCACAAAAAGATTCGCCGATTGTACCGCGTCATGTCGCTTCAAGTTTTTTGGGTTCATCCAGCGCATCGGCCCACAGTCGACAGCGGCGACGGGTTCGGTCAGGGCAGATCGTCAACGAATGCTGCGATAACGAGTGCTCAAACAACATCATGGAAAGTTATTGTAACAAAAGAACACCTGAGGTGCCTTCCGAGAGCGCCATTTCTGAAATTCCTTCAGGAGACAGAACTGAAGACTCCACAGTG…	MDPFRVLLYILTFLIYVIGPISSYRLCGRELADALAVVCKGRGYYIDDSEIAQKDSPIVPRHVASSFLGSSSASAHSRQRRRVRSGQIVNECCDNECSNNIMESYCNKRTPEVPSESAISEIPSGDRTEDSTVRTNDQSTERRTDDTDDATNLEVPSPDADAPDATATSDVERPLPEETTAVEKPKKKDNGRGKNSSSESSTKKNRTSKGMSKEERRRIASEERKASRERKKELSRERRRRLKLQQRKDKKKKKRLESAERNRGTDHMGLSEDSTLLAREPLGIDVRKRFHHTPRSSREQASTATHTSDDDPATSRQERRRTQARLSSRERKLHRTTTATAREESQRDRRNVLQRLTGIFL
Octinsulin	GAUR01033290.1, partial	Artemis	ATGGTAGAATGGGGCAAGGTCTCGTTTCGGTCGTCTTCCACCAACAAGTTGCTCGGGGTTGCTGTCGCGGTGTTGCTGCTGTGTGTCTGTGTTGCTGCAGGACAGAGTTGGCACTGTGGCAGGGCCGCTCAAACCATCATGAGCATGTGTGATAGCTGTTACGCCTCATACGACAAAAGAAGTACTTCGAAATCATCTTATACACCAGCAAAGCCTTTCCTACACAAAAGAAATGCAGTGCACTTCCTAAAATCGGCAACGCGGGAAATAGAAAACCGGCCCTCTATAGGTGACACAGCGGTAATGTCAGTGGAGAGGAGGTCAACAGGTCACCGCGGTTTCATTCACGAGTGCTGTAACAAATTCTGCGATCCGGGCGAAATGATATTGTACTGCTGC…	MVEWGKVSFRSSSTNKLLGVAVAVLLLCVCVAAGQSWHCGRAAQTIMSMCDSCYASYDKRSTSKSSYTPAKPFLHKRNAVHFLKSATREIENRPSIGDTAVMSVERRSTGHRGFIHECCNKFCDPGEMILYCCEKRQIEWAHFHNLLKA
Dilp7 ortholog	NEW	Artemis	GTGAAAATGGATTTCGGCGGTCGAGGTACGGGCTGGTATTCGAGGTGGTGGTCGACGTTGACGACGATAGCCGTGTTATACCTGTGCCTGCAAAGCTGTTCTGATAATCTTTGCAATTGCCAGGTCATACCACAAGAAACAATGGATGAATACGAACTAAGAACACCAGAAGAATGGAGAGAAAATTGGCTCTTAGATTCATTATATACCTGTGTGGGACCACAGCTACAGAGGCTTGGCGAATTAGCGTGTATGAACGACCCAAGAAAATCAGTTGTTGTTAAAAGAAGCAATTCAGGTAGGGAAATCTTCCTCCCGGCAAAGCTTGCCAAAGCCTTCTTACATTACCGCCATCGGCACGACTCGAGAAGACGGCGAACGGGTAAGGACGAGGAATGT…	VKMDFGGRGTGWYSRWWSTLTTIAVLYLCLQSCSDNLCNCQVIPQETMDEYELRTPEEWRENWLLDSLYTCVGPQLQRLGELACMNDPRKSVVVKRSNSGREIFLPAKLAKAFLHYRHRHDSRRRRTGKDEECCLESNGCHLEELGEYCTLHSRAYHVSGSQP
GSS	NEW	Artemis	ATGTCTCACACGACCAATCTCGTCGCAGCAGCTGCAGCAGTCACAACCGTCCTCATTCTCATCGGAGCAGCCCCGGCCGAGGGGCAGCACCTCACCCGCGTCAGGCTGTGTGGTCTTGAGTTCGCCAGGGCTGTCTACAACCACTGCTCACGGGCCAGCAAACGTTCCGATCCAGGCACCATCAGTGATATACCATTGGCTGACAGATATTTAGCACGTGACACCGGATATGGTCAAGTACAAGACACACCCTTTGAATGGTATGACGTCGCAGGACAAGCAGAGGAACGGCTGCGTCCAAGTCTGTCCGATATCATTTTTGCTCCACGGTATAGGCGATCGCTTTTCGCTCGTCCAAATACCCCGATGGGTCGCCATTGCTGTGTGACCGGCTGTACG…	MSHTTNLVAAAAAVTTVLILIGAAPAEGQHLTRVRLCGLEFARAVYNHCSRASKRSDPGTISDIPLADRYLARDTGYGQVQDTPFEWYDVAGQAEERLRPSLSDIIFAPRYRRSLFARPNTPMGRHCCVTGCTSQELASVC
Insulin-RTK	NEW	Artemis	ATGGATGGACCATCATTTGGAATAGGTAGAACATCTGTTCTATCCACATTGCTGTTCTCACTGTTTATTGTATCTTCACTGTTCTGCATTTCTCGTGTCTCTGGAGCAGATGCTGATGTATGCAAATCTATGGACATCAGAAATAGCGCTGAGTACTTTTCCAAGCTTGAGAACTGTACCGTGATCGAAGGCTACCTCCAGATAGTGCTCATAGACCATGCAAAACCCAGTGACTATGCCGGACTCAGCTTCCCGAAGCTACGTGAGATCACAGAATACTTTGTGATGTTCCGGGTGAAGAACCTTCAGACCCTACGCCACATCTTCCCCAACCTTGCCGTGATCCGAGGGGACAGCCTGTTCTTCAACTATGCCCTGATCGTCTTTGAGATGTTTGAG…	MDGPSFGIGRTSVLSTLLFSLFIVSSLFCISRVSGADADVCKSMDIRNSAEYFSKLENCTVIEGYLQIVLIDHAKPSDYAGLSFPKLREITEYFVMFRVKNLQTLRHIFPNLAVIRGDSLFFNYALIVFEMFELQEIGLPSLQAVMRGWVRIEKNINLCYLSTVDWSLVQVQGMENNFIKGNKDQEECFNFCPEDDGKRLCRKLTATGDVAELCWTGQDCQKVCPVSCPRSCNEAGRCCHEQCIGGCRGSTASDCTACRHFLHLGVCVGQCPNRTFQFKNRHCITAEQCPAGWKLFNEKCTQDCPGGYMPDFNDSRHCLPCTGTCPKVCDGKTIQSVEDAAAMKGCTYVHGSLTISVHGRGNVVKELEQNLGMIEVVSDALIVRRANSLVSLNFLRNLR…
GonadulinR-like	NEW	Artemis	TAATTCTAGTTATCATCATCGGATCTGGAAGTTGCCAGTGGGCCAACGATCTTATAGAGTGCGACCCGGGCTTCTTCCCGTGTGGAAACAGCACCGAATGTGTGGCTCAGCAATTCCAGTGCGACGACATTGCACATTGTCAAAATGCTGCCGACGAAATGGGATGTGCTATTGATGACGGTTGGGTTGCCCACTTTGATTACGTTCATCCTGTGCCGGTTGGAGAAAACAGAGCCCTCAACGAATGCGGCCCTGGCTTACTATCCCAAAGGTTGCAACTGCAGCAAATTAACACAACTCGATTGCTCCAAACTGAACTTAAAAGAAGTGCCATCCAACTTACCAGACAATGTGACAAGACTTACCTGAAATCAAACAACATCGTTAACATCGGGAGTG…	ILVIIIGSGSCQWANDLIECDPGFFPCGNSTECVAQQFQCDDIAHCQNAADEMGCAIDDGWVAHFDYVHPVPVGENRALNECGPGLLSQRLQLQQINTTRLLQTELKRSAIQLTRQCDKTYLKSNNIVNIGSELFDDFSSLIYLNLMRNRIYEIKANSFRNLRILTRLFLSENNISRIDTGAFNGLSGLHWLFLNDNKMQTLEPGIFIGLEDLYWLDLRNNEIRDLQEGECLNDLKSLVWLDLEGNDIMSLNARSFAGNTSLTVLILRNNSIKSMENNSFASLGTLVELDLSHNQISHLPDGIFDGLHSLEILRLRNNPLFSLPVDVFRGLENLVDLDLAEVLIGNINVNMFKGLGRLEKVAFSKFEYCRYAPHVRTCTPRSDGISSFENLLKNVILRV…
Dilp7R-like	NEW	Artemis	ATGAACTTGGCATTGCTGATGGTAGTTGTGACGAGTTTCTTCGATACTTCATTGGCTTCCCATAACACTAAAGATGACCATCTCGATGATGCGCCCGTCATCCGTCATCGTCGTCAAGCTCCGATGTCGACCGACCCTCACGCCCACTGTGGTGAATGGTTCCCATGTATAAACTCAACGCAATGCATTCCTCAAGAAGCTATATGCGATGGCAACATCGACTGCGACAACGAATCGGACGAGTCGGATGAAGAATGTATCGACGATAAGAATAGGCGTGTGTATACCTTTATGGATCAAGGAAAGACTGACGACTCATCGGAGGAAGATGACTTTATACCACCAGCATGTGATATTGGAACATACCCAGAAGAATGCAGATGTGTTCTCCTGTACGAA…	MNLALLMVVVTSFFDTSLASHNTKDDHLDDAPVIRHRRQAPMSTDPHAHCGEWFPCINSTQCIPQEAICDGNIDCDNESDESDEECIDDKNRRVYTFMDQGKTDDSSEEDDFIPPACDIGTYPEECRCVLLYEDPMAHFDYYESMLQDAYPSVFAEPPIGATSEPLGLEIACTSKRLERVPEGLPPGTLYMDLSDNRITHLHGDSFQNLTRLRELVITHNQMQSMDEDVFYDTRSLEMLDLSDNRIERITSAHFDSLRRLSLLRLSRNHFRCEDGDCFRNLVSLRELELVACGITELTPDMFRNLHSLSVLQLSYNAITEIMPSHMNGLEGLQDLYLSSNHISHIENGSFDGMDRLLKILLHDNKLKNISVGVFPFMPELVILKLDENEIDMIEPGSFS…
BursiconR-like	NEW	Artemis	ATGGCTCAGGAAAATACAAAAGTTTATATCTTGTTACTTCTTTTTGTTCTTGGATGGAGCAACTATGGAGCCGGATCGAACACGAGGAAATGTGACGGACAAATTTGCCCCGATATCTGCTGTTGTTGGAAGCAAAGTAAAAACGACAAAACGATGAACCAATTTTATGGAAACTGCACCCATCGGAACCTGACAACTGTGCCGGAAACAATCACAGAAAACATGACCAGATTAGATCTTGGTTACAACTCATTCGGAAACCTACACGGAGGAGCATTCGACCACTTGCCAAGATTGCTGGAATTAAGTCTCATCGGGAACAGTATCGCACACATTGACGATGACGCATTCAGAGGTCTCTATAATTTACAACTCTTGATCCTTCAAGTTAACAGTTTA…	MAQENTKVYILLLLFVLGWSNYGAGSNTRKCDGQICPDICCCWKQSKNDKTMNQFYGNCTHRNLTTVPETITENMTRLDLGYNSFGNLHGGAFDHLPRLLELSLIGNSIAHIDDDAFRGLYNLQLLILQVNSLTEFPTEPLRLVSHSLKSILLDDNAISNLTDEALITIPDIHHLSLDSNHLSQVPEGALRATSKLQYLSLANNNIRQLRPNAFISNPRLETLNLAKNKISYIPDHAFFGLRQLAELHLNNNPIRGVGTKAFTNLSALTVLAISDAKNLQEFPDLNGTFNLQEITLNRCNIKHLPEDLCSHMTSLRKIDFHSNQISVIPDLSGCSQLRMIDLKVNQITSLRGQPFFSLFHLLDLTLKSNLIQAIPQDAFIGLENLNYLDLSDNRITAIH…
GPA2/GPB5R-like	NEW	Artemis	TATATCGATGATACAGATATTGAAGTGATCCGGAAGACTGATTTCCTAAATTTGCCGATGCTGAAATTAATATCCATCAAAAACAGCGACAAACTGGAAGTCATCGAGGAAGGGGCGTTTACCAGAAGTCAACTAATTCTAATAGAATTAGACAATCTCCCGCTGAAGATGCCTTTACCGAACATTATCGGAGAACTACCACACCTCACCCAACTACAAATTACACGGTGCAACCTGAATGCTGTTCCGAATATGACATCCTTGACCATTGATGAGTCGCAAGTTCTCCTTAAGGTGGATTTGTCCTGGAACAACCTGAGAATTTTGGAACCTGGGGCTTTCAAGGGTCTCCGGATTCACAAACTGAATCTGGAAAGGAACAACATAGCAACTGTCCCA…	YIDDTDIEVIRKTDFLNLPMLKLISIKNSDKLEVIEEGAFTRSQLILIELDNLPLKMPLPNIIGELPHLTQLQITRCNLNAVPNMTSLTIDESQVLLKVDLSWNNLRILEPGAFKGLRIHKLNLERNNIATVPDYAFRGSTIENLSLAYNPISTLAENAFAEFDGPENLSLEKTDIDYLPTTGLKYLIELNIEGTDRLSVFPPIFRFERIRVAKLTYFSHCCAFNYQTKENYGFVNKQSVTAKIRTTSCPSTTMPTITSRGIDVIGFGDGAFVLPGTDTTIQRGADIDDYGQSLFGQYQGAGMQKESLPNSAFDPRELNGSIIEESIPVQKPPPIEDGSSWTPNGINPNITHDVNGSKCDGDLVTTDYSDVMCTPQPNAFHPCSDVMGYVFLRVMVWFV…
GRL101-like	NEW	Artemis	TTCTTGTCAGCAATGTTGTCGGGGTCAATATTCGCCAGTGCGACGTTGAGAGGGAATTCGAGTGTGAGCCAGGAGCCTGCATACCAAGAAACTTGACATGTAATGGTATATTCGATTGCGAACTCGGTCAGGACGAGGAAGTTGCATTTTGCGGATGTGCGGATAATGAGTTCCCGTGCAGCCATTCGTGTATCCCAATTGAGTTAAGATGTGACACCAAGTGTGATTGTGAAGATGACTGCGCAGATATGAATGGATGCGATACATTTCCATGTCAAGCAAATTACCATAAGTGTGCCAATAATCACTACTGCATACCTCCTCATCTAGTGTGCAATTTCATTGACGATTGCGGAGATAATTCAGATGAAGAAGCATGTGCTCATCGAGAATGTTATA…	VSNVVGVNIRQCDVEREFECEPGACIPRNLTCNGIFDCELGQDEEVAFCGCADNEFPCSHSCIPIELRCDTKCDCEDDCADMNGCDTFPCQANYHKCANNHYCIPPHLVCNFIDDCGDNSDEEACAHRECYKLEFKCSNRQCINAGFMCDGNPDCFDGSDEARCDEDHYVLCGNGKKIYEHEWCDRNVDCPDNEADEQNCDCTADEYKCPNGKCLRPSVRCNGVCDCMSCEDEKECTDEDMCNYETNGILCAIKNNKPAPCVRQEYICDGYSDCPRNMDEYNCQIPGKVSGFCDPEGINPHMMCDDKDGLDDPRCVPSKVLCDPYRRPSCMYGFDEQTCNVTRPCDPELEFECPYGRCIDLSSRCDAHLDCFDFSDEANCESYECPTGTWKCQSGQCLP…

[truncated: 9 more sheets: Oligometra, OphodermaB, Ophiothrix, PatiriaM, Pisaster, Ptychodera, Saccoglossus, Schizocardium, Strongylocentrotus]
